# Supplementary material for: Acid-promoted rapid solvent-free access to substituted 1,4-dihydropyridines from β-ketothioamides
Source: Royal Society of Chemistry journal article supplement (doi:10.1039/c5ra26931h), 2016-01-01

## Supporting Information

### Acid-promoted rapid solvent-free access to substituted 1,4-dihydropyridines from $\beta$ -ketothioamides

M. Li,\* Ke-Na Sun and Li-Rong Wen\*

*State Key Laboratory Base of Eco-Chemical Engineering, College of Chemistry and Molecular Engineering, Qingdao University of Science and Technology, Qingdao 266042, China*

#### Table of Contents

|                                                                      |     |
|----------------------------------------------------------------------|-----|
| The X-ray structure of compound <b>4b</b> .....                      | S2  |
| Characterization data of compounds <b>4</b> and <b>6</b> .....       | S2  |
| <sup>1</sup> H NMR and <sup>13</sup> C NMR Spectra of <b>4</b> ..... | S12 |
| <sup>1</sup> H NMR Spectrum of compound <b>6</b> .....               | S68 |

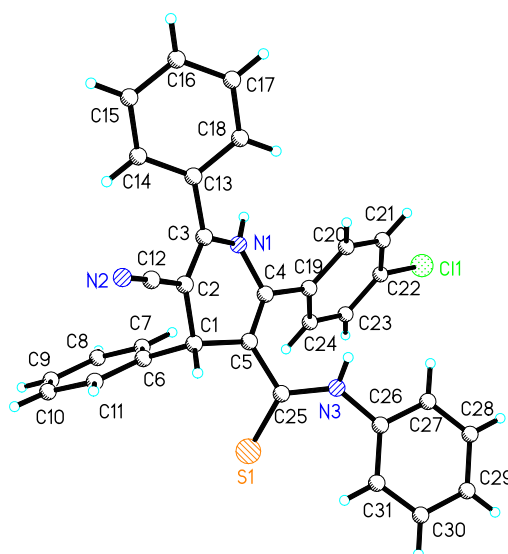

**Figure S1.** X-ray crystal structure of **4b**

#### Characterization data of compounds **4**

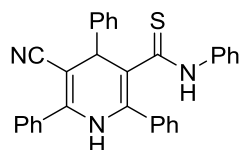

**5-Cyano-*N*,2,4,6-tetraphenyl-1,4-dihydropyridine-3-carbothioamide (4a).** Yellow powder (216.0 mg, 92%); mp: 206–208 °C; <sup>1</sup>H NMR (500 MHz, DMSO-*d*<sub>6</sub>): δ (ppm) 10.69 (1H, s, C(=S)-NH), 9.48 (1H, s, C=C-NH), 7.66 (2H, d, *J* = 6.95 Hz, ArH), 7.60 (2H, d, *J* = 6.55 Hz, ArH), 7.51–7.47 (5H, m, ArH), 7.41–7.34 (5H, m, ArH), 7.27 (1H, t, *J* = 7.23 Hz, ArH), 7.20 (2H, t, *J* = 7.50 Hz, ArH), 7.09 (1H, t, *J* = 7.28 Hz, ArH), 7.03 (2H, d, *J* = 7.45 Hz, ArH), 5.08 (1H, s, Ar-CH); <sup>13</sup>C NMR (125 MHz, DMSO-*d*<sub>6</sub>): δ (ppm) 196.9, 150.0, 145.1, 139.4, 135.4, 134.8, 133.4, 130.9, 129.5, 129.2, 128.9, 128.6, 128.5, 128.2, 127.3, 126.5, 124.2, 121.3, 114.5, 82.0, 46.2; HRMS (ESI-TOF): calcd for C<sub>31</sub>H<sub>24</sub>N<sub>3</sub>S [M + H]<sup>+</sup>, 470.1691, found 470.1695.

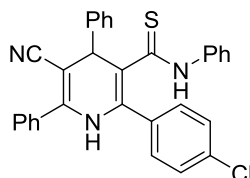

**2-(4-Chlorophenyl)-5-cyano-*N*,4,6-triphenyl-1,4-dihydropyridine-3-carbothioamide (4b).** Yellow powder (209.2 mg, 83%); mp: 207–209 °C; <sup>1</sup>H NMR (500 MHz, DMSO-*d*<sub>6</sub>): δ (ppm) 10.81 (1H, s, C(=S)-NH), 9.47 (1H, s, C=C-NH), 7.63 (2H, d, *J* = 7.55 Hz, ArH), 7.58 (2H, d, *J* = 6.35 Hz, ArH), 7.50 (3H, t, *J* = 7.05 Hz, ArH), 7.45 (4H, t, *J* = 8.53 Hz, ArH), 7.37 (2H, t, *J* = 7.28 Hz, ArH), 7.26 (1H, d, *J* = 7.05 Hz, ArH), 7.22 (2H, t, *J* = 7.68 Hz, ArH), 7.11 (1H, d, *J* = 7.10 Hz, ArH),

7.07 (2H, d,  $J = 7.20$  Hz, ArH), 5.56 (1H, s, Ar-CH);  $^{13}\text{C}$  NMR (125 MHz,  $\text{DMSO-}d_6$ ):  $\delta$  (ppm) 196.6, 149.9, 144.8, 139.3, 133.9, 133.5, 133.3, 131.3, 130.9, 129.1, 128.9, 128.8, 128.7, 128.4, 128.2, 127.4, 126.6, 124.0, 121.0, 115.0, 82.0, 46.2; HRMS (ESI-TOF): calcd for  $\text{C}_{31}\text{H}_{23}\text{N}_3\text{SCl}$  [ $\text{M} + \text{H}$ ] $^+$ , 504.1301, found 504.1325.

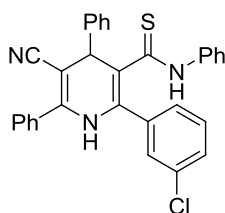

**2-(3-Chlorophenyl)-5-cyano-N,4,6-triphenyl-1,4-dihydropyridine-3-carbothioamide (4c).** Yellow powder (191.5 mg, 76%); mp: 189–191 °C;  $^1\text{H}$  NMR (500 MHz,  $\text{DMSO-}d_6$ ):  $\delta$  (ppm) 10.79 (1H, s,  $\text{C}(=\text{S})\text{-NH}$ ), 9.43 (1H, s,  $\text{C}=\text{C}\text{-NH}$ ), 7.66 (1H, s, ArH), 7.59 (3H, d,  $J = 6.85$  Hz, ArH), 7.52 (3H, t,  $J = 6.60$  Hz, ArH), 7.47 (2H, d,  $J = 7.50$  Hz, ArH), 7.42–7.38 (4H, m, ArH), 7.28 (1H, t,  $J = 7.15$  Hz, ArH), 7.23 (2H, t,  $J = 7.48$  Hz, ArH), 7.12 (1H, t,  $J = 7.25$  Hz, ArH), 7.01 (2H, d,  $J = 7.20$  Hz, ArH), 5.14 (1H, s, Ar-CH);  $^{13}\text{C}$  NMR (125 MHz,  $\text{DMSO-}d_6$ ):  $\delta$  (ppm) 196.8, 149.9, 144.6, 139.2, 136.5, 133.4, 132.8, 130.8, 130.1, 129.3, 129.1, 128.8, 128.7, 128.3, 127.8, 127.4, 126.6, 124.2, 121.0, 115.6, 82.1, 46.4; HRMS (ESI-TOF): calcd for  $\text{C}_{31}\text{H}_{23}\text{N}_3\text{SCl}$  [ $\text{M} + \text{H}$ ] $^+$ , 504.1301, found 504.1312.

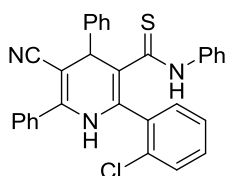

**2-(2-Chlorophenyl)-5-cyano-N,4,6-triphenyl-1,4-dihydropyridine-3-carbothioamide (4d).** Yellow powder (156.3 mg, 62%); mp: 128–130 °C;  $^1\text{H}$  NMR (500 MHz,  $\text{DMSO-}d_6$ ):  $\delta$  (ppm) 10.53 (1H, broad, s,  $\text{C}(=\text{S})\text{-NH}$ ), 9.40 (1H, s,  $\text{C}=\text{C}\text{-NH}$ ), 7.55 (3H, broad, s, ArH), 7.50–7.48 (6H, broad, m, ArH), 7.43 (2H, t,  $J = 7.30$  Hz, ArH), 7.39–7.30 (4H, m, ArH), 7.23 (2H, t,  $J = 3.83$  Hz, ArH), 7.12 (1H, t,  $J = 7.00$  Hz, ArH), 7.04 (1H, broad, s, ArH), 5.27 (1H, s, Ar-CH);  $^{13}\text{C}$  NMR (125 MHz,  $\text{DMSO-}d_6$ ):  $\delta$  (ppm) 196.8, 149.4, 144.6, 144.4, 139.2, 133.4, 132.7, 131.1, 130.8, 129.6, 129.1, 128.9, 128.7, 128.4, 128.2, 128.0, 127.5, 124.4, 123.9, 119.9, 81.2, 46.6; HRMS (ESI-TOF): calcd for  $\text{C}_{31}\text{H}_{23}\text{N}_3\text{SCl}$  [ $\text{M} + \text{H}$ ] $^+$ , 504.1296, found 504.1289.

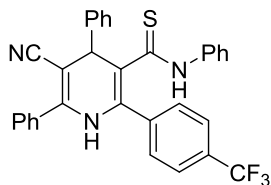

**5-Cyano-N,4,6-triphenyl-2-(4-(trifluoromethyl)phenyl)-1,4-dihydropyridine-3-carbothioamide (4e).** Yellow powder (182.8 mg, 68%); mp: 171–173 °C;  $^1\text{H}$  NMR (500 MHz,  $\text{DMSO-}d_6$ ):  $\delta$  (ppm) 10.81 (1H, s,  $\text{C}(=\text{S})\text{-NH}$ ), 9.49 (1H, s,  $\text{C}=\text{C}\text{-NH}$ ), 7.83 (2H, s, ArH), 7.79 (2H, s, ArH), 7.61 (2H, d,  $J = 6.50$  Hz, ArH), 7.54–7.48 (5H, m, ArH), 7.40 (2H, t,  $J = 7.23$  Hz, ArH), 7.29 (1H, t,  $J = 6.98$  Hz, ArH), 7.21 (2H, t,  $J = 6.85$  Hz, ArH), 7.12 (1H, t,  $J = 6.95$  Hz, ArH), 7.00 (2H, s, ArH), 5.16 (1H, s, Ar-CH);  $^{13}\text{C}$  NMR (125 MHz,  $\text{DMSO-}d_6$ ):  $\delta$  (ppm) 196.5, 149.9, 144.6, 139.0 (d,  $^2J_{\text{C-F}} = 42.0$  Hz), 133.3, 130.9, 130.3, 129.6, 129.1, 128.9, 128.6, 128.3, 127.4, 126.6, 125.2, 124.5 (d,

$^1J_{C-F} = 271.6$  Hz), 124.0, 121.0, 115.9, 82.1, 46.3; HRMS (ESI-TOF): calcd for  $C_{32}H_{23}N_3SF_3$  [ $M + H$ ] $^+$ , 538.1565, found 538.1562.

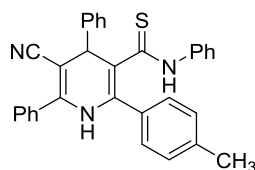

**5-Cyano-N,4,6-triphenyl-2-(p-tolyl)-1,4-dihydropyridine-3-carbothioamide (4f).** Yellow powder (227.3 mg, 94%); mp: 170–172 °C;  $^1H$  NMR (500 MHz,  $DMSO-d_6$ ):  $\delta$  (ppm) 10.69 (1H, s, C(=S)-NH), 9.42 (1H, s, C=C-NH), 7.57 (2H, d,  $J = 5.90$  Hz, ArH), 7.54 (2H, d,  $J = 7.45$  Hz, ArH), 7.49 (3H, t,  $J = 6.60$  Hz, ArH), 7.45 (2H, d,  $J = 7.60$  Hz, ArH), 7.36 (2H, t,  $J = 7.38$  Hz, ArH), 7.25 (1H, d,  $J = 7.30$  Hz, ArH), 7.19 (4H, t,  $J = 7.25$  Hz, ArH), 7.08 (3H, t,  $J = 6.85$  Hz, ArH), 5.02 (1H, s, Ar-CH), 2.26 (3H, s,  $CH_3$ );  $^{13}C$  NMR (125 MHz,  $DMSO-d_6$ ):  $\delta$  (ppm) 197.0, 149.9, 145.1, 139.5, 138.9, 135.5, 133.4, 131.9, 130.8, 129.3, 129.2, 128.8, 128.5, 128.1, 127.2, 126.4, 124.1, 121.3, 114.1, 82.0, 46.2, 21.3; HRMS (ESI-TOF): calcd for  $C_{32}H_{26}N_3S$  [ $M + H$ ] $^+$ , 484.1847, found 484.1852.

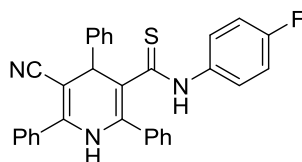

**5-Cyano-N-(4-fluorophenyl)-2,4,6-triphenyl-1,4-dihydropyridine-3-carbothioamide (4g).** Yellow powder (219.4 mg, 90%); mp: 187–189 °C;  $^1H$  NMR (500 MHz,  $DMSO-d_6$ ):  $\delta$  (ppm) 10.68 (1H, s, C(=S)-NH), 9.47 (1H, s, C=C-NH), 7.64 (2H, d,  $J = 6.75$  Hz, ArH), 7.59 (2H, d,  $J = 6.90$  Hz, ArH), 7.51 (3H, t,  $J = 7.15$  Hz, ArH), 7.47 (2H, d,  $J = 7.60$  Hz, ArH), 7.42–7.37 (5H, m, ArH), 7.27 (1H, t,  $J = 7.15$  Hz, ArH), 7.07–7.02 (4H, m, ArH), 5.07 (1H, s, Ar-CH);  $^{13}C$  NMR (125 MHz,  $DMSO-d_6$ ):  $\delta$  (ppm) 197.2, 160.1 (d,  $^1J_{C-F} = 244.3$  Hz), 150.0, 144.9, 135.7, 135.4, 134.7, 133.4, 130.8, 129.4, 129.1, 128.9, 128.4, 128.1, 127.3, 126.2, 121.2, 115.4 (d,  $^2J_{C-F} = 22.3$  Hz), 114.4, 82.0, 46.2; HRMS (ESI-TOF): calcd for  $C_{31}H_{23}N_3SF$  [ $M + H$ ] $^+$ , 488.1597, found 488.1602.

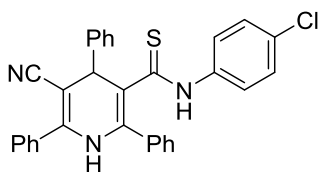

**N-(4-Chlorophenyl)-5-cyano-2,4,6-triphenyl-1,4-dihydropyridine-3-carbothioamide (4h).** Yellow powder (216.7 mg, 86%); mp: 216–219 °C;  $^1H$  NMR (500 MHz,  $DMSO-d_6$ ):  $\delta$  (ppm) 10.76 (1H, s, C(=S)-NH), 9.56 (1H, s, C=C-NH), 7.63 (2H, d,  $J = 5.30$  Hz, ArH), 7.60 (2H, d,  $J = 6.40$  Hz, ArH), 7.51 (3H, t,  $J = 6.90$  Hz, ArH), 7.47 (2H, d,  $J = 7.60$  Hz, ArH), 7.39–7.33 (5H, m, ArH), 7.27 (3H, d,  $J = 7.90$  Hz, ArH), 7.14 (2H, d,  $J = 6.70$  Hz, ArH), 5.05 (1H, s, Ar-CH);  $^{13}C$  NMR (125 MHz,  $DMSO-d_6$ ):  $\delta$  (ppm) 197.2, 149.9, 145.0, 138.3, 136.0, 134.7, 133.3, 130.9, 130.1, 129.5, 129.4, 129.2, 128.9, 128.6, 128.4, 128.1, 127.3, 125.4, 121.1, 114.3, 82.2, 46.1; HRMS (ESI-TOF): calcd for  $C_{31}H_{23}N_3SCl$  [ $M + H$ ] $^+$ , 504.1301, found 504.1305.

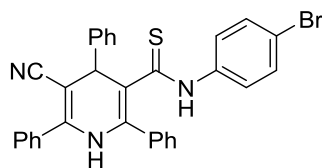

***N*-(4-Bromophenyl)-5-cyano-2,4,6-triphenyl-1,4-dihydropyridine-3-carbothioamide (4i).**

Yellow powder (205.7 mg, 75%); mp: 223–224 °C; <sup>1</sup>H NMR (500 MHz, DMSO-*d*<sub>6</sub>): δ (ppm) 10.73 (1H, s, C(=S)-NH), 9.53 (1H, s, C=C-NH), 7.62 (2H, s, ArH), 7.59 (2H, d, *J* = 6.40 Hz, ArH), 7.51 (3H, t, *J* = 6.38 Hz, ArH), 7.47 (2H, d, *J* = 7.55 Hz, ArH), 7.39–7.34 (7H, m, ArH), 7.26 (1H, t, *J* = 7.10 Hz, ArH), 7.09 (2H, s, ArH), 5.05 (1H, s, Ar-CH); <sup>13</sup>C NMR (125 MHz, DMSO-*d*<sub>6</sub>): δ (ppm) 197.2, 149.8, 145.0, 138.7, 136.0, 134.6, 133.3, 131.4, 130.8, 129.3, 129.1, 128.8, 128.4, 128.0, 127.3, 125.7, 121.1, 118.4, 114.4, 82.2, 46.1; HRMS (ESI-TOF): calcd for C<sub>31</sub>H<sub>23</sub>N<sub>3</sub>SBr [M + H]<sup>+</sup>, 548.0796, found 548.0781.

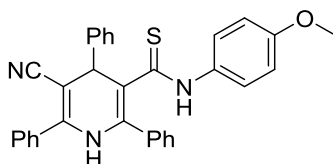

**5-Cyano-*N*-(4-methoxyphenyl)-2,4,6-triphenyl-1,4-dihydropyridine-3-carbothioamide (4j).**

Yellow powder (232.3 mg, 93%); mp: 209–211 °C; <sup>1</sup>H NMR (500 MHz, DMSO-*d*<sub>6</sub>): δ (ppm) 10.56 (1H, s, C(=S)-NH), 9.40 (1H, s, C=C-NH), 7.65 (2H, d, *J* = 7.30 Hz, ArH), 7.59 (2H, d, *J* = 6.80 Hz, ArH), 7.51–7.47 (5H, m, ArH), 7.41–7.36 (5H, m, ArH), 7.26 (1H, t, *J* = 7.20 Hz, ArH), 6.91 (2H, d, *J* = 8.65 Hz, ArH), 6.76 (2H, d, *J* = 8.70 Hz, ArH), 5.09 (1H, s, Ar-CH), 3.67 (3H, s, OCH<sub>3</sub>); <sup>13</sup>C NMR (125 MHz, DMSO-*d*<sub>6</sub>): δ (ppm) 196.2, 157.6, 150.0, 144.9, 134.7, 133.4, 132.3, 130.8, 129.3, 129.1, 128.8, 128.3, 128.2, 127.2, 125.5, 121.2, 114.6, 113.7, 81.8, 55.6, 46.2; HRMS (ESI-TOF): calcd for C<sub>32</sub>H<sub>26</sub>N<sub>3</sub>OS [M + H]<sup>+</sup>, 500.1797, found 500.1789.

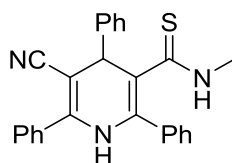

**5-Cyano-*N*-methyl-2,4,6-triphenyl-1,4-dihydropyridine-3-carbothioamide (4k).**

Yellow powder (163.0 mg, 80%); mp: 163–165 °C; <sup>1</sup>H NMR (500 MHz, DMSO-*d*<sub>6</sub>): δ (ppm) 9.20 (2H, s, C=C-NH and C(=S)-NH), 7.55 (2H, d, *J* = 7.35 Hz, ArH), 7.51–7.45 (5H, m, ArH), 7.37–7.34 (7H, m, ArH), 7.25 (1H, t, *J* = 6.58 Hz, ArH), 5.07 (1H, s, Ar-CH), 2.49 (3H, s, NH-CH<sub>3</sub>); <sup>13</sup>C NMR (125 MHz, DMSO-*d*<sub>6</sub>): δ (ppm) 197.5, 150.0, 144.9, 134.7, 133.5, 130.6, 129.0, 128.9, 128.7, 128.2, 128.0, 127.3, 121.2, 114.7, 81.6, 46.2, 32.3; HRMS (ESI-TOF): calcd for C<sub>26</sub>H<sub>22</sub>N<sub>3</sub>S [M + H]<sup>+</sup>, 408.1534, found 408.1542.

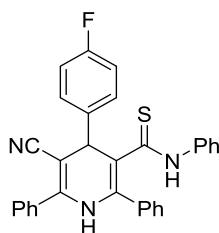

**5-Cyano-4-(4-fluorophenyl)-*N*,2,6-triphenyl-1,4-dihydropyridine-3-carbothioamide (4l).**

Yellow powder (207.2 mg, 85%); mp: 228–231 °C; <sup>1</sup>H NMR (500 MHz, DMSO-*d*<sub>6</sub>): δ (ppm) 10.73 (1H, s, C(=S)-NH), 9.51 (1H, s, C=C-NH), 7.64 (2H, d, *J* = 6.95 Hz, ArH), 7.60 (2H, d, *J* = 6.65 Hz, ArH), 7.51–7.49 (5H, m, ArH), 7.40 (2H, t, *J* = 6.98 Hz, ArH), 7.36 (1H, d, *J* = 6.95 Hz, ArH), 7.21 (4H, t, *J* = 7.93 Hz, ArH), 7.11 (1H, t, *J* = 7.20 Hz, ArH), 7.03 (2H, d, *J* = 7.40 Hz, ArH), 5.09 (1H, s, Ar-CH); <sup>13</sup>C NMR (125 MHz, DMSO-*d*<sub>6</sub>): δ (ppm) 197.4, 162.2 (d, <sup>1</sup>*J*<sub>C-F</sub> = 242.6 Hz), 150.6, 141.8, 139.9, 135.8, 135.2, 133.9, 131.4, 130.6, 129.9, 129.7, 129.4, 129.1, 128.9, 127.0, 124.6, 121.6, 116.0 (d, <sup>2</sup>*J*<sub>C-F</sub> = 20.7 Hz), 115.0, 82.5, 46.1; HRMS (ESI-TOF): calcd for C<sub>31</sub>H<sub>23</sub>N<sub>3</sub>SF [M + H]<sup>+</sup>, 488.1597, found 488.1586.

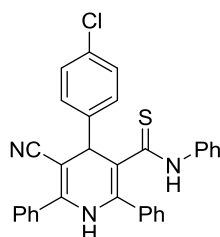

**4-(4-Chlorophenyl)-5-cyano-*N*,2,6-triphenyl-1,4-dihydropyridine-3-carbothioamide (4m).**  
 Yellow powder (229.3 mg, 91%); mp: 215–217 °C; <sup>1</sup>H NMR (500 MHz, DMSO-*d*<sub>6</sub>): δ (ppm) 10.76 (1H, s, C(=S)-NH), 9.58 (1H, s, C=C-NH), 7.65 (2H, d, *J* = 6.90 Hz, ArH), 7.61 (2H, d, *J* = 6.50 Hz, ArH), 7.53–7.48 (5H, m, ArH), 7.45 (2H, d, *J* = 8.35 Hz, ArH), 7.41 (2H, t, *J* = 7.23 Hz, ArH), 7.37 (1H, d, *J* = 6.90 Hz, ArH), 7.22 (2H, t, *J* = 7.58 Hz, ArH), 7.11 (1H, t, *J* = 7.35 Hz, ArH), 7.06 (2H, d, *J* = 7.65 Hz, ArH), 5.07 (1H, s, Ar-CH); <sup>13</sup>C NMR (125 MHz, DMSO-*d*<sub>6</sub>): δ (ppm) 196.6, 150.2, 144.0, 139.4, 135.8, 134.7, 133.3, 132.0, 131.0, 130.0, 129.5, 129.3, 129.0, 128.9, 128.7, 128.5, 126.6, 124.1, 121.2, 114.0, 81.6, 45.6; HRMS (ESI-TOF): calcd for C<sub>31</sub>H<sub>23</sub>N<sub>3</sub>SCl [M + H]<sup>+</sup>, 504.1301, found 504.1309.

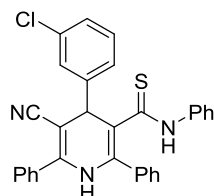

**4-(3-Chlorophenyl)-5-cyano-*N*,2,6-triphenyl-1,4-dihydropyridine-3-carbothioamide (4n).**  
 Yellow powder (196.6 mg, 78%); mp: 204–206 °C; <sup>1</sup>H NMR (500 MHz, DMSO-*d*<sub>6</sub>): δ (ppm) 10.83 (1H, s, C(=S)-NH), 9.62 (1H, s, C=C-NH), 7.66 (2H, d, *J* = 7.35 Hz, ArH), 7.61 (2H, d, *J* = 6.60 Hz, ArH), 7.52 (3H, t, *J* = 6.75 Hz, ArH), 7.48 (1H, s, ArH), 7.42 (4H, t, *J* = 7.55 Hz, ArH), 7.37 (1H, d, *J* = 7.05 Hz, ArH), 7.35 (1H, d, *J* = 3.55 Hz, ArH), 7.22 (2H, t, *J* = 7.58 Hz, ArH), 7.12 (1H, t, *J* = 7.25 Hz, ArH), 7.06 (2H, d, *J* = 7.65 Hz, ArH), 5.08 (1H, s, Ar-CH); <sup>13</sup>C NMR (125 MHz, DMSO-*d*<sub>6</sub>): δ (ppm) 196.5, 150.4, 147.4, 139.4, 136.0, 134.6, 133.6, 133.2, 131.1, 130.8, 129.7, 129.5, 129.3, 129.0, 128.7, 128.5, 127.9, 127.4, 127.0, 126.6, 124.1, 121.1, 113.6, 81.4, 45.8; HRMS (ESI-TOF): calcd for C<sub>31</sub>H<sub>23</sub>N<sub>3</sub>SCl [M + H]<sup>+</sup>, 504.1301, found 504.1299.

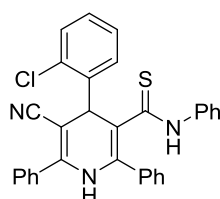

**4-(2-Chlorophenyl)-5-cyano-*N*,2,6-triphenyl-1,4-dihydropyridine-3-carbothioamide (4o).**  
 Yellow powder (151.2 mg, 60%); mp: 203–205 °C; <sup>1</sup>H NMR (500 MHz, DMSO-*d*<sub>6</sub>): δ (ppm) 10.81

(1H, s, C(=S)-NH), 9.57 (1H, s, C=C-NH), 7.71 (1H, d,  $J = 7.50$  Hz, ArH), 7.67 (2H, d,  $J = 7.15$  Hz, ArH), 7.57 (2H, d,  $J = 6.85$  Hz, ArH), 7.50 (3H, t,  $J = 7.65$  Hz, ArH), 7.43–7.36 (5H, m, ArH), 7.27 (1H, t,  $J = 7.23$  Hz, ArH), 7.20 (2H, t,  $J = 7.58$  Hz, ArH), 7.09 (3H, t,  $J = 9.18$  Hz, ArH), 5.60 (1H, s, Ar-CH);  $^{13}\text{C}$  NMR (125 MHz, DMSO- $d_6$ ):  $\delta$  (ppm) 196.2, 150.4, 142.8, 139.4, 136.4, 134.7, 133.3, 132.1, 131.3, 131.0, 129.7, 129.6, 129.5, 129.3, 129.0, 128.7, 128.5, 128.2, 126.5, 124.0, 120.8, 113.9, 81.3, 42.3; HRMS (ESI-TOF): calcd for  $\text{C}_{31}\text{H}_{23}\text{N}_3\text{SCl}$  [ $\text{M} + \text{H}$ ] $^+$ , 504.1301, found 504.1322.

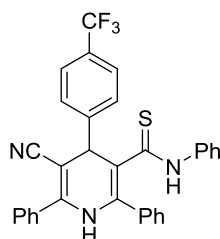

**5-Cyano-*N*,2,6-triphenyl-4-(4-(trifluoromethyl)phenyl)-1,4-dihydropyridine-3-carbothioamide (4p).** Yellow powder (231.2 mg, 86%); mp: 253–255 °C.  $^1\text{H}$  NMR (500 MHz, DMSO- $d_6$ ):  $\delta$  (ppm) 10.79 (1H, s, C(=S)-NH), 9.68 (1H, s, C=C-NH), 7.77 (2H, d,  $J = 8.10$  Hz, ArH), 7.70–7.66 (4H, m, ArH) 7.61 (2H, d,  $J = 6.65$  Hz, ArH), 7.54–7.51 (3H, m, ArH), 7.43–7.37 (3H, m, ArH), 7.21 (2H, t,  $J = 7.55$  Hz, ArH), 7.12–7.06 (3H, m, ArH), 5.13 (1H, s, Ar-CH);  $^{13}\text{C}$  NMR (125 MHz, DMSO- $d_6$ ):  $\delta$  (ppm) 196.4, 150.6, 149.6, 139.4, 136.5, 134.6, 133.2, 131.2, 129.7, 129.6, 129.3, 129.0, 128.9, 128.7, 128.6, 128.0 (q,  $^2J_{\text{C-F}} = 31.7$  Hz), 126.6, 125.0 (d,  $^1J_{\text{C-F}} = 240.0$  Hz), 121.1, 113.4, 81.3, 46.0; HRMS (ESI-TOF): calcd for  $\text{C}_{32}\text{H}_{23}\text{N}_3\text{SF}_3$  [ $\text{M} + \text{H}$ ] $^+$ , 538.1565, found 538.1552.

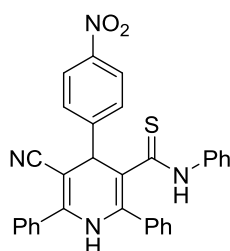

**5-Cyano-4-(4-nitrophenyl)-*N*,2,6-triphenyl-1,4-dihydropyridine-3-carbothioamide (4q).** Yellow powder (234.1 mg, 91%); mp: 258–260 °C;  $^1\text{H}$  NMR (500 MHz, DMSO- $d_6$ ):  $\delta$  (ppm) 10.84 (1H, s, C(=S)-NH), 9.77 (1H, s, C=C-NH), 8.28 (2H, d,  $J = 8.50$  Hz, ArH), 7.75 (2H, d,  $J = 8.55$  Hz, ArH), 7.68 (2H, d,  $J = 7.15$  Hz, ArH), 7.61 (2H, t,  $J = 6.65$  Hz, ArH), 7.54–7.50 (3H, m, ArH), 7.42 (2H, t,  $J = 7.05$  Hz, ArH), 7.37 (1H, t,  $J = 7.13$  Hz, ArH), 7.21 (2H, t,  $J = 7.40$  Hz, ArH), 7.10 (3H, d,  $J = 6.85$  Hz, ArH), 5.16 (1H, s, Ar-CH);  $^{13}\text{C}$  NMR (125 MHz, DMSO- $d_6$ ):  $\delta$  (ppm) 196.1, 152.5, 150.7, 147.0, 139.4, 136.9, 134.5, 133.0, 131.2, 129.8, 129.6, 129.3, 129.0, 128.7, 128.6, 126.6, 124.3, 123.9, 120.9, 112.9, 80.9, 45.9; HRMS (ESI-TOF): calcd for  $\text{C}_{31}\text{H}_{23}\text{N}_4\text{O}_2\text{S}$  [ $\text{M} + \text{H}$ ] $^+$ , 515.1542, found 515.1550.

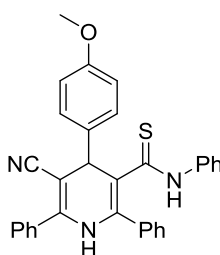

**5-Cyano-4-(4-methoxyphenyl)-N,2,6-triphenyl-1,4-dihydropyridine-3-carbothioamide (4r).**

Yellow powder (204.8 mg, 82%); mp: 235–238 °C; <sup>1</sup>H NMR (500 MHz, DMSO-*d*<sub>6</sub>): δ (ppm) 10.67 (1H, s, C(=S)-NH), 9.41 (1H, s, C=C-NH), 7.63 (2H, s, ArH), 7.58 (2H, s, ArH), 7.51 (3H, s, ArH), 7.38 (5H, d, *J* = 7.05 Hz, ArH), 7.20 (2H, d, *J* = 6.35 Hz, ArH), 7.10 (1H, t, *J* = 6.25 Hz, ArH), 7.05 (2H, d, *J* = 5.45 Hz, ArH), 6.94 (2H, d, *J* = 7.55 Hz, ArH), 5.03 (1H, s, Ar-CH), 3.75 (1H, s, OCH<sub>3</sub>); <sup>13</sup>C NMR (125 MHz, DMSO-*d*<sub>6</sub>): δ (ppm) 197.1, 158.7, 149.8, 139.5, 137.4, 135.0, 134.9, 133.5, 130.9, 129.4, 129.3, 129.2, 128.9, 128.6, 128.4, 126.5, 124.2, 121.4, 115.0, 114.2, 82.4, 55.5, 45.5; HRMS (ESI-TOF): calcd for C<sub>32</sub>H<sub>26</sub>N<sub>3</sub>OS [M + H]<sup>+</sup>, 500.1797, found 500.1785.

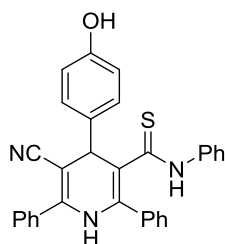

**5-Cyano-4-(4-hydroxyphenyl)-N,2,6-triphenyl-1,4-dihydropyridine-3-carbothioamide (4s).**

Yellow powder (220.9 mg, 91%); mp: 178–180 °C; <sup>1</sup>H NMR (500 MHz, DMSO-*d*<sub>6</sub>): δ (ppm) 10.63 (1H, s, C(=S)-NH), 9.33 (1H, s, C=C-NH), 9.31 (1H, s, OH), 7.63 (2H, d, *J* = 6.55 Hz, ArH), 7.59 (2H, d, *J* = 6.40 Hz, ArH), 7.53–7.49 (3H, m, ArH), 7.40–7.33 (3H, m, ArH), 7.26 (2H, d, *J* = 8.15 Hz, ArH), 7.21 (2H, t, *J* = 7.43 Hz, ArH), 7.10 (1H, t, *J* = 7.13 Hz, ArH), 7.03 (2H, d, *J* = 7.25 Hz, ArH), 6.75 (2H, d, *J* = 8.15 Hz, ArH), 5.00 (1H, s, Ar-CH); <sup>13</sup>C NMR (125 MHz, DMSO-*d*<sub>6</sub>): δ (ppm) 197.3, 156.8, 149.7, 139.4, 135.7, 135.0, 134.4, 133.6, 130.8, 129.3, 129.2, 128.9, 128.6, 128.4, 126.5, 124.3, 121.5, 115.6, 82.5, 45.6; HRMS (ESI-TOF): calcd for C<sub>31</sub>H<sub>24</sub>N<sub>3</sub>OS [M + H]<sup>+</sup>, 486.1640, found 486.1629.

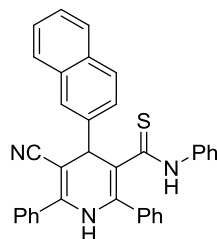

**5-Cyano-4-(naphthalen-2-yl)-N,2,6-triphenyl-1,4-dihydropyridine-3-carbothioamide (4t).**

Yellow powder (220.9 mg, 85%); mp: 237–240 °C; <sup>1</sup>H NMR (500 MHz, DMSO-*d*<sub>6</sub>): δ (ppm) 10.78 (1H, s, C(=S)-NH), 9.55 (1H, s, C=C-NH), 7.94 (2H, broad, s, ArH), 7.89 (2H, broad, s, ArH), 7.73–7.69 (3H, m, ArH), 7.61 (2H, broad, s, ArH), 7.51 (5H, broad, s, ArH), 7.41 (2H, t, *J* = 6.20 Hz, ArH), 7.37 (1H, d, *J* = 6.30 Hz, ArH), 7.16 (2H, t, *J* = 6.95 Hz, ArH), 7.08 (1H, t, *J* = 6.60 Hz, ArH), 7.01 (2H, d, *J* = 6.60 Hz, ArH), 5.28 (1H, s, Ar-CH); <sup>13</sup>C NMR (125 MHz, DMSO-*d*<sub>6</sub>): δ (ppm) 196.9, 150.2, 142.5, 139.4, 135.5, 134.9, 133.5, 132.8, 131.0, 129.5, 129.3, 129.0, 128.7, 128.5, 128.0, 127.0, 126.6, 126.3, 124.2, 121.4, 114.5, 82.0, 46.5; HRMS (ESI-TOF): calcd for C<sub>35</sub>H<sub>26</sub>N<sub>3</sub>S [M + H]<sup>+</sup>, 520.1847, found 520.1839.

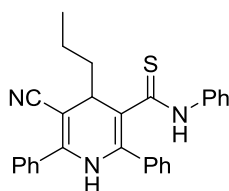

**5-Cyano-N,2,6-triphenyl-4-propyl-1,4-dihydropyridine-3-carbothioamide (4u).** Yellow



powder (189.5 mg, 87%); mp: 208–211 °C; <sup>1</sup>H NMR (500 MHz, DMSO-*d*<sub>6</sub>): δ (ppm) 10.79 (1H, s, C(=S)-NH), 9.53 (1H, s, C=C-NH), 7.65 (2H, s, ArH), 7.58 (2H, d, *J* = 6.55 Hz, ArH), 7.54 (3H, t, *J* = 2.48 Hz, ArH), 7.38 (2H, t, *J* = 6.75 Hz, ArH), 7.34 (1H, d, *J* = 7.30 Hz, ArH), 7.24 (4H, s, ArH), 7.13–7.12 (1H, m, ArH), 3.67 (1H, s, C<sub>3</sub>H<sub>7</sub>-CH), 1.92–1.90 (1H, m, CH<sub>3</sub>-CH<sub>2</sub>), 1.74–1.69 (2H, m, C<sub>2</sub>H<sub>5</sub>-CH<sub>2</sub>), 1.53–1.47 (1H, m, CH<sub>3</sub>-CH<sub>2</sub>), 0.99 (3H, t, *J* = 7.18 Hz, CH<sub>3</sub>); <sup>13</sup>C NMR (125 MHz, DMSO-*d*<sub>6</sub>): δ (ppm) 197.1, 151.0, 139.8, 136.8, 135.1, 133.5, 131.1, 129.5, 129.1, 128.7, 128.6, 126.4, 124.0, 122.0, 114.8, 79.8, 18.6, 14.7; HRMS (ESI-TOF): calcd for C<sub>28</sub>H<sub>26</sub>N<sub>3</sub>S [M + H]<sup>+</sup>, 436.1847, found 436.1859.

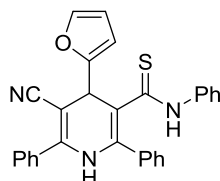

**5-Cyano-4-(furan-2-yl)-N,2,6-triphenyl-1,4-dihydropyridine-3-carbothioamide (4v).** Yellow powder (188.4 mg, 82%); mp: 216–218 °C; <sup>1</sup>H NMR (500 MHz, DMSO-*d*<sub>6</sub>): δ (ppm) 10.80 (1H, s, C(=S)-NH), 9.65 (1H, s, C=C-NH), 7.63–7.60 (5H, m, ArH), 7.52 (3H, d, *J* = 6.70 Hz, ArH), 7.39 (2H, t, *J* = 7.10 Hz, ArH), 7.36 (1H, d, *J* = 7.00 Hz, ArH), 7.22 (2H, t, *J* = 7.25 Hz, ArH), 7.17 (2H, d, *J* = 6.85 Hz, ArH), 7.11 (1H, t, *J* = 6.98 Hz, ArH), 6.42 (1H, s, O-CH=CH), 6.34 (1H, s, O-C=CH), 5.17 (1H, s, C<sub>4</sub>H<sub>4</sub>O-CH); <sup>13</sup>C NMR (125 MHz, DMSO-*d*<sub>6</sub>): δ (ppm) 196.4, 156.8, 150.8, 142.9, 139.7, 136.4, 134.7, 133.3, 131.1, 129.6, 129.4, 129.0, 128.7, 128.6, 126.5, 124.0, 121.1, 111.9, 111.1, 107.0, 79.1; HRMS (ESI-TOF): calcd for C<sub>29</sub>H<sub>22</sub>N<sub>3</sub>SO [M + H]<sup>+</sup>, 460.1484, found 460.1490.

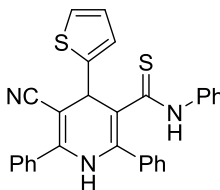

**5-Cyano-N,2,6-triphenyl-4-(thiophen-2-yl)-1,4-dihydropyridine-3-carbothioamide (4w).** Yellow powder (202.1 mg, 85%); mp: 198–200 °C; <sup>1</sup>H NMR (500 MHz, DMSO-*d*<sub>6</sub>): δ (ppm) 10.71 (1H, s, C(=S)-NH), 9.85 (1H, s, C=C-NH), 7.65–7.62 (4H, m, ArH), 7.56 (3H, s, ArH), 7.43–7.35 (4H, m, ArH), 7.22 (2H, t, *J* = 7.00 Hz, ArH), 7.18 (2H, s, ArH), 7.11 (2H, t, *J* = 6.00 Hz, ArH), 7.02 (1H, t, *J* = 3.70 Hz, ArH), 5.26 (1H, s, C<sub>4</sub>H<sub>4</sub>S-CH); <sup>13</sup>C NMR (125 MHz, DMSO-*d*<sub>6</sub>): δ (ppm) 196.1, 150.3, 149.4, 139.7, 136.7, 134.5, 133.1, 131.1, 129.6, 129.3, 129.0, 128.6, 128.5, 127.2, 126.3, 125.3, 124.6, 123.9, 121.0, 114.1, 81.2; HRMS (ESI-TOF): calcd for C<sub>29</sub>H<sub>22</sub>N<sub>3</sub>S<sub>2</sub> [M + H]<sup>+</sup>, 476.1255, found 476.1240.

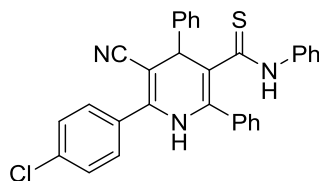

**6-(4-Chlorophenyl)-5-cyano-N,2,4-triphenyl-1,4-dihydropyridine-3-carbothioamide (4y).** Yellow powder (229.3 mg, 91%); mp: 214–217 °C; <sup>1</sup>H NMR (500 MHz, DMSO-*d*<sub>6</sub>): δ (ppm) 10.70 (1H, s, C(=S)-NH), 9.50 (1H, s, C=C-NH), 7.65 (2H, d, *J* = 6.80 Hz, ArH), 7.62 (2H, d, *J* = 8.50 Hz, ArH), 7.57 (2H, d, *J* = 8.40 Hz, ArH), 7.47 (2H, d, *J* = 7.45 Hz, ArH), 7.41–7.37 (5H, m, ArH), 7.27 (1H, t, *J* = 7.10 Hz, ArH), 7.20 (2H, t, *J* = 7.53 Hz, ArH), 7.10 (1H, t, *J* = 7.20 Hz, ArH), 7.02

(2H, d,  $J = 7.40$  Hz, ArH), 5.10 (1H, s, Ar-CH);  $^{13}\text{C}$  NMR (125 MHz,  $\text{DMSO-}d_6$ ):  $\delta$  (ppm) 196.8, 148.9, 144.8, 139.3, 135.5, 135.0, 134.7, 132.2, 131.1, 129.4, 128.9, 128.8, 128.5, 128.4, 128.2, 127.3, 126.5, 124.1, 121.0, 114.7, 82.4, 46.2; HRMS (ESI-TOF): calcd for  $\text{C}_{31}\text{H}_{23}\text{N}_3\text{SCl}$  [ $\text{M} + \text{H}$ ] $^+$ , 504.1301, found 504.1312.

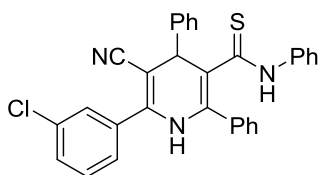

**6-(3-Chlorophenyl)-5-cyano-*N*,2,4-triphenyl-1,4-dihydropyridine-3-carbothioamide (4z).**

Yellow powder (224.3 mg, 89%); mp: 193–195 °C;  $^1\text{H}$  NMR (500 MHz,  $\text{DMSO-}d_6$ ):  $\delta$  (ppm) 10.66 (1H, s, C(=S)-NH), 9.46 (1H, s, C=C-NH), 7.62–7.59 (4H, m, ArH), 7.56 (2H, broad, s, ArH), 7.48 (2H, broad, s, ArH), 7.39 (5H, broad, s, ArH), 7.28 (1H, broad, s, ArH), 7.20 (2H, broad, s, ArH), 7.10 (1H, broad, s, ArH), 6.98 (2H, broad, s, ArH), 5.15 (1H, s, Ar-CH);  $^{13}\text{C}$  NMR (125 MHz,  $\text{DMSO-}d_6$ ):  $\delta$  (ppm) 197.0, 148.7, 144.8, 139.4, 135.5, 134.8, 134.6, 133.5, 130.9, 130.8, 129.4, 129.0, 128.7, 128.5, 128.2, 127.5, 126.6, 124.3, 120.9, 115.0, 82.8, 46.4; HRMS (ESI-TOF): calcd for  $\text{C}_{31}\text{H}_{23}\text{N}_3\text{SCl}$  [ $\text{M} + \text{H}$ ] $^+$ , 504.1301, found 504.1309.

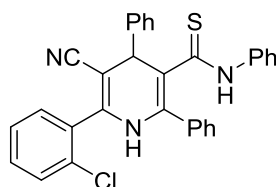

**6-(2-Chlorophenyl)-5-cyano-*N*,2,4-triphenyl-1,4-dihydropyridine-3-carbothioamide (4aa).**

Yellow powder (211.7 mg, 84%); mp: 234–236 °C;  $^1\text{H}$  NMR (500 MHz,  $\text{DMSO-}d_6$ ):  $\delta$  (ppm) 10.63 (1H, s, C(=S)-NH), 9.42 (1H, s, C=C-NH), 7.58 (4H, broad, s, ArH), 7.52 (3H, broad, s, ArH), 7.45–7.27 (7H, m, ArH), 7.18 (2H, broad, s, ArH), 7.09 (1H, broad, s, ArH), 6.93 (2H, broad, s, ArH), 5.30 (1H, s, Ar-CH);  $^{13}\text{C}$  NMR (125 MHz,  $\text{DMSO-}d_6$ ):  $\delta$  (ppm) 197.2, 147.8, 144.5, 139.2, 134.7, 133.2, 132.9, 131.8, 130.0, 129.1, 128.7, 128.3, 127.8, 127.4, 126.6, 124.4, 120.1, 115.3, 84.3, 46.5; HRMS (ESI-TOF): calcd for  $\text{C}_{31}\text{H}_{23}\text{N}_3\text{SCl}$  [ $\text{M} + \text{H}$ ] $^+$ , 504.1301, found 504.1316.

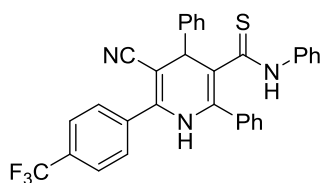

**5-Cyano-*N*,2,4-triphenyl-6-(4-(trifluoromethyl)phenyl)-1,4-dihydropyridine-3-carbothioamide (4bb).**

Yellow powder (182.8 mg, 68%); mp: 223–226 °C;  $^1\text{H}$  NMR (500 MHz,  $\text{DMSO-}d_6$ ):  $\delta$  (ppm) 10.73 (1H, s, C(=S)-NH), 9.55 (1H, s, C=C-NH), 7.87 (2H, broad, s, ArH), 7.82 (2H, broad, s, ArH), 7.64 (2H, broad, s, ArH), 7.48 (2H, broad, s, ArH), 7.39 (5H, broad, s, ArH), 7.28 (1H, broad, s, ArH), 7.20 (2H, broad, s, ArH), 7.10 (1H, broad, s, ArH), 7.00 (2H, broad, s, ArH), 5.16 (1H, s, Ar-CH);  $^{13}\text{C}$  NMR (125 MHz,  $\text{DMSO-}d_6$ ):  $\delta$  (ppm) 196.9, 148.8, 144.7, 139.3, 137.5, 134.7, 130.9 (d,  $^2J_{\text{C-F}} = 31.7$  Hz), 130.4, 129.6, 129.4, 129.0, 128.7, 128.5, 127.5, 126.6, 125.9, 124.5 (d,  $^1J_{\text{C-F}} = 272.7$  Hz), 124.3, 120.8, 114.9, 83.1, 46.3; HRMS (ESI-TOF): calcd for  $\text{C}_{32}\text{H}_{23}\text{N}_3\text{SF}_3$  [ $\text{M} + \text{H}$ ] $^+$ , 538.1565, found 538.1572.

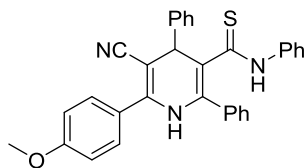

**5-Cyano-6-(4-methoxyphenyl)-N,2,4-triphenyl-1,4-dihydropyridine-3-carbothioamide (4cc).**

Yellow powder (224.8 mg, 90%); mp: 232–234 °C; <sup>1</sup>H NMR (500 MHz, DMSO-*d*<sub>6</sub>): δ (ppm) 10.69 (1H, s, C(=S)-NH), 9.46 (1H, s, C=C-NH), 7.66 (2H, broad, s, ArH), 7.54 (2H, d, *J* = 5.75 Hz, ArH), 7.46 (2H, broad, s, ArH), 7.39–7.37 (5H, m, ArH), 7.25 (1H, broad, s, ArH), 7.20 (2H, broad, s, ArH), 7.06 (5H, broad, s, ArH), 4.99 (1H, s, Ar-CH), 3.80 (3H, s, OCH<sub>3</sub>); <sup>13</sup>C NMR (125 MHz, DMSO-*d*<sub>6</sub>): δ (ppm) 196.9, 161.5, 149.7, 145.3, 139.6, 136.1, 134.9, 130.9, 129.6, 128.9, 128.7, 128.6, 128.1, 127.3, 126.5, 125.5, 124.1, 121.8, 114.3, 81.1, 55.9, 46.1; HRMS (ESI-TOF): calcd for C<sub>32</sub>H<sub>26</sub>N<sub>3</sub>OS [M + H]<sup>+</sup>, 500.1797, found 500.1796.

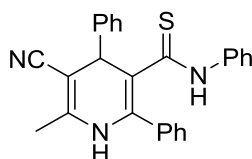

**5-Cyano-6-methyl-N,2,4-triphenyl-1,4-dihydropyridine-3-carbothioamide (4dd).**

Yellow powder (173.2 mg, 85%); mp: 195–197 °C; <sup>1</sup>H NMR (500 MHz, DMSO-*d*<sub>6</sub>): δ (ppm) 10.56 (1H, s, C(=S)-NH), 8.94 (1H, s, C=C-NH), 7.56 (2H, d, *J* = 6.70 Hz, ArH), 7.42–7.33 (7H, m, ArH), 7.24 (1H, t, *J* = 6.80 Hz, ArH), 7.17 (2H, t, *J* = 7.40 Hz, ArH), 7.08 (1H, t, *J* = 7.05 Hz, ArH), 6.90 (2H, d, *J* = 7.65 Hz, ArH), 5.13 (1H, d, *J* = 5.75 Hz, Ar-CH), 2.09 (3H, s, CH<sub>3</sub>); <sup>13</sup>C NMR (125 MHz, DMSO-*d*<sub>6</sub>): δ (ppm) 197.5, 148.0, 144.7, 139.2, 135.1, 133.3, 129.2, 128.9, 128.7, 128.4, 127.2, 126.5, 124.3, 120.8, 115.4, 81.8, 46.0, 18.1; HRMS (ESI-TOF): calcd for C<sub>26</sub>H<sub>22</sub>N<sub>3</sub>S [M + H]<sup>+</sup>, 408.1534, found 408.1542.

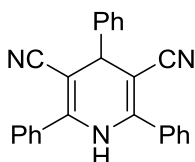

**2,4,6-Triphenyl-1,4-dihydropyridine-3,5-dicarbonitrile (6).**

White powder (25.2 mg, 35%); <sup>1</sup>H NMR (500 MHz, CDCl<sub>3</sub>): δ (ppm) 7.60 (4H, d, *J* = 6.75 Hz, ArH), 7.54–7.47 (6H, m, ArH), 7.46–7.43 (4H, m, ArH), 7.38–7.37 (1H, m, ArH), 6.38 (1H, s, C=C-NH), 4.61 (1H, s, Ar-CH).

SKN-P-01

1H 1D 2014 12 29

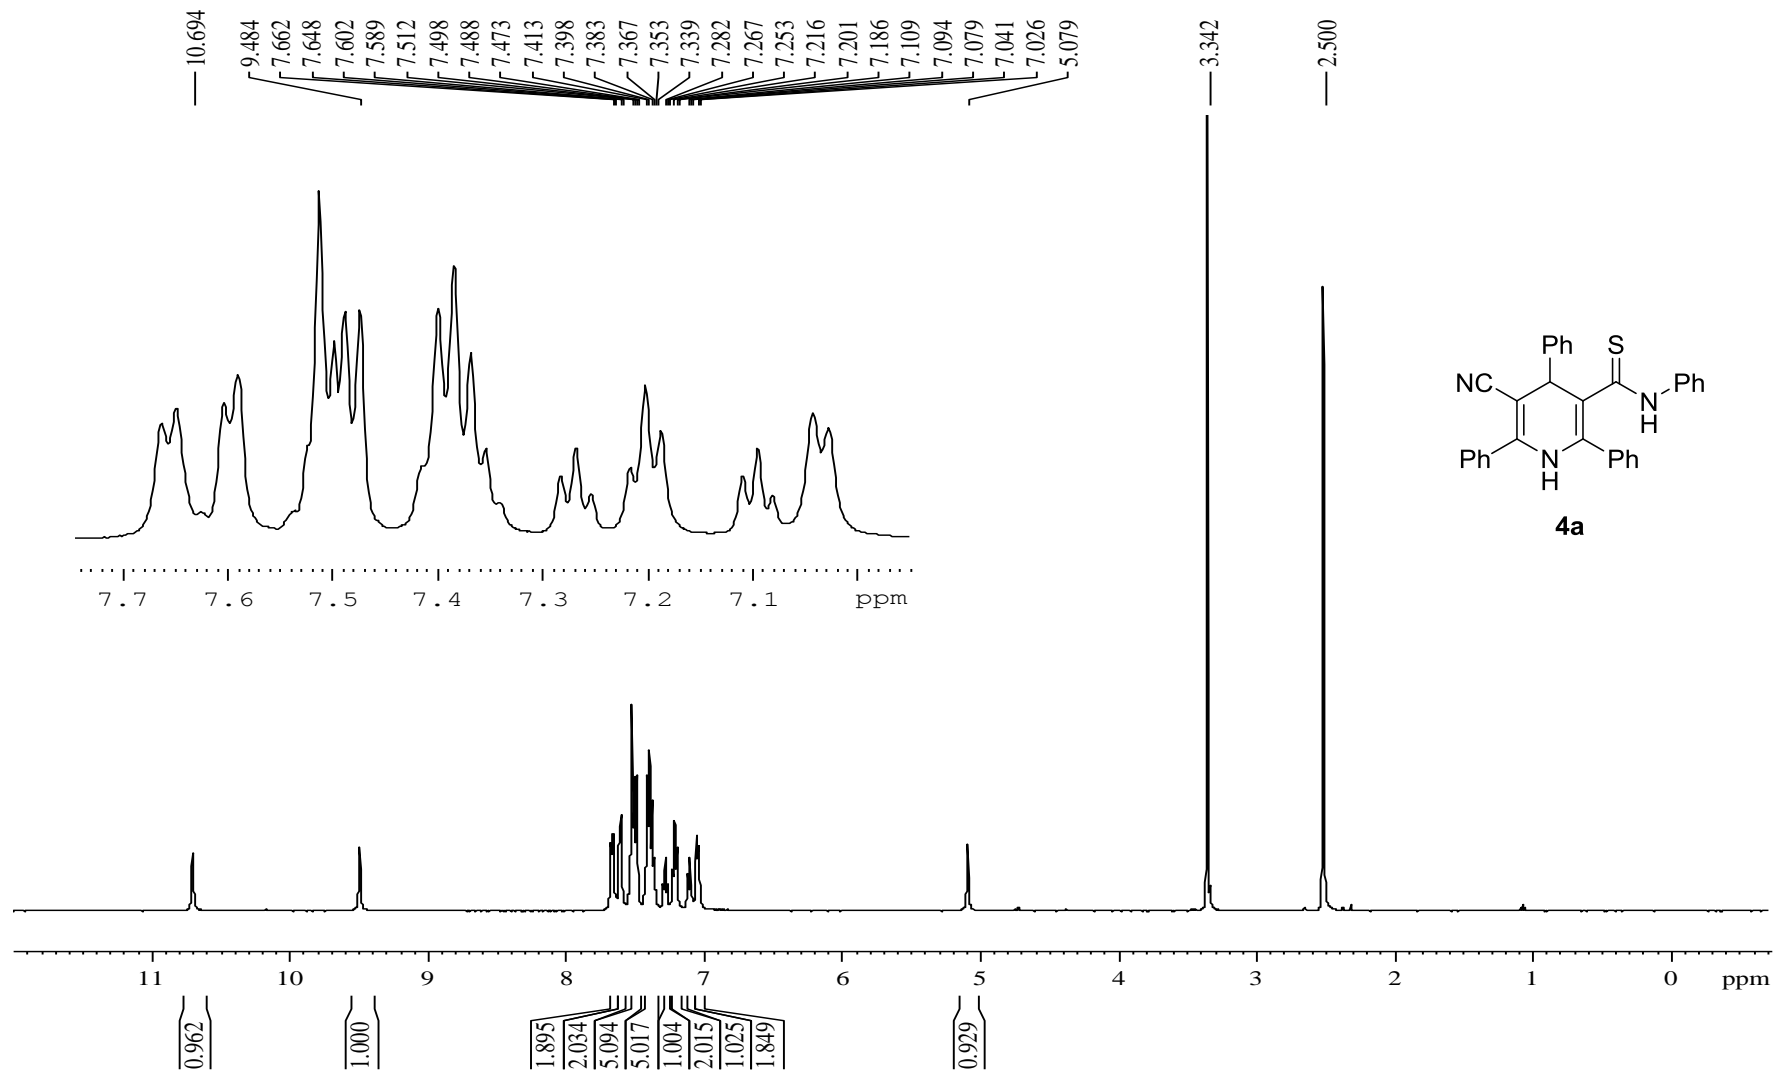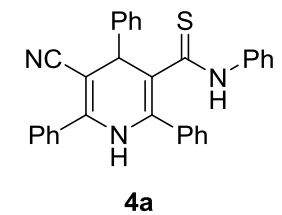

SKN-P-1 13C 2015 04 11

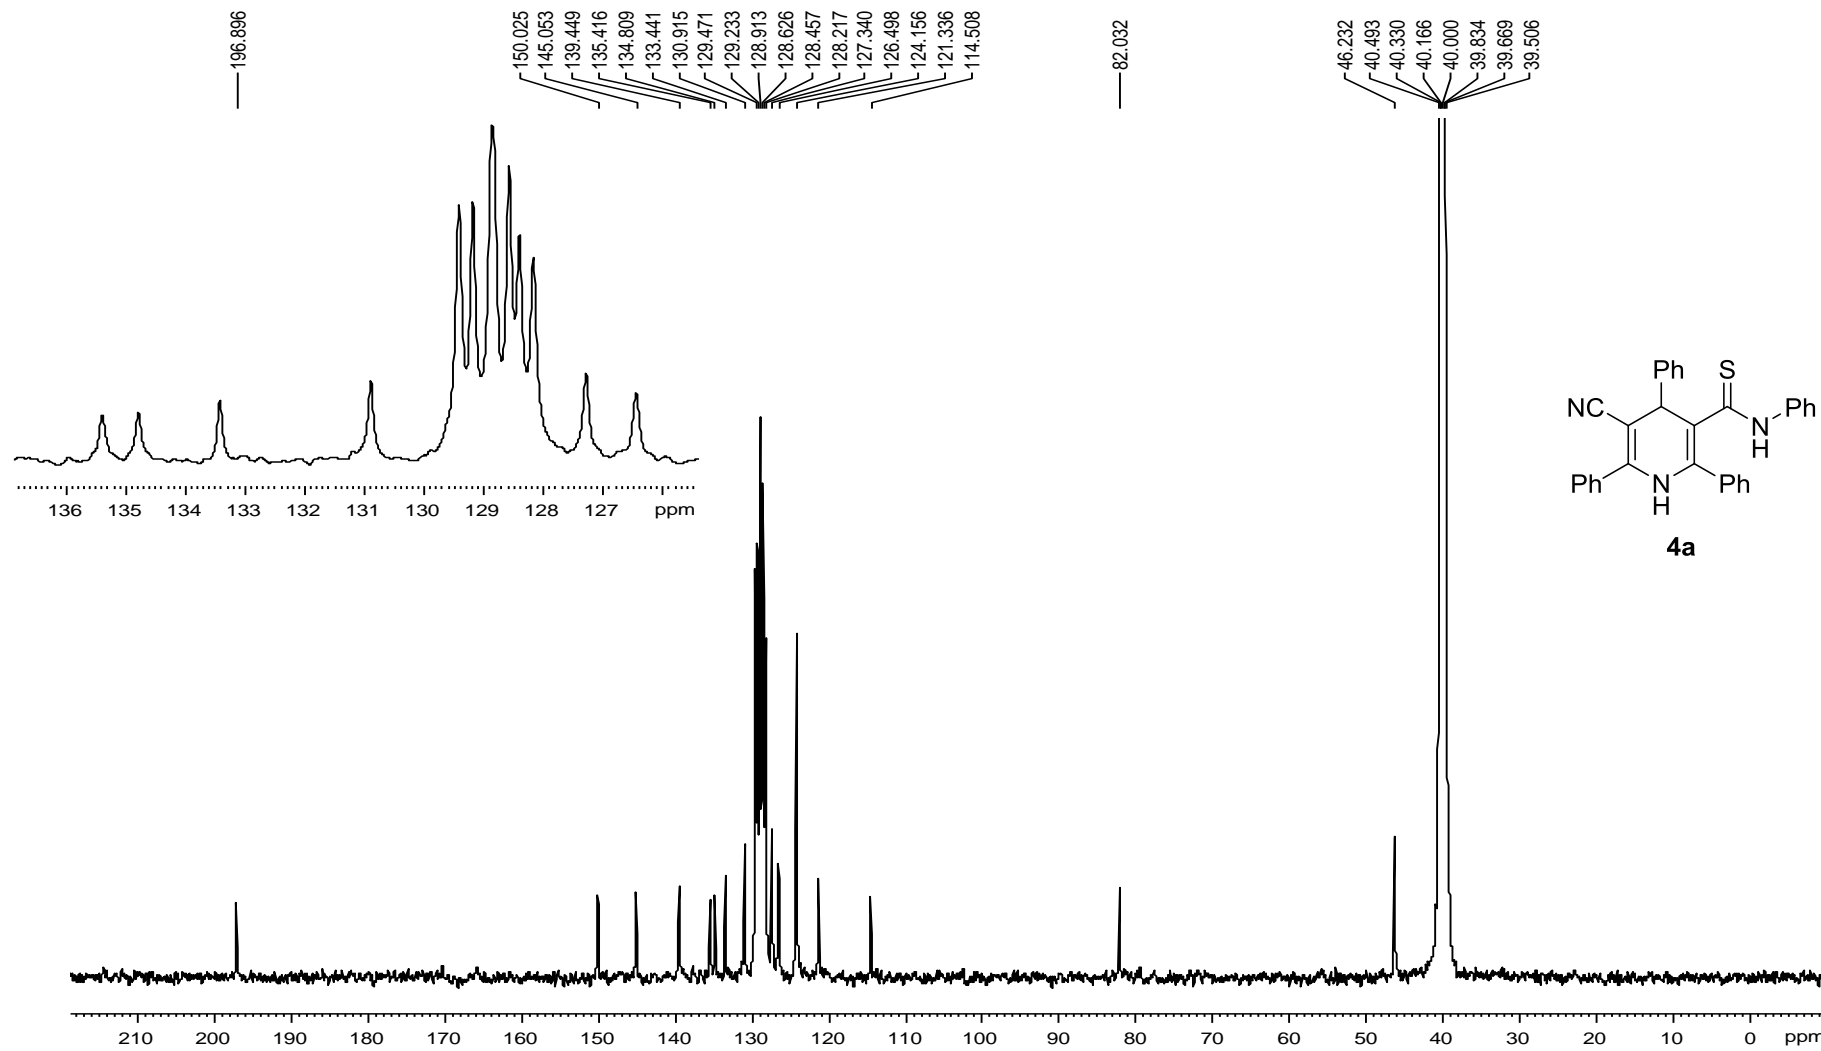

SKN-P-3

1H 1D 2015 01 12

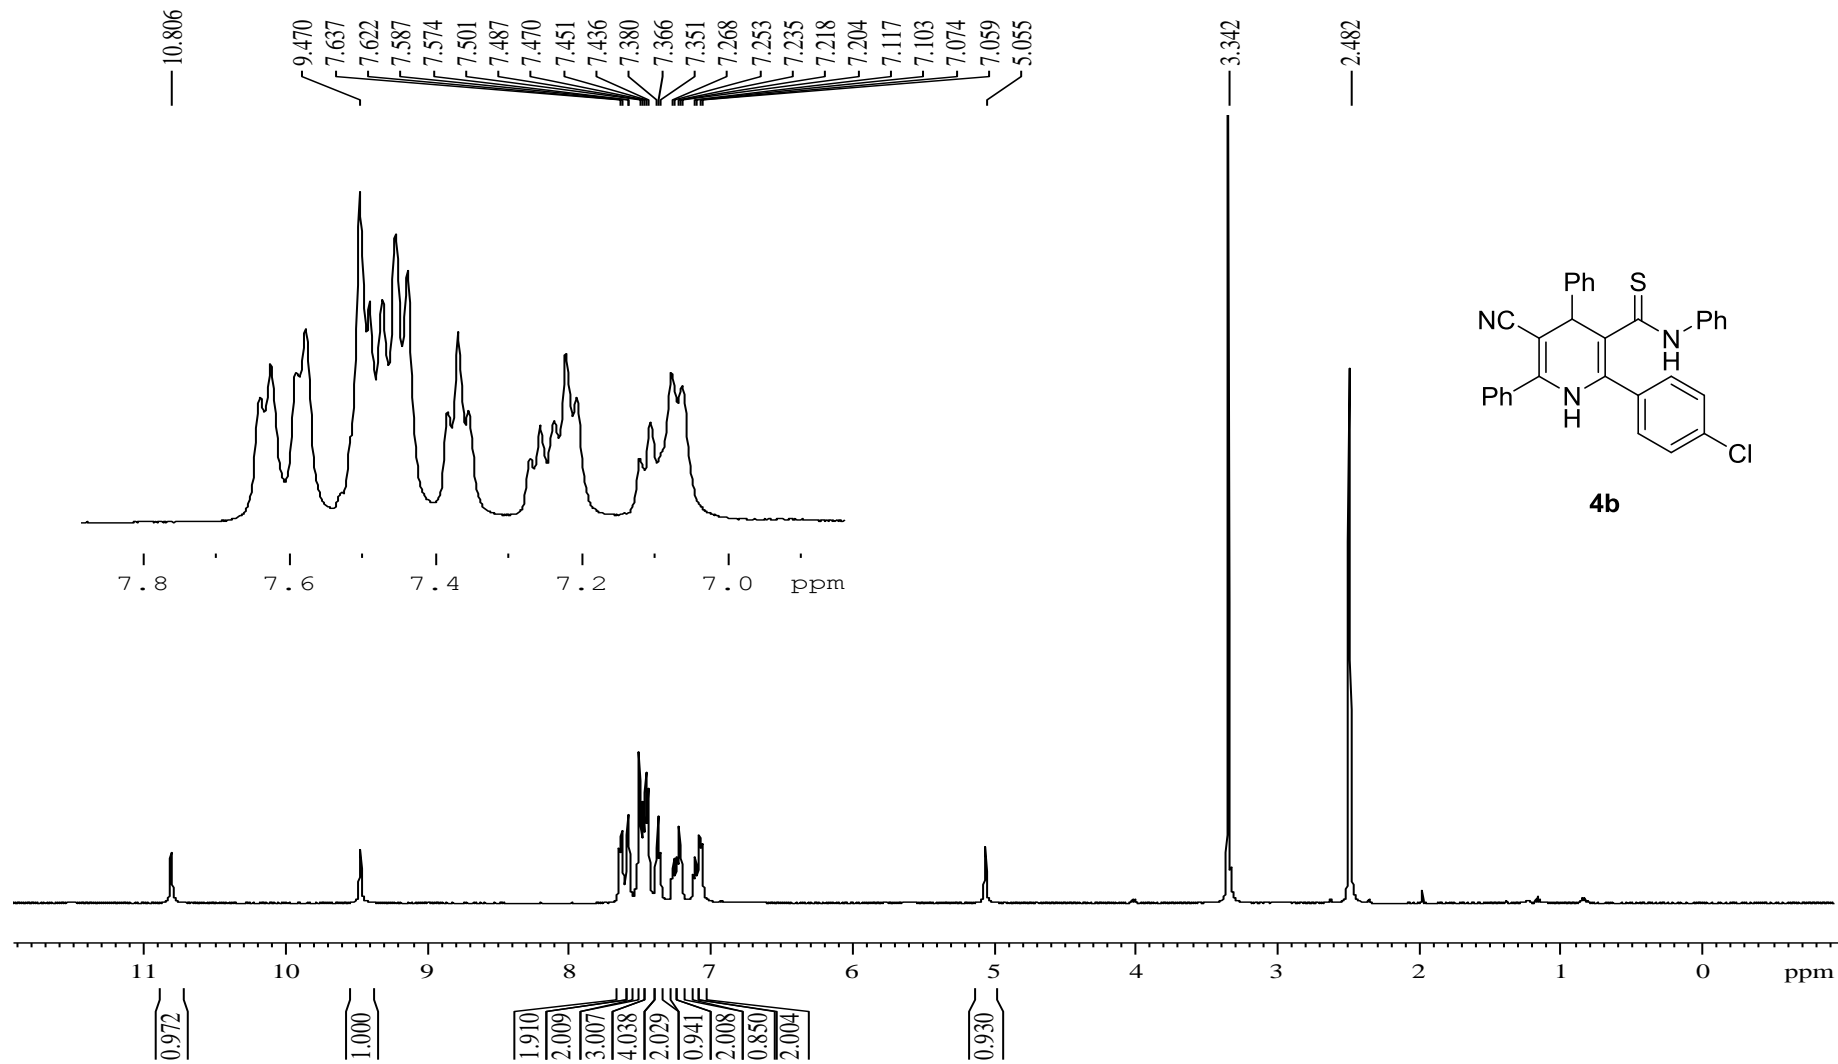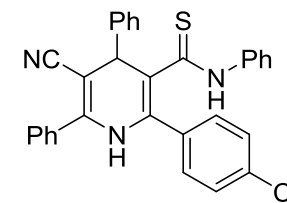

4b

—SKN-P-3 13C 1D 2015 01 14

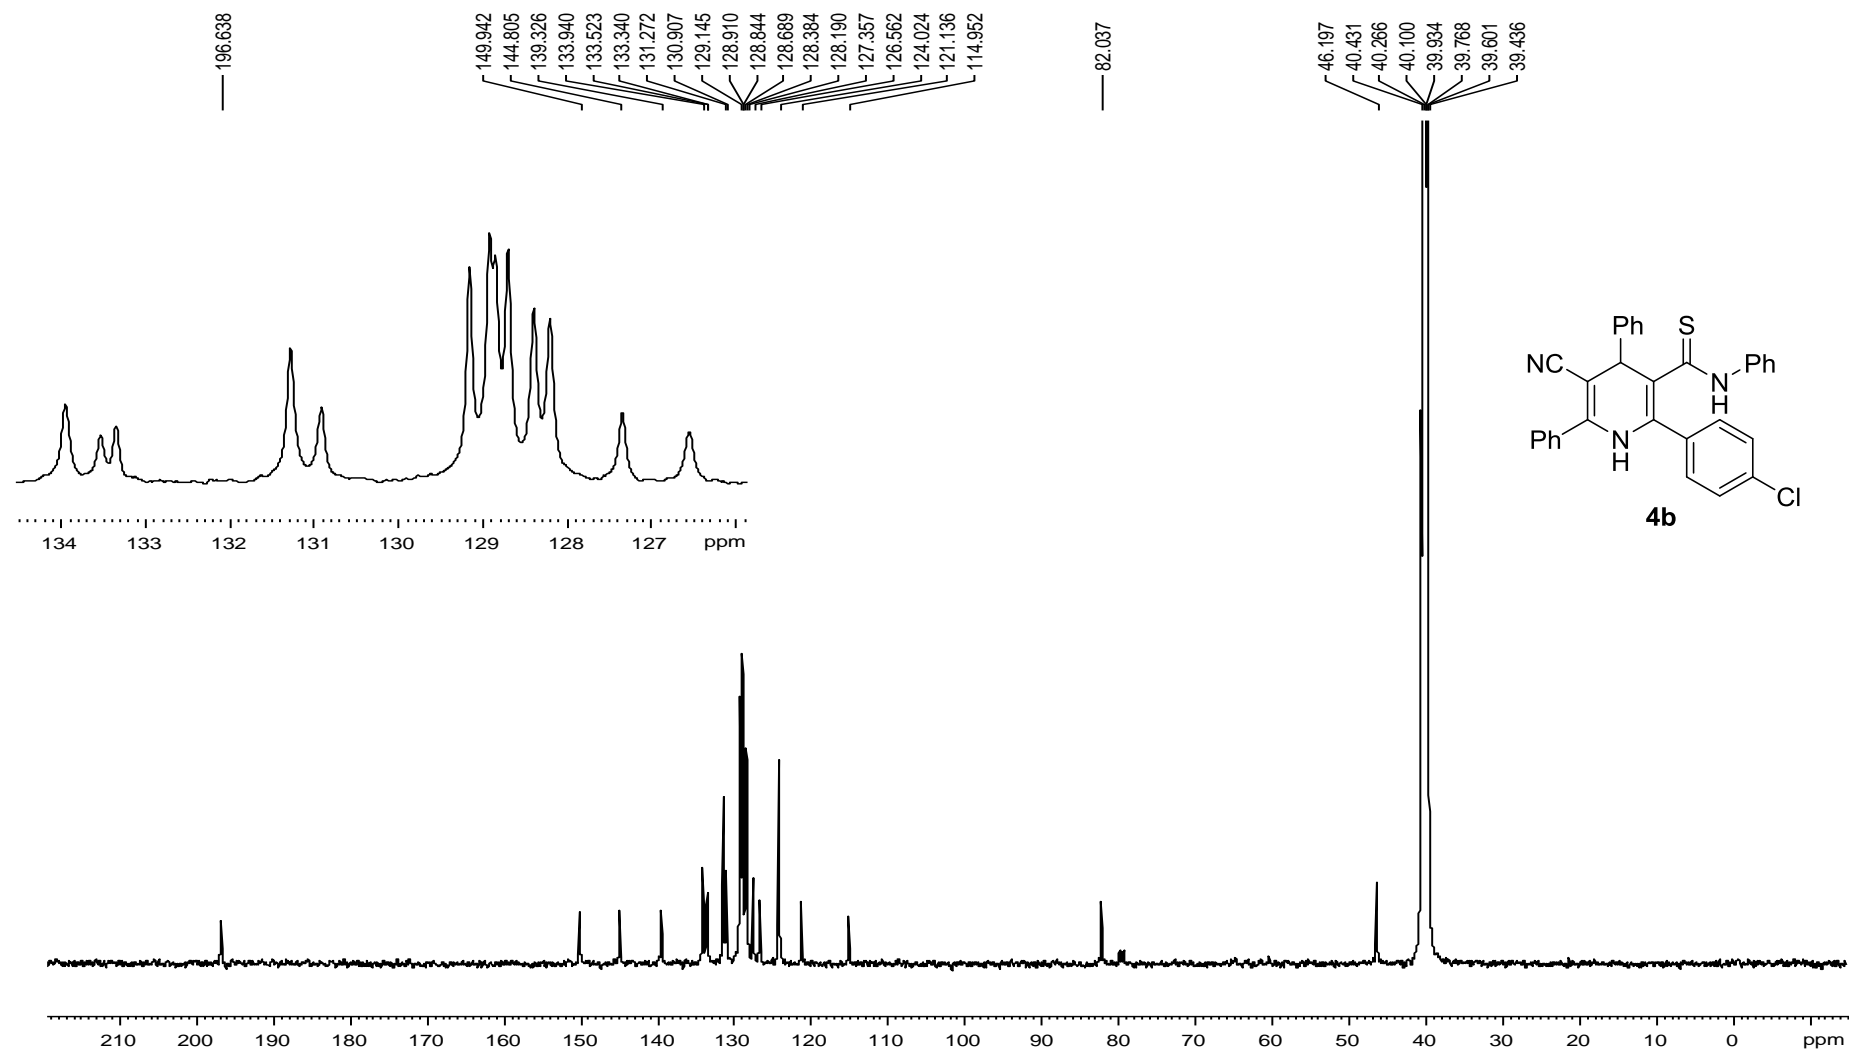

- SKN-P-10

1H 2015 04 29

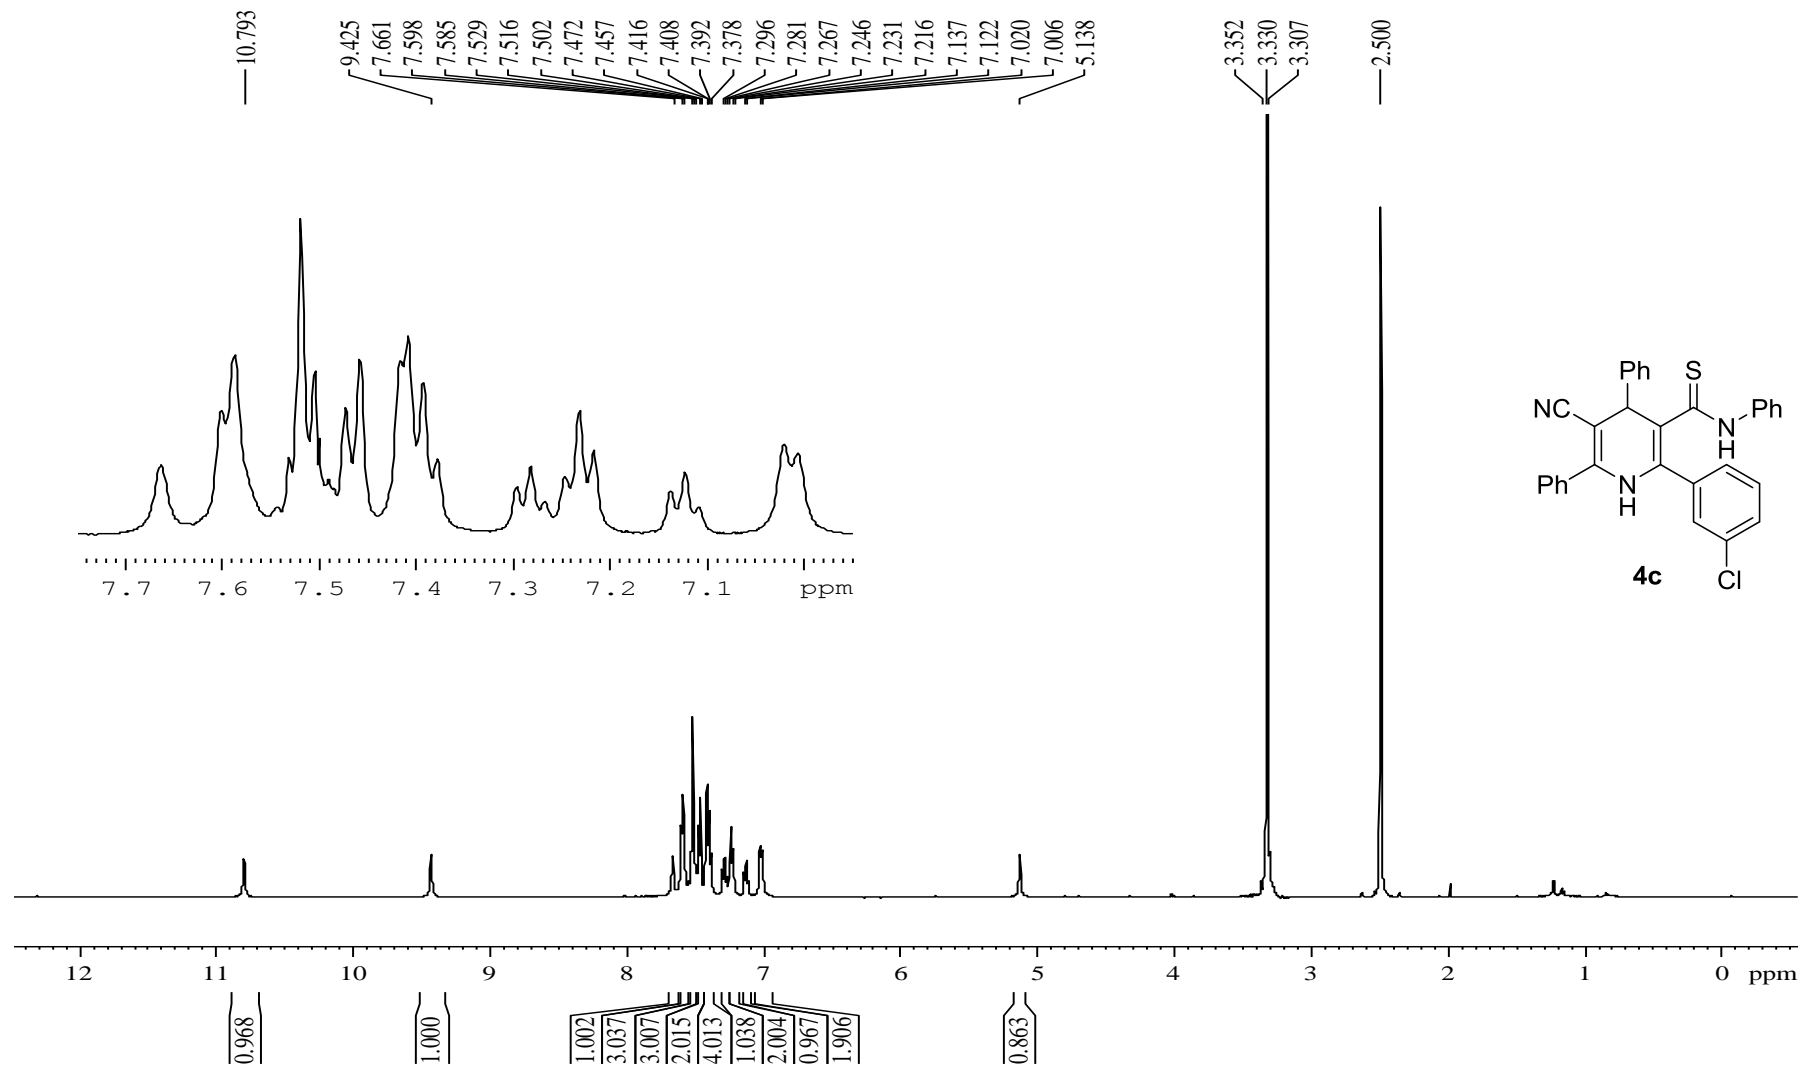



— skn-p-10 13C 2015 06 26

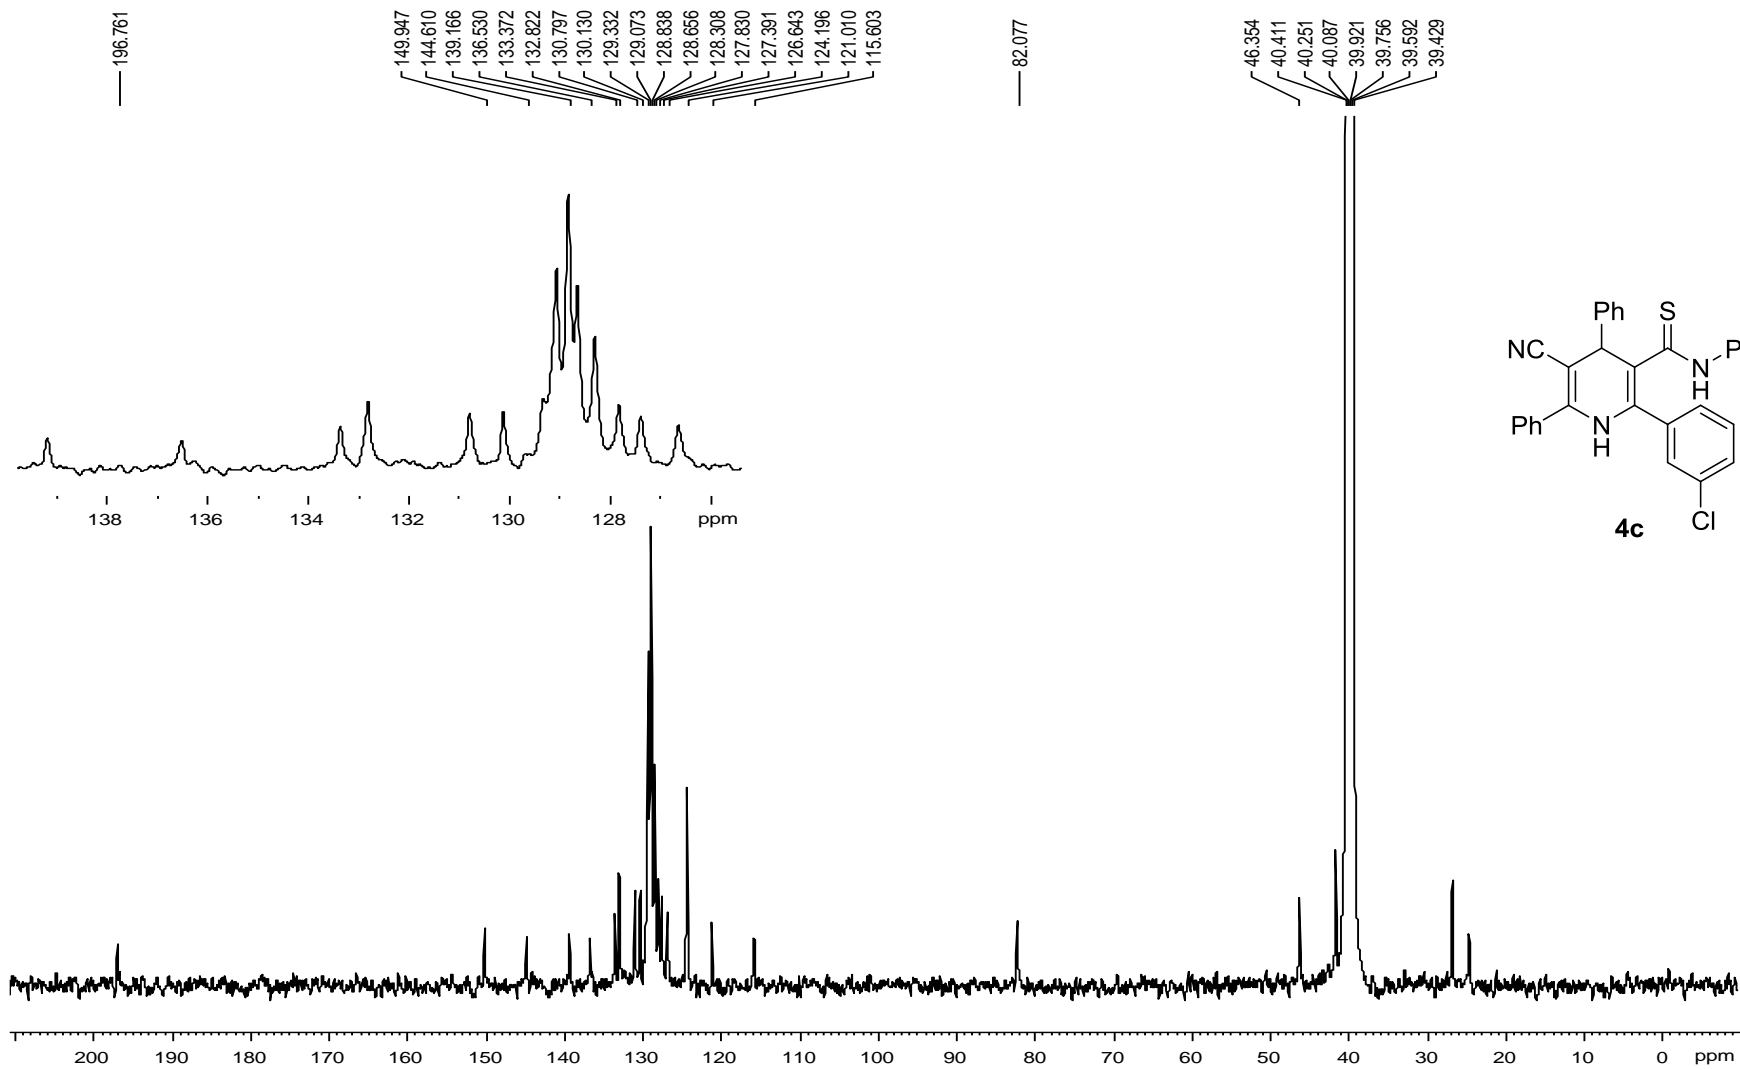

SKN-P-06

1H 2015 09 18

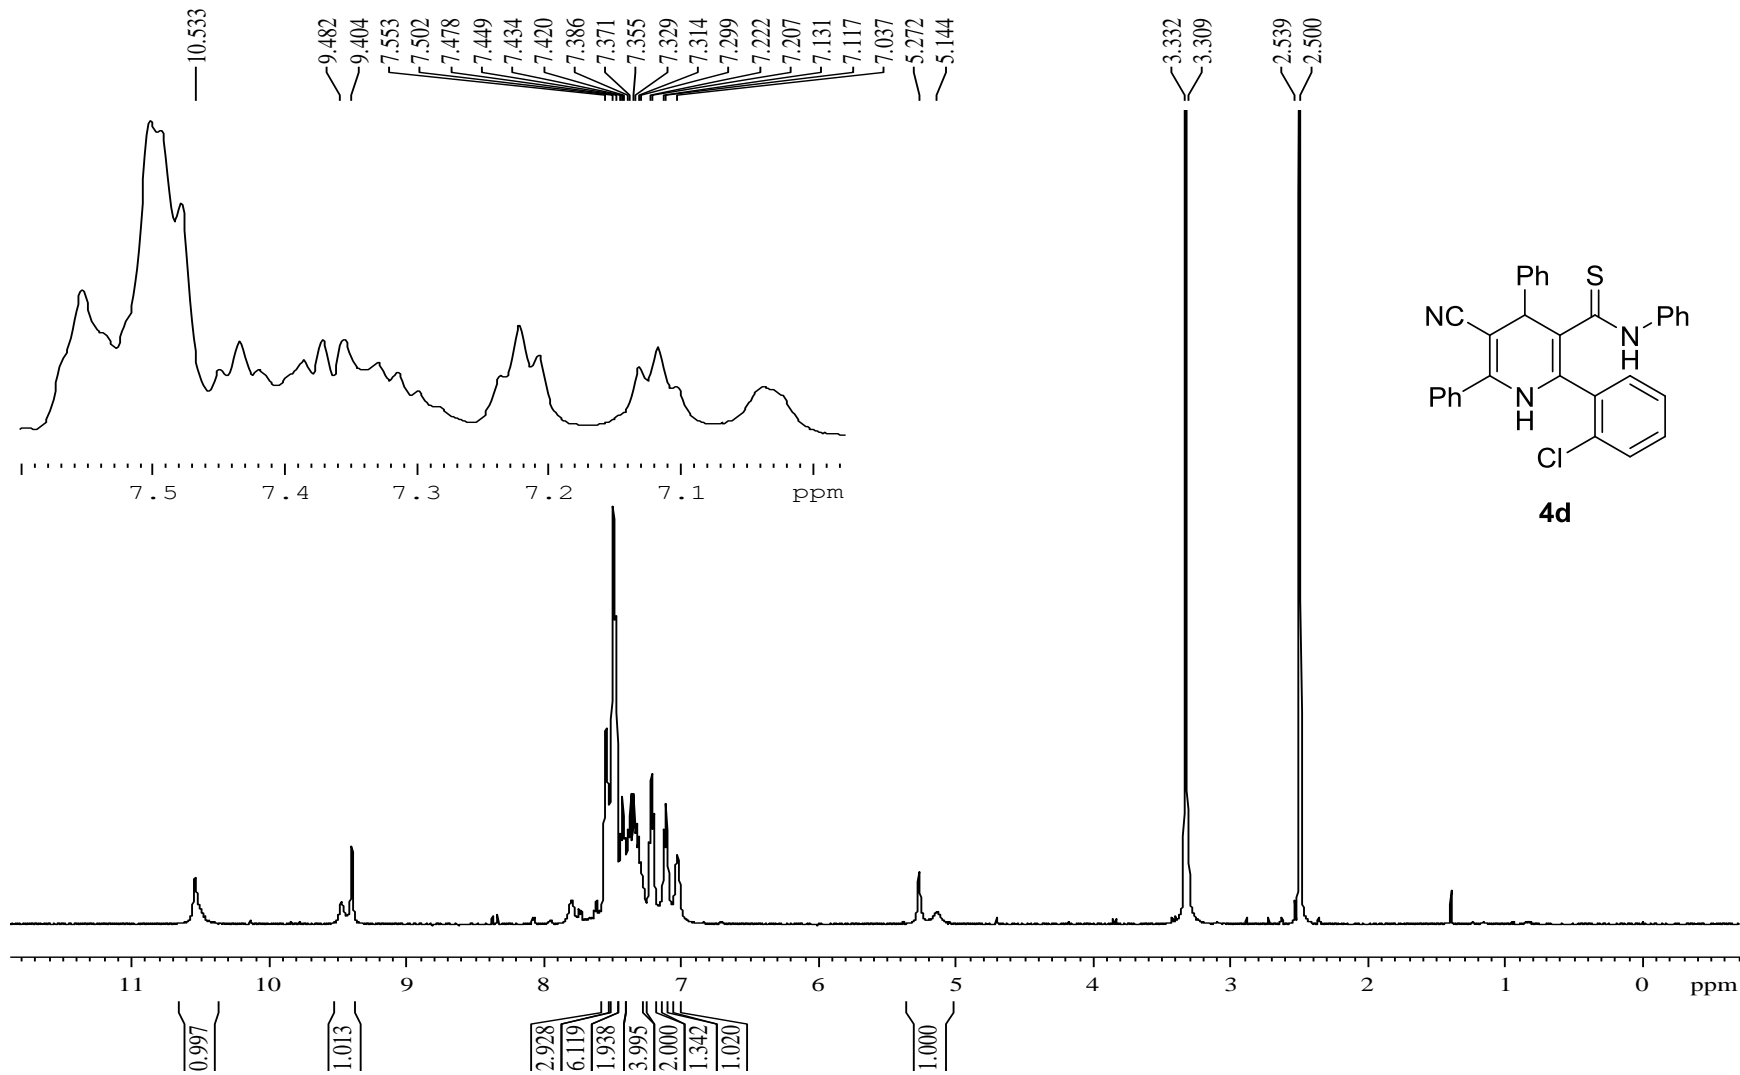

SKN-P-6B 13C 2016 01 27

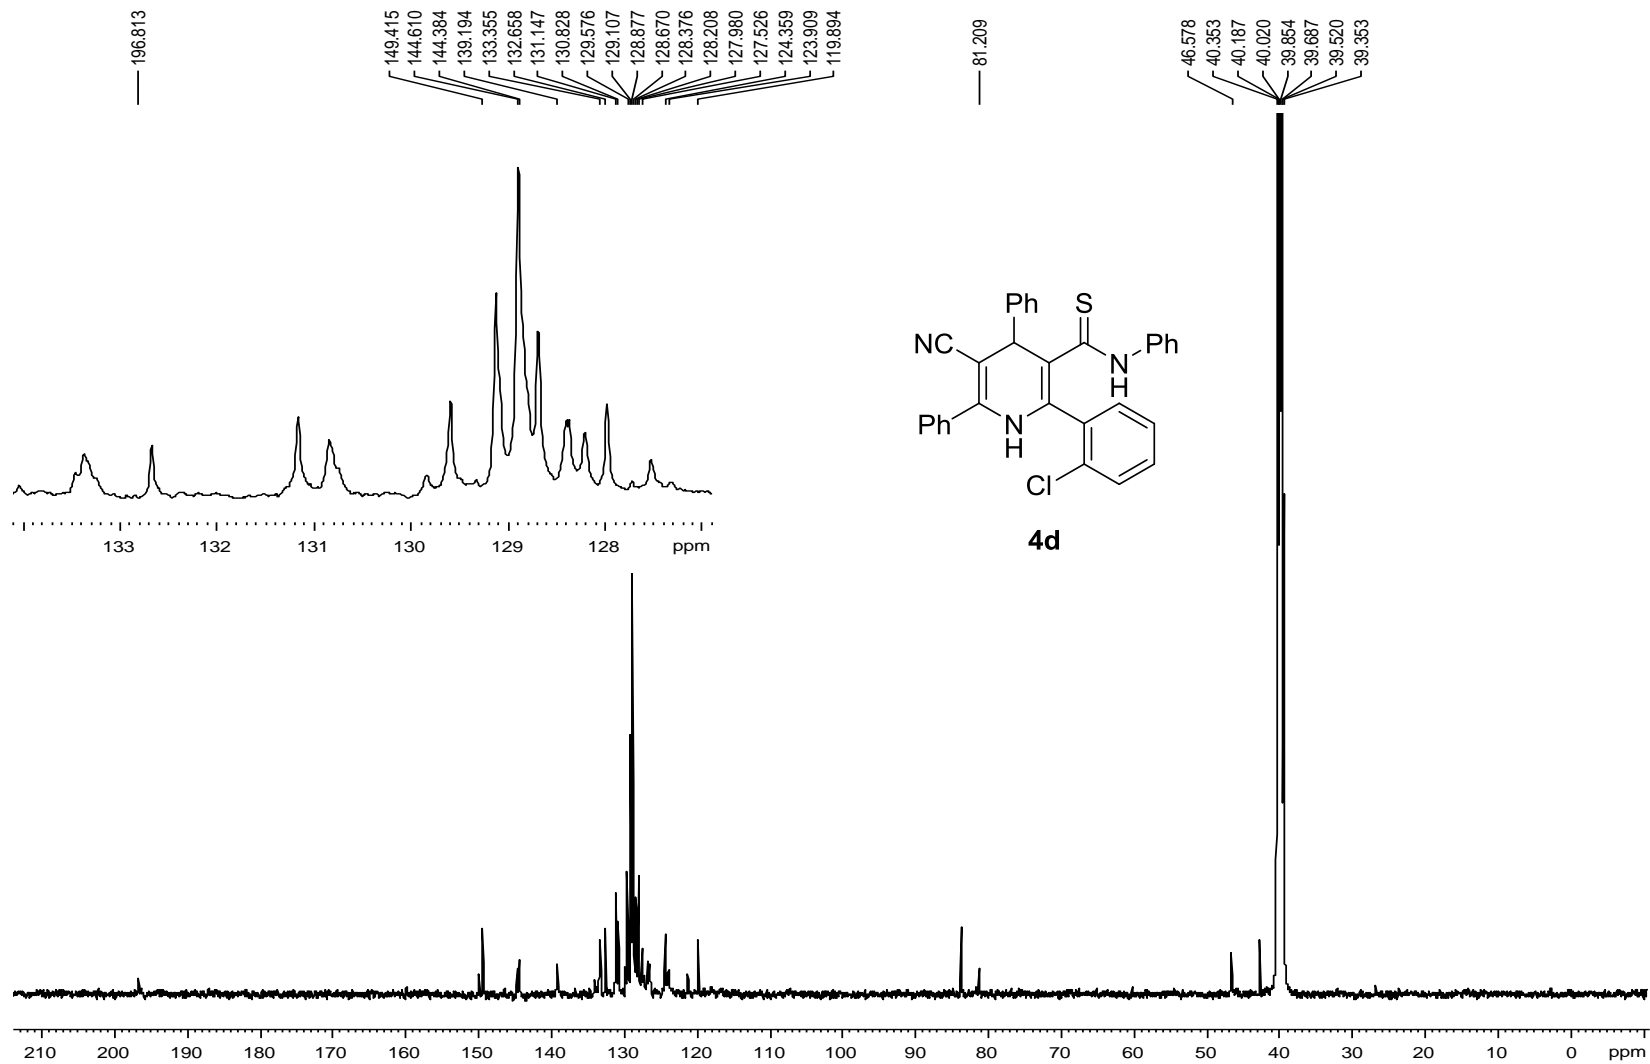

skn-p-02 1H 2015 05 26

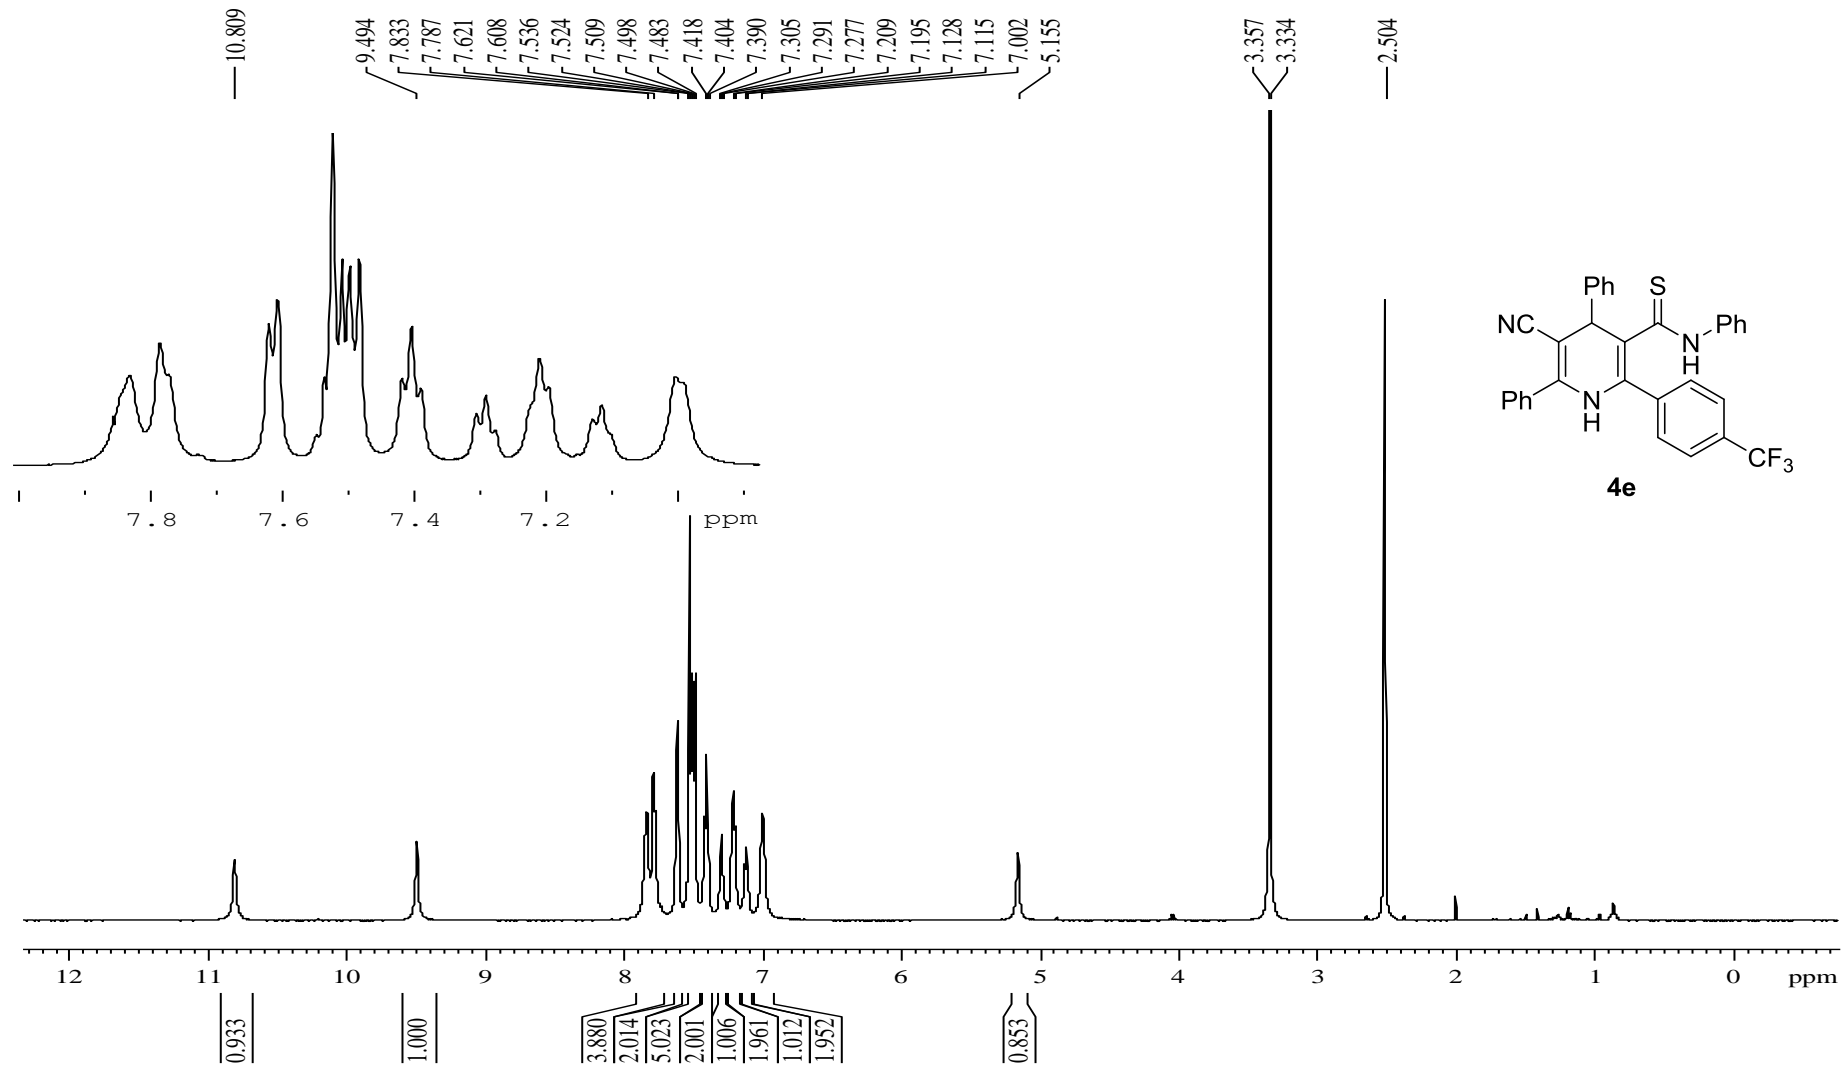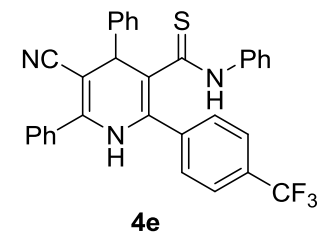

— SKN-P-02 13C 2015 05 26

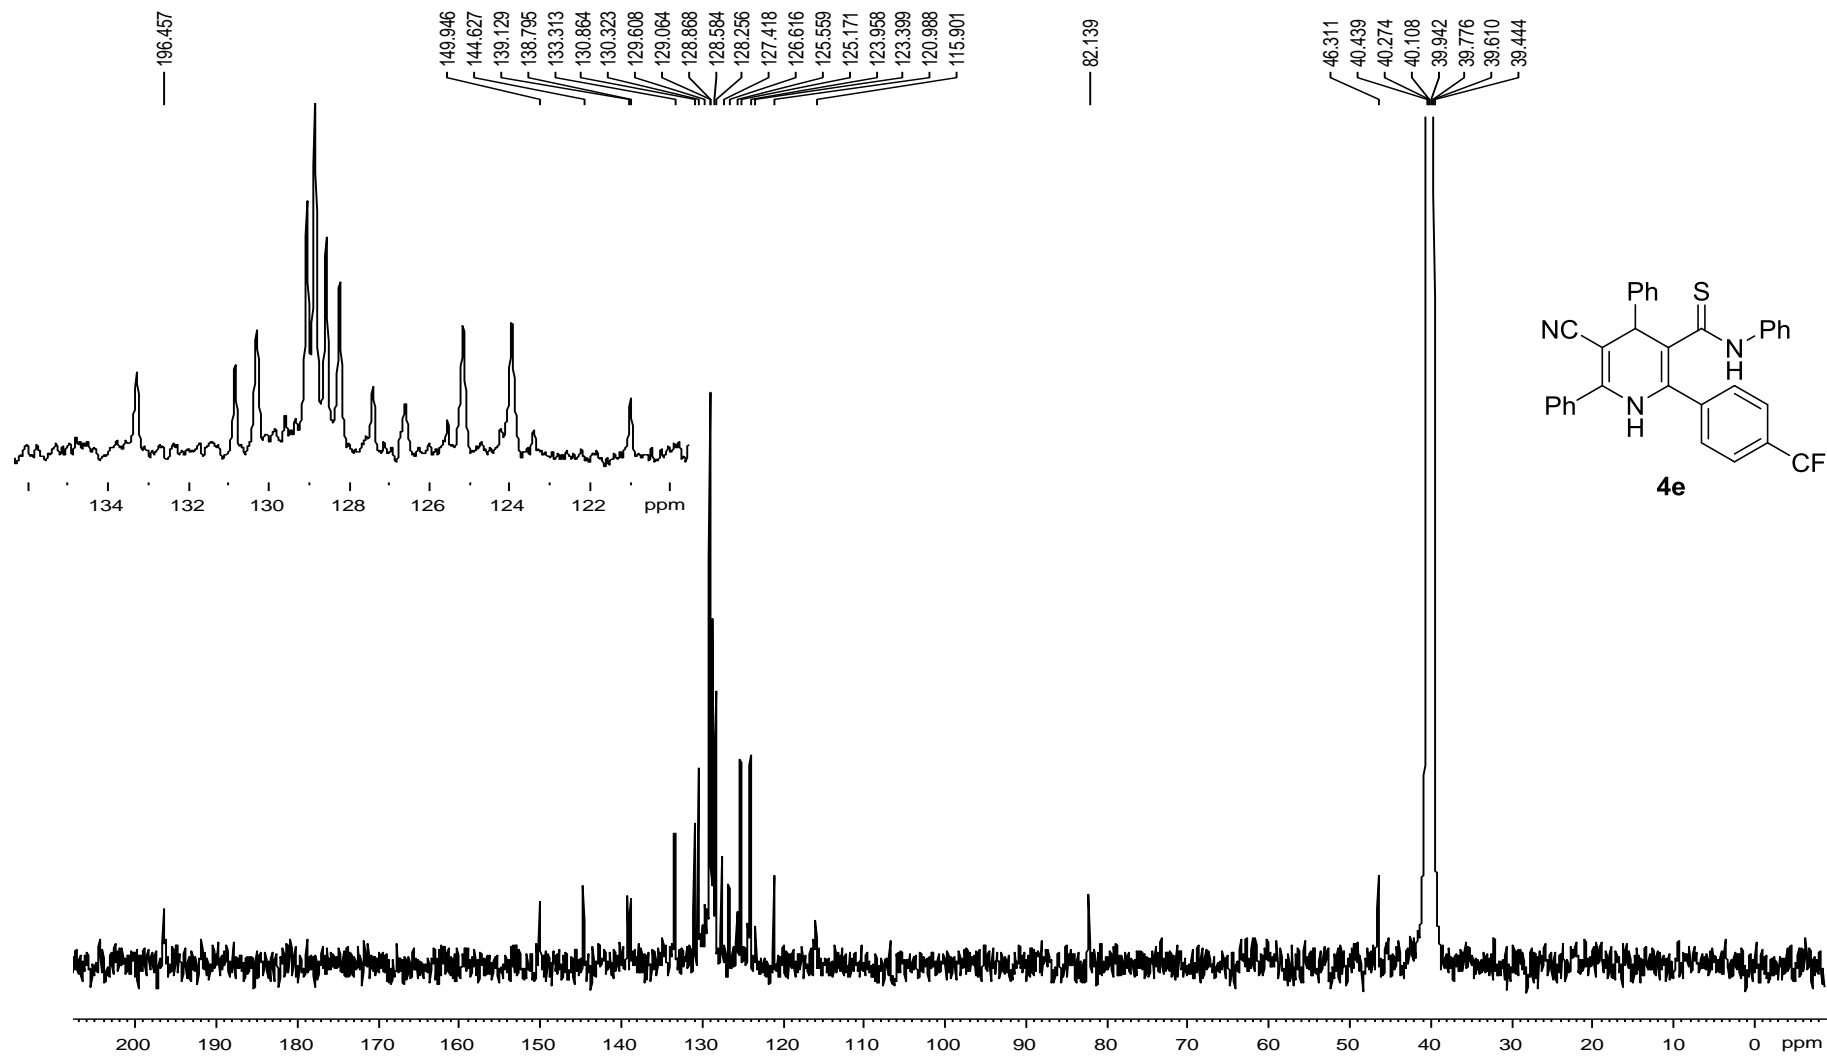

SKN-P-5

1H 1D 2014 12 30

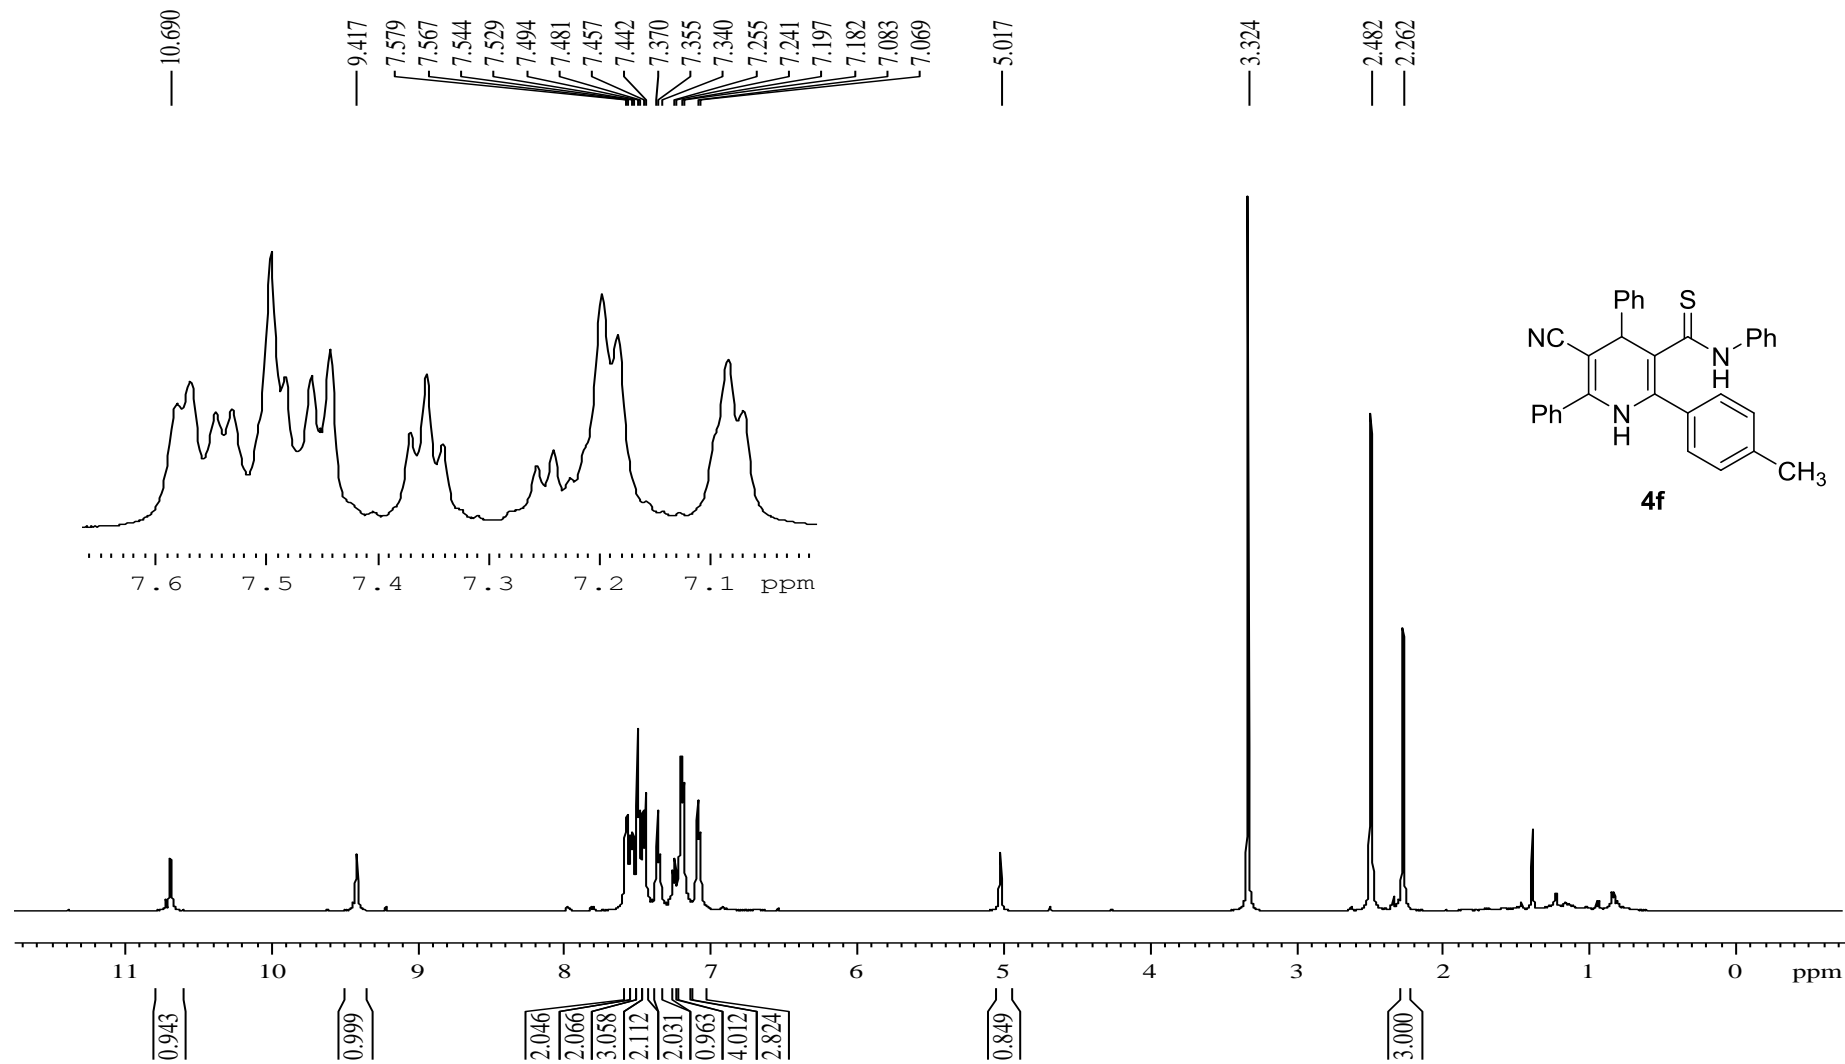

— SKN-P-05 13C 1D 2014 12 30

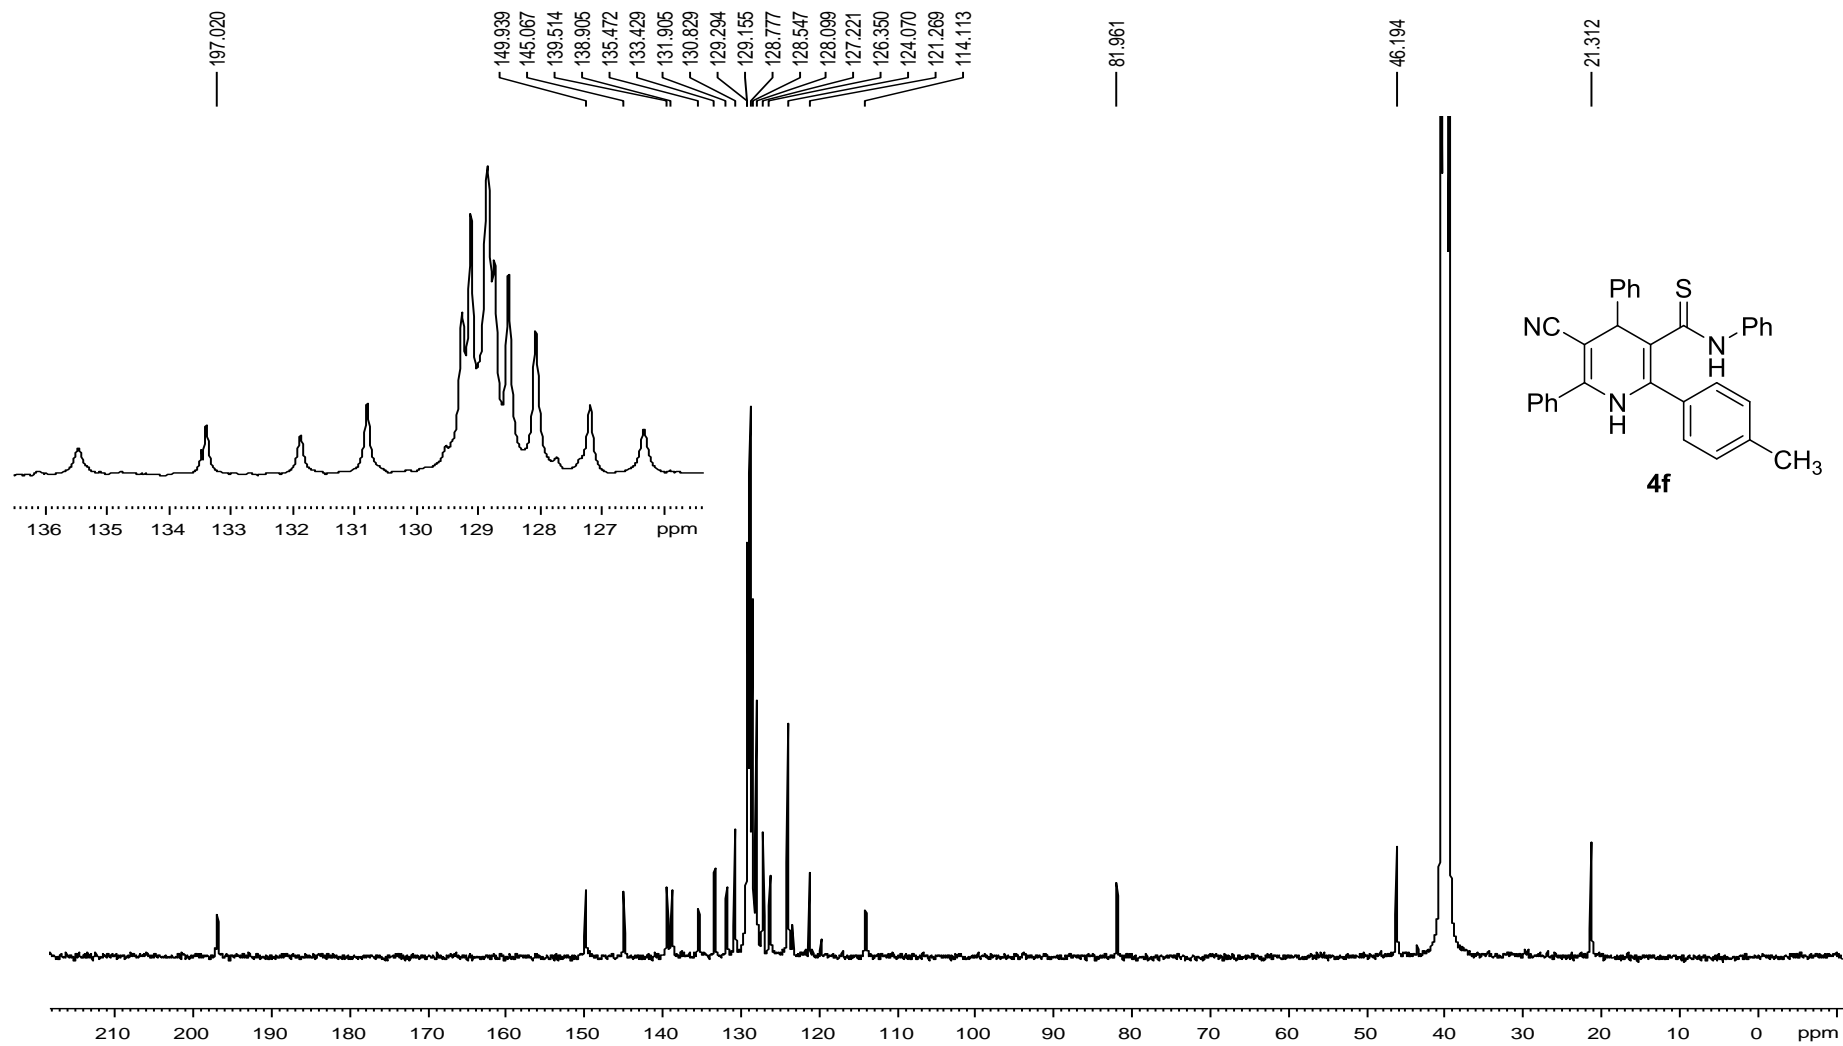

SKN-P-7

1H 2015 04 30

10.683

9.469  
7.646  
7.632  
7.599  
7.585  
7.509  
7.495  
7.477  
7.462  
7.415  
7.396  
7.380  
7.365  
7.280  
7.266  
7.251  
7.070  
7.053  
7.035  
7.022  
5.071

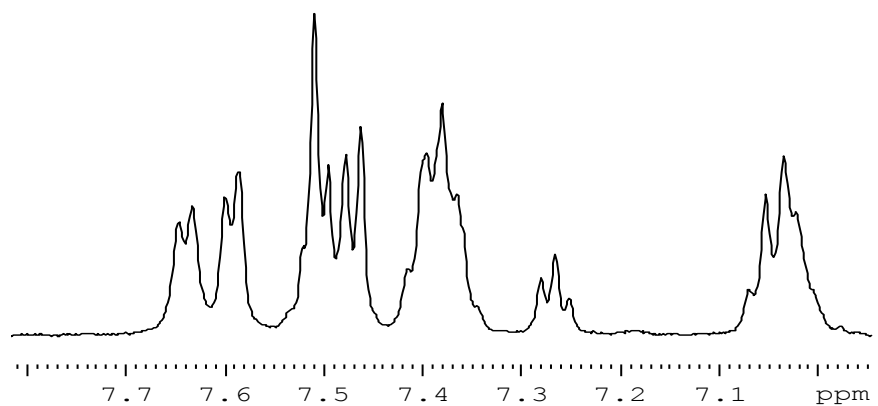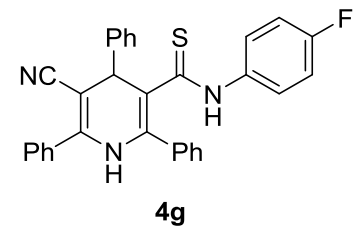

3.321

2.500

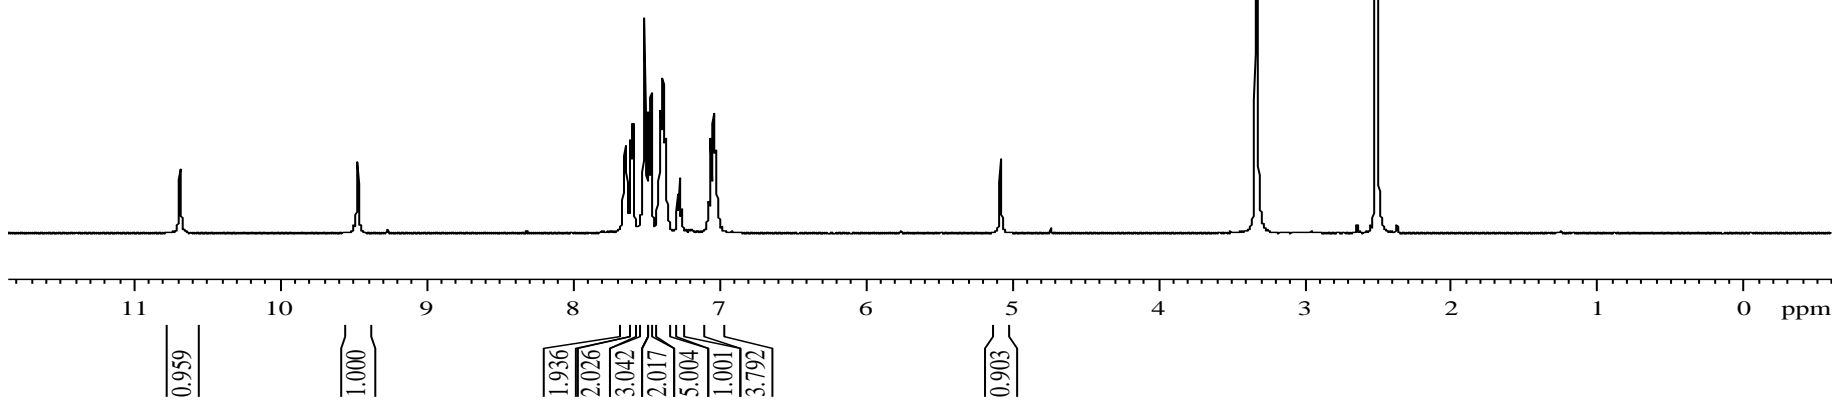



SKN-P-7 13C 2015 04 30

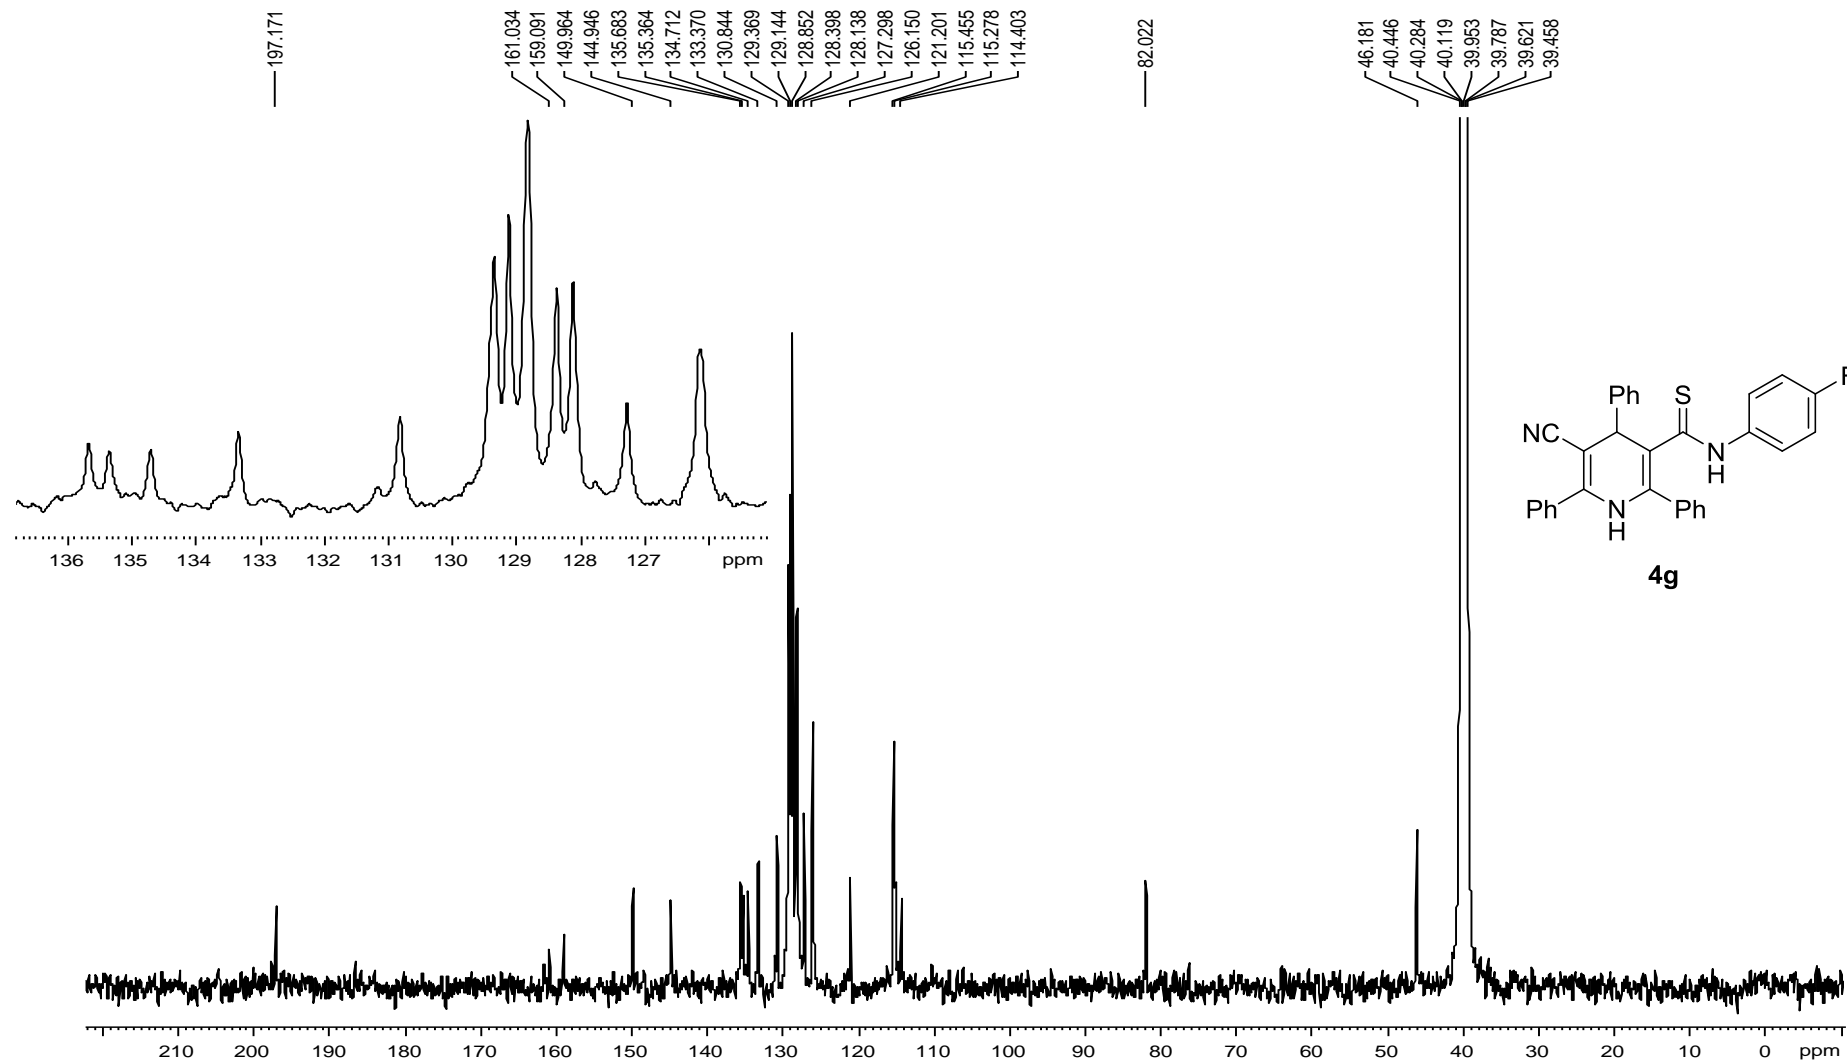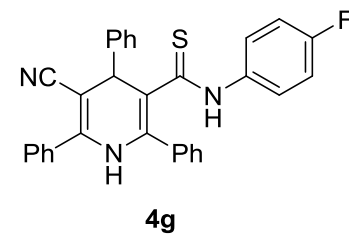

SKN-P-04

1H 1D 2014 12 23

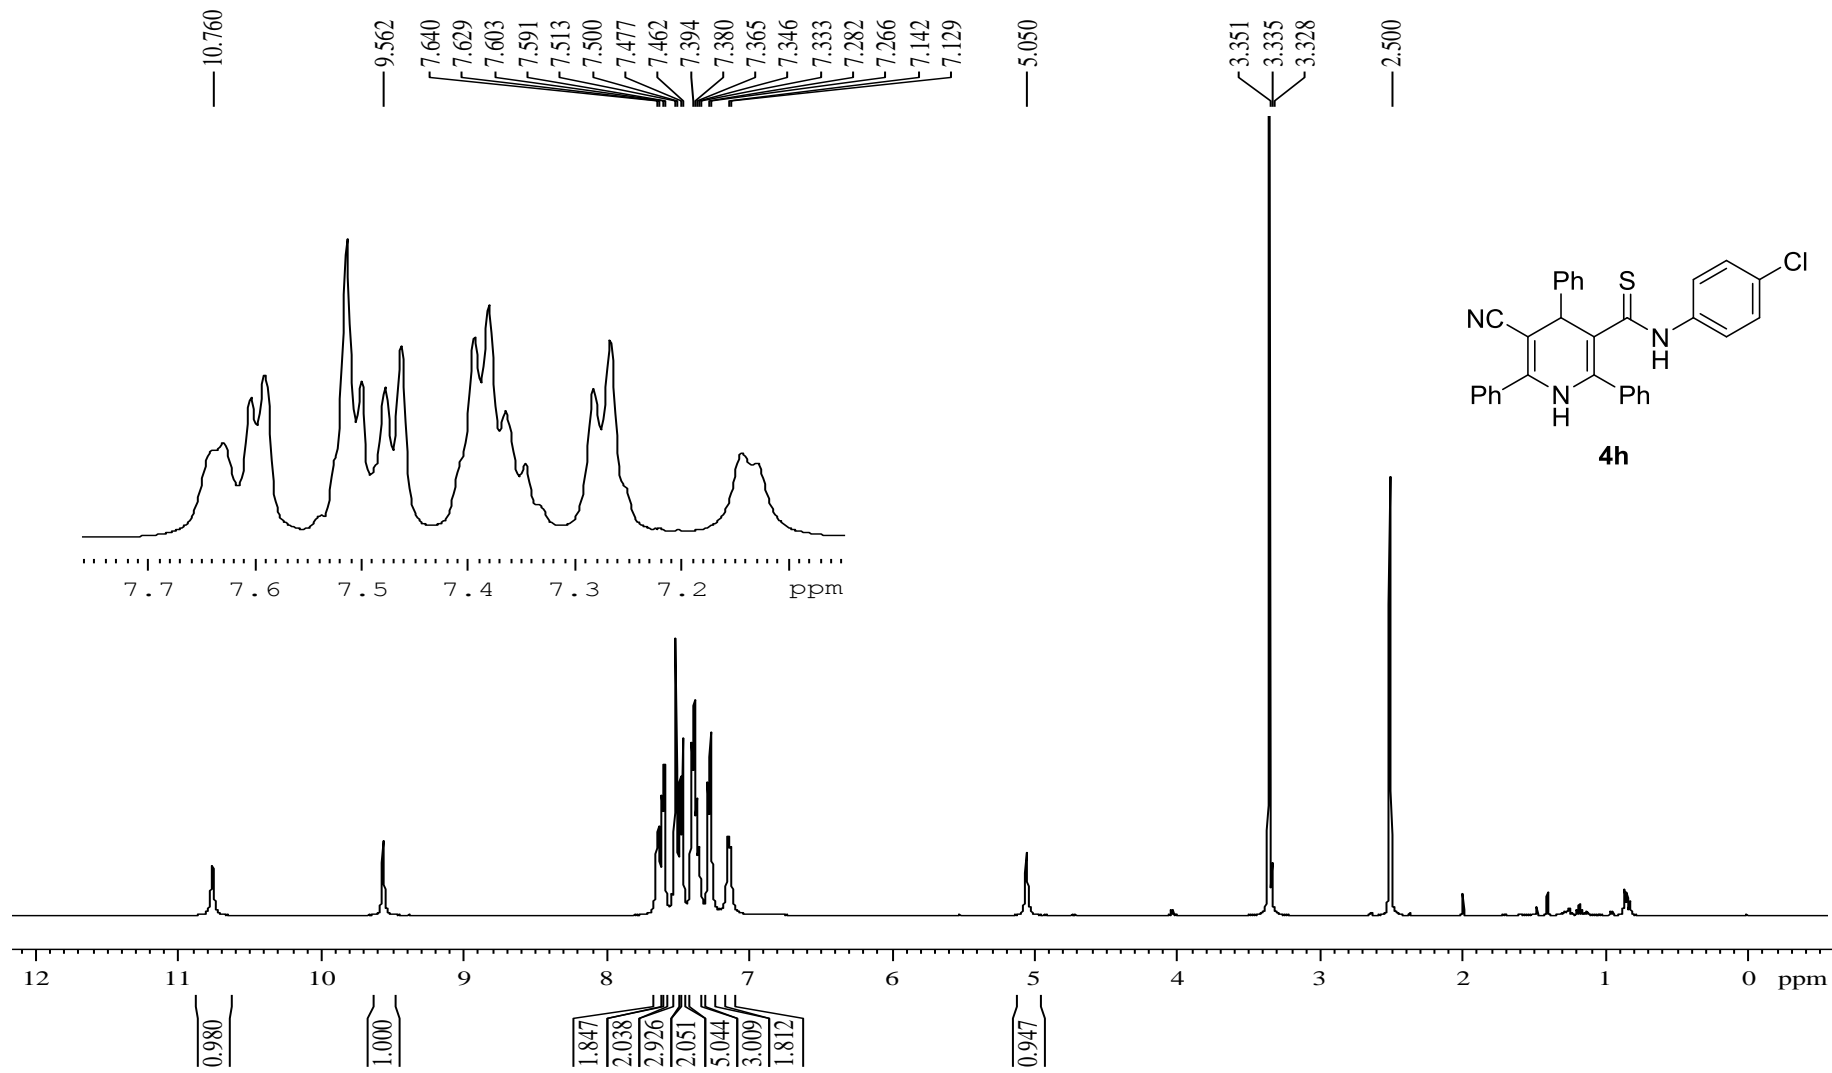

KN-P-04-1 13C 1D 2014 12 2

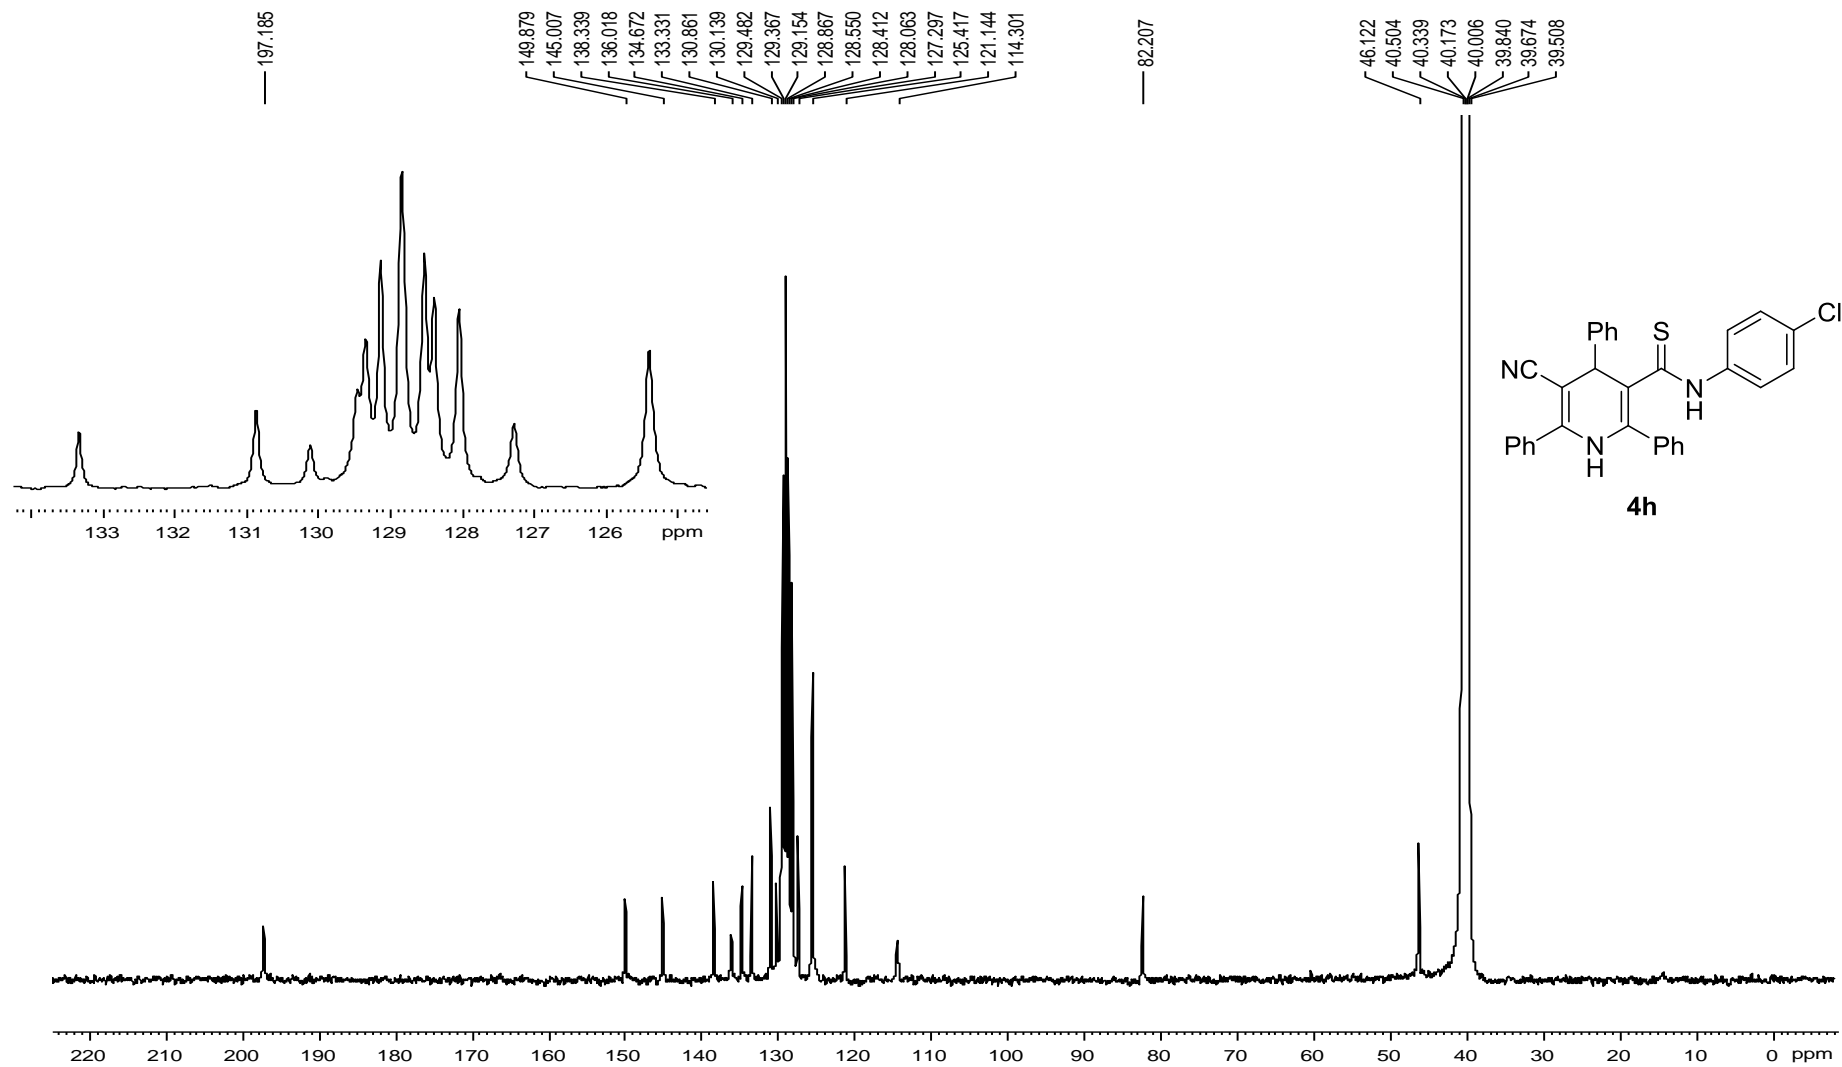

skn-p-21a 2015 06 10

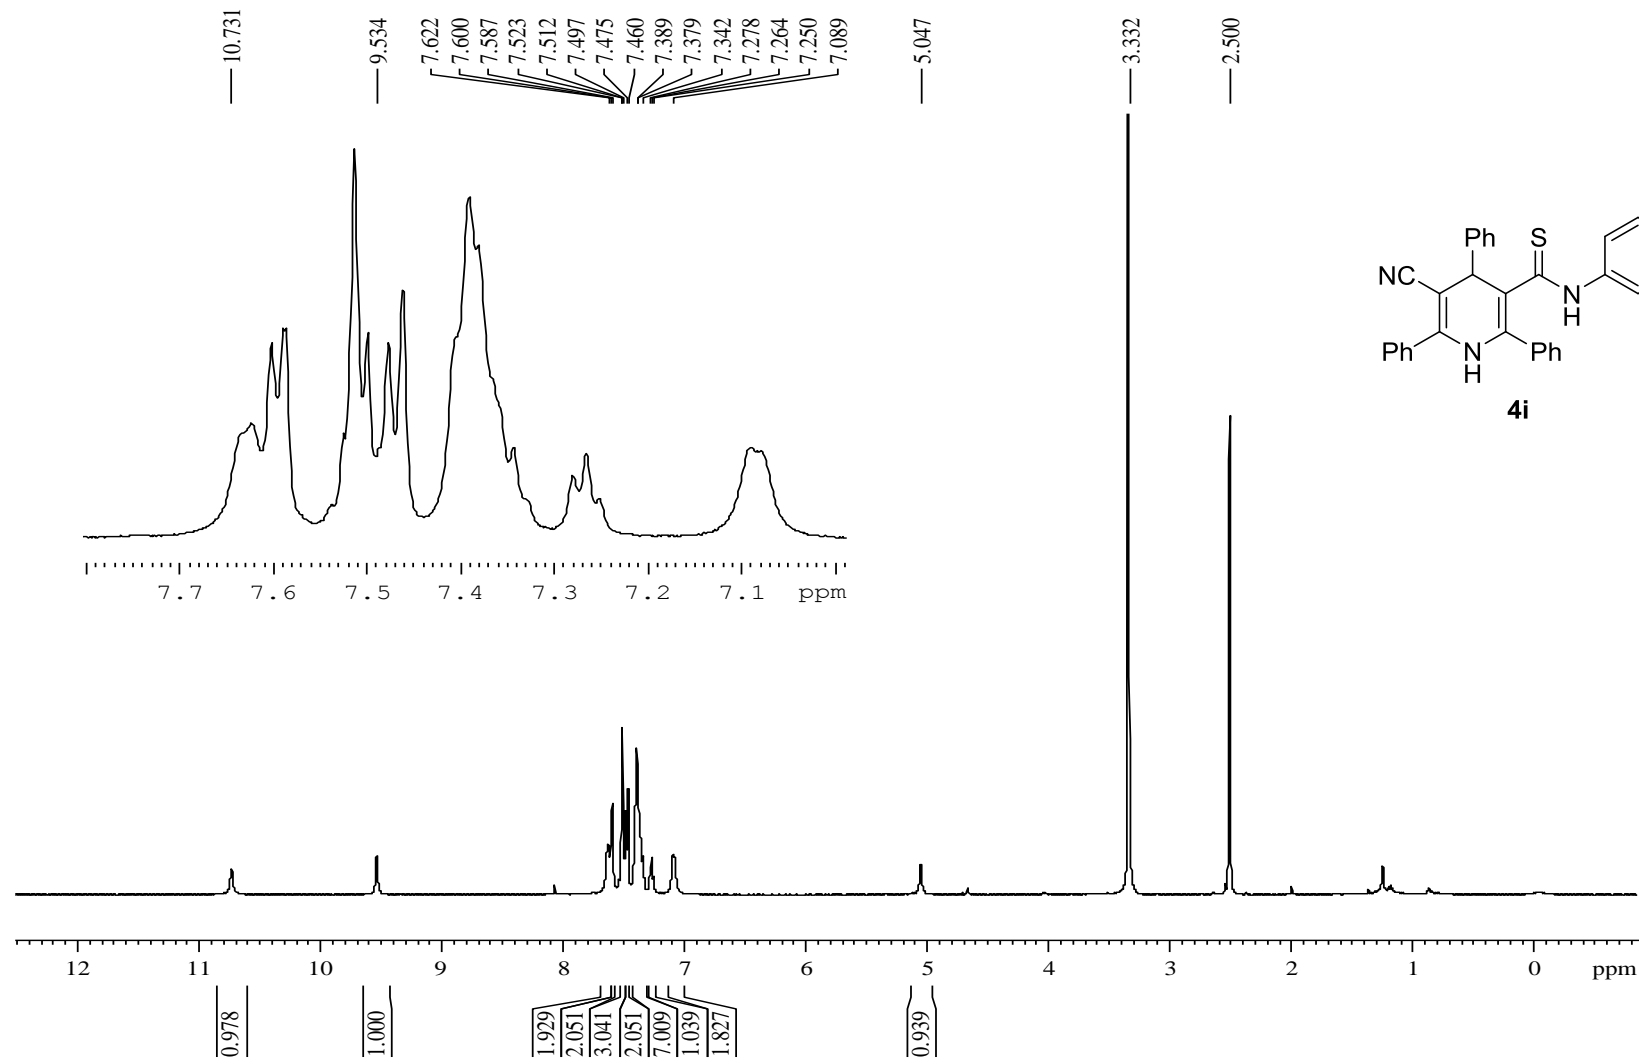

skn-p-21a 13C 2015 06 10

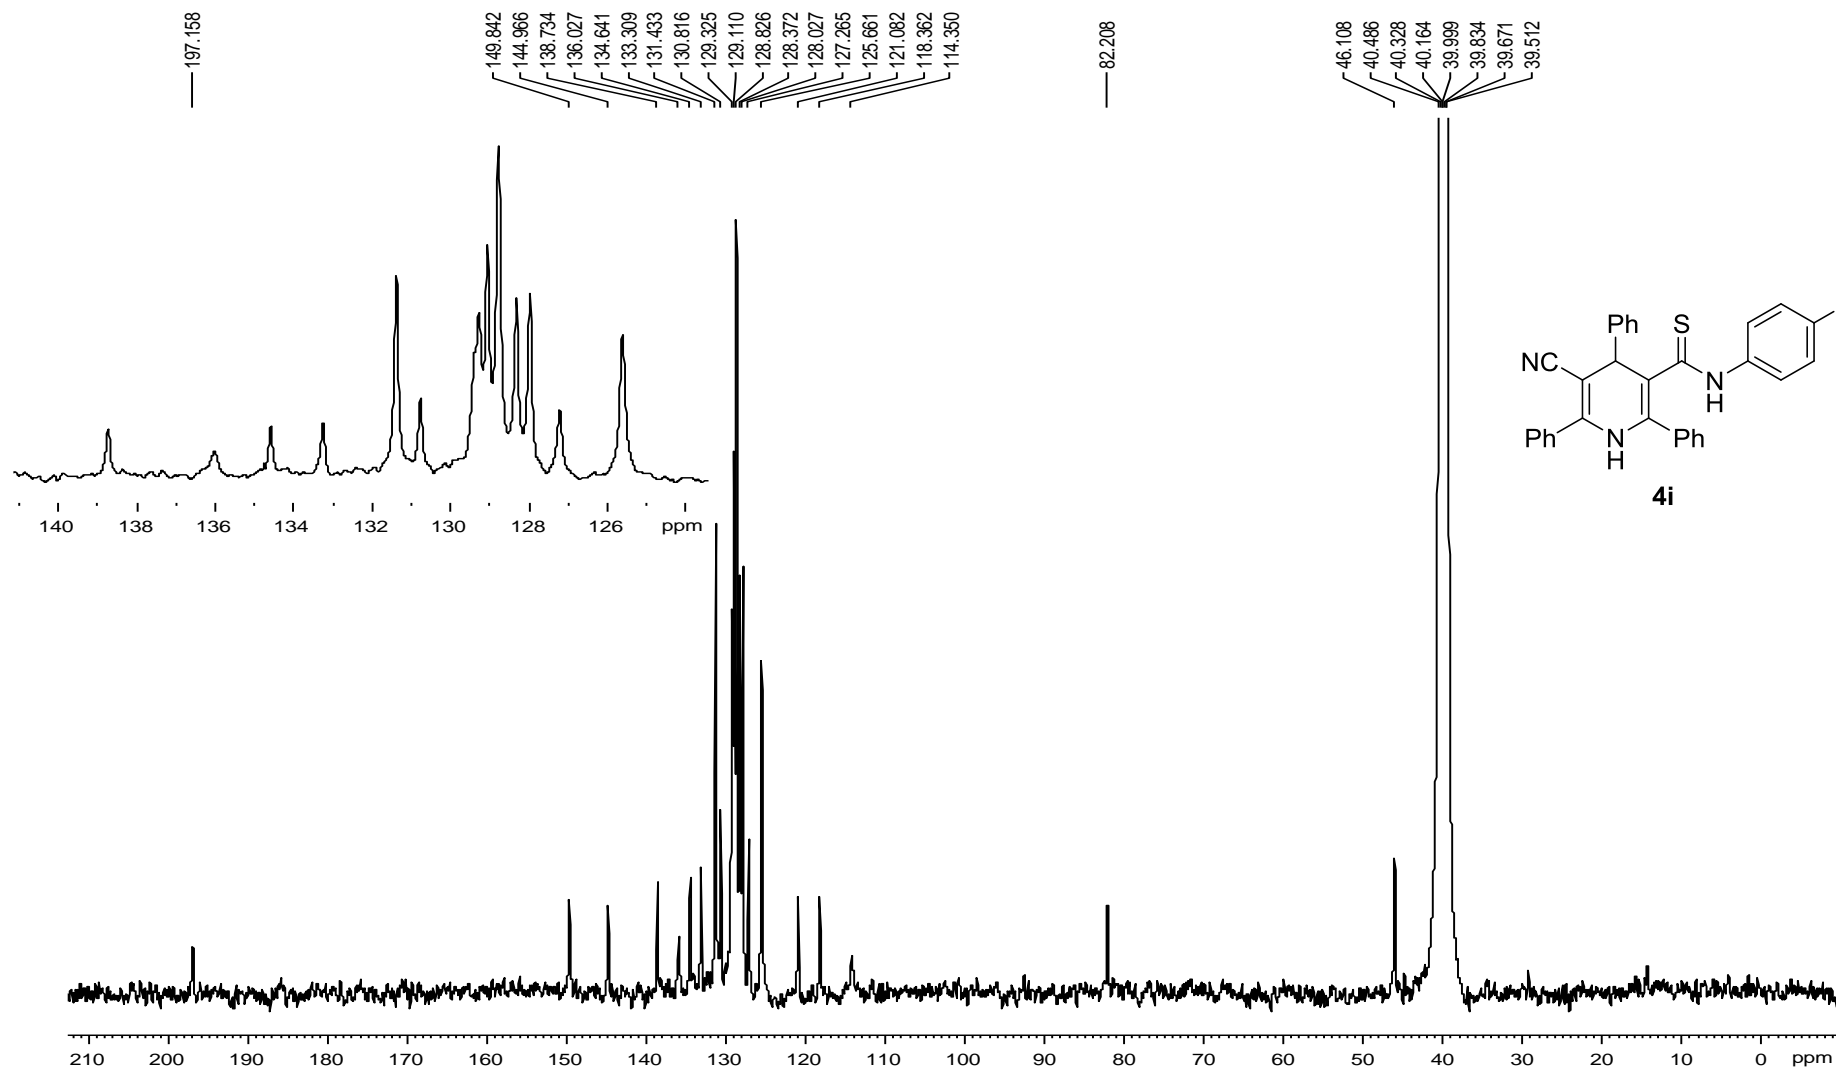

SKN-P-8

1H 2015 06 25

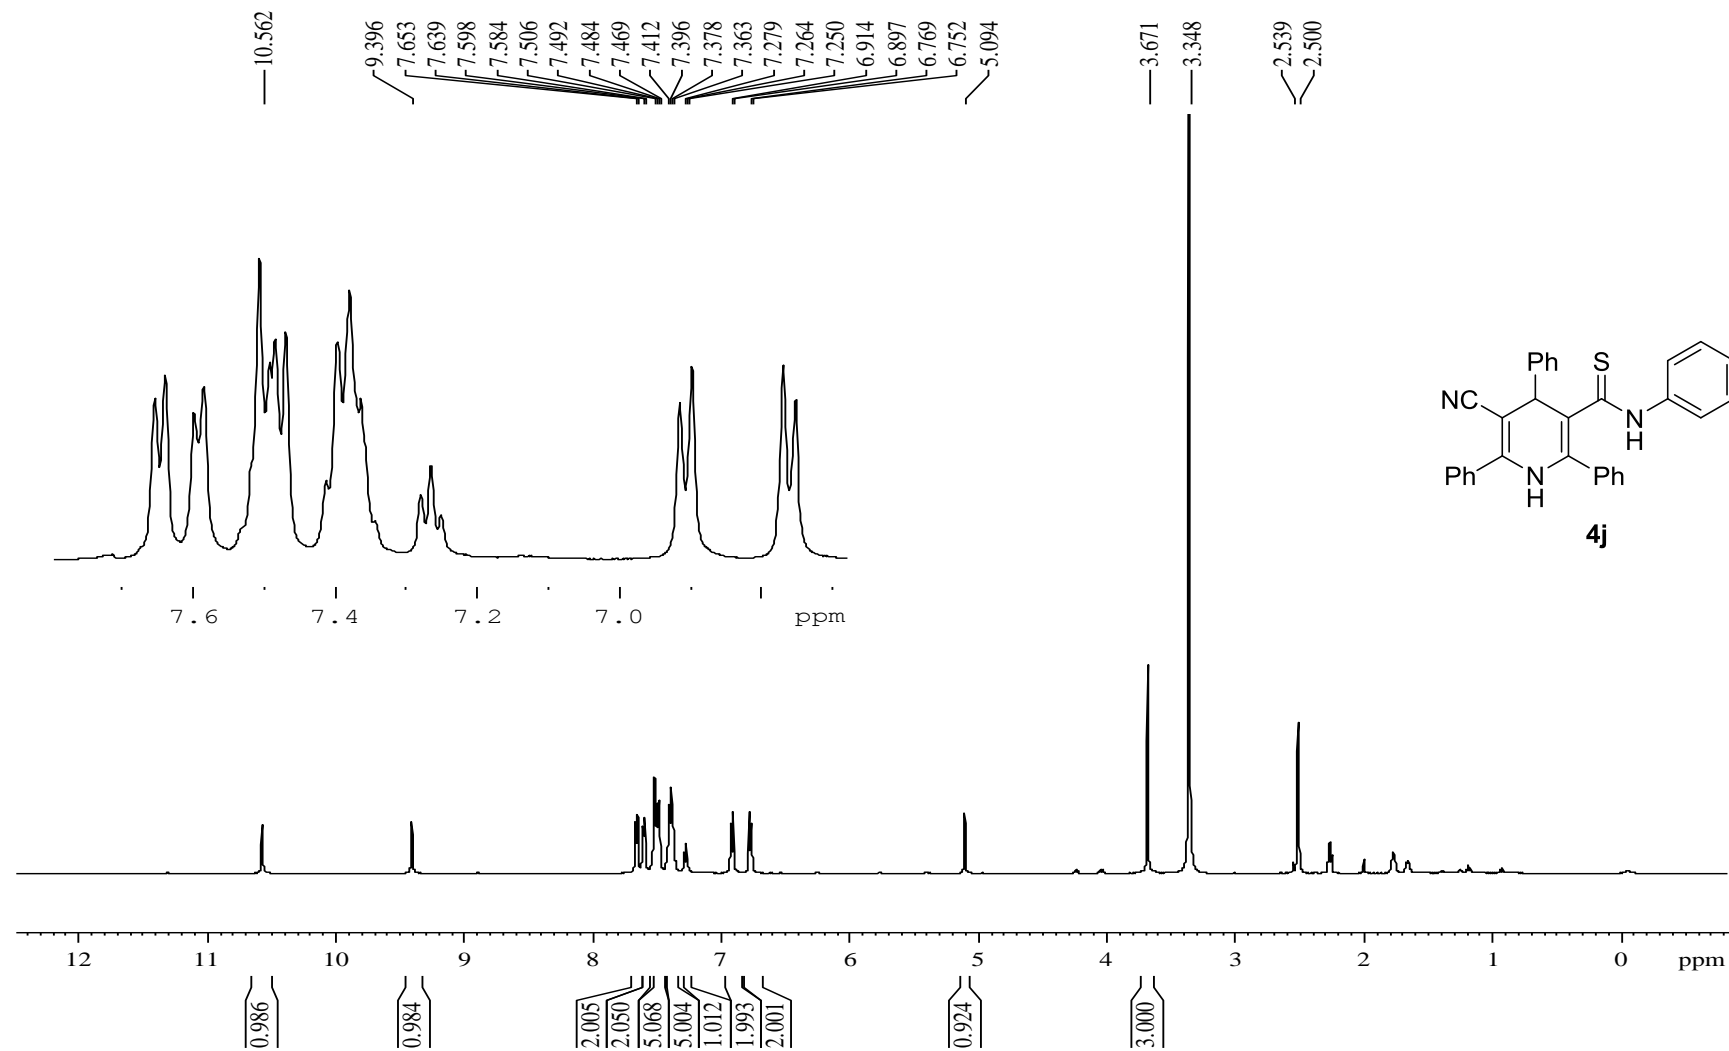

\_skn-p-8 13C 2015 06 26

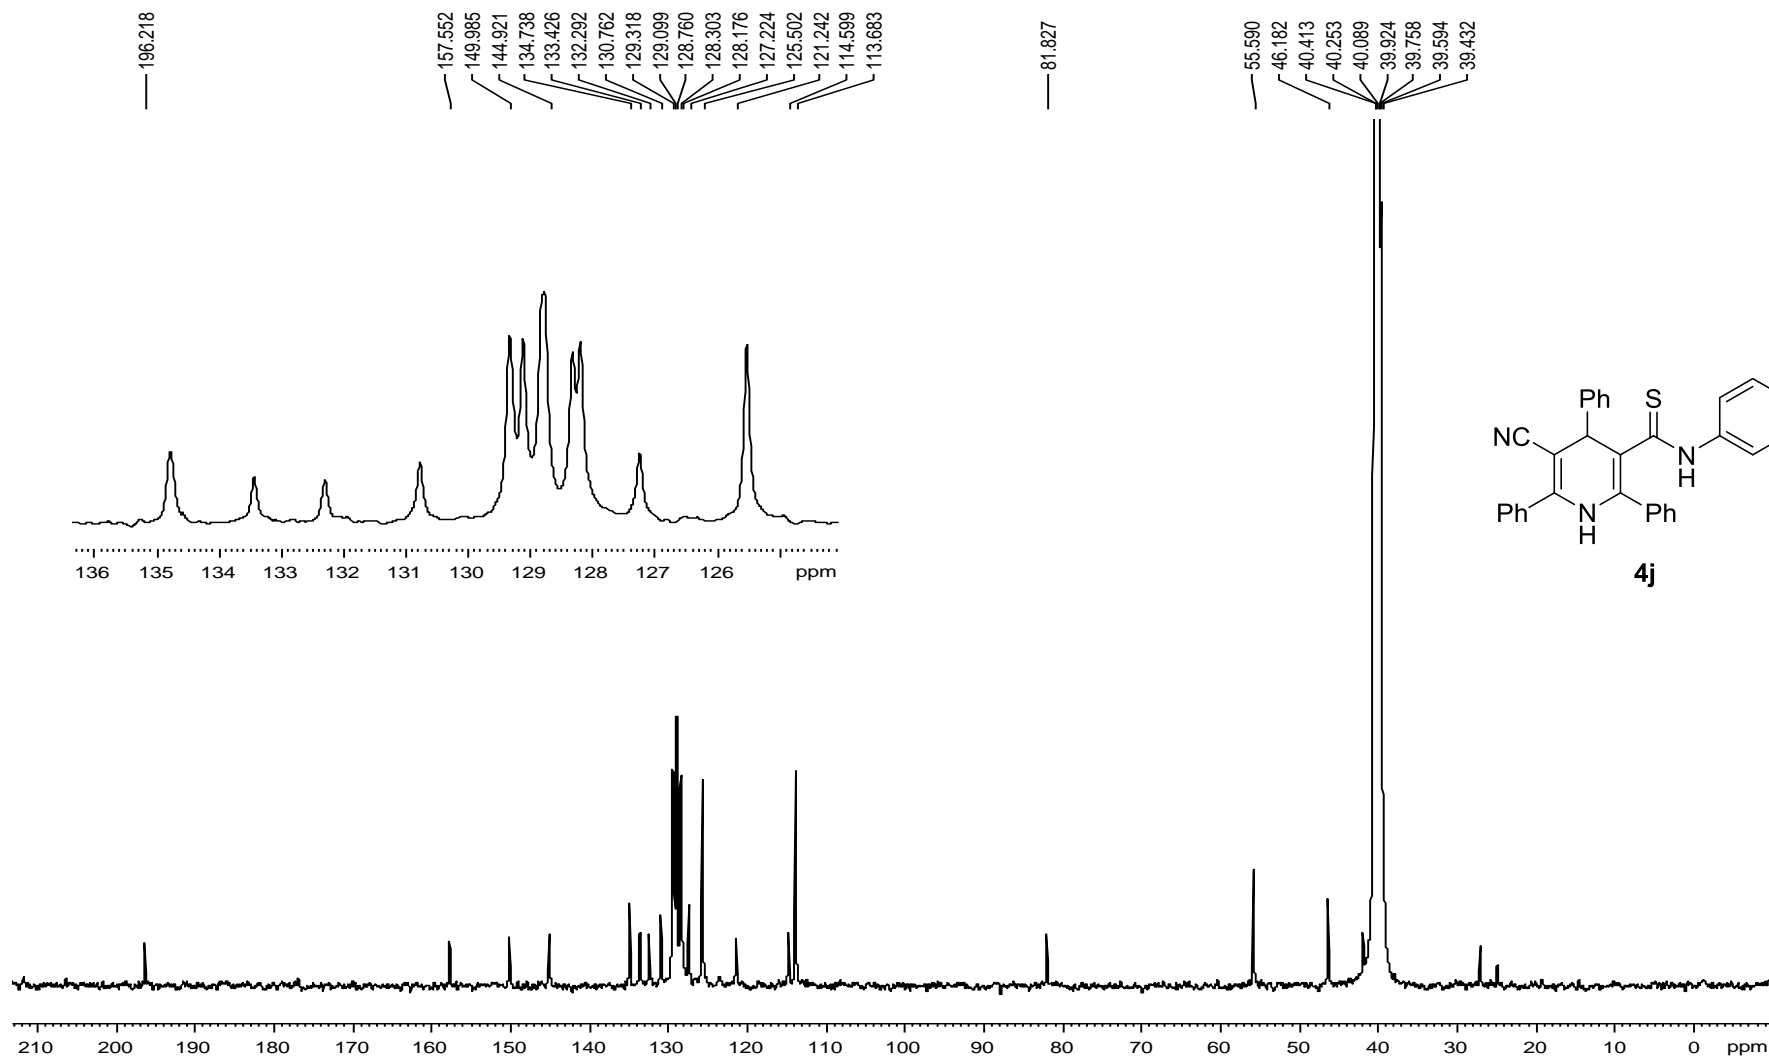

SKN-P-32

<sup>1</sup>H 2015 1105

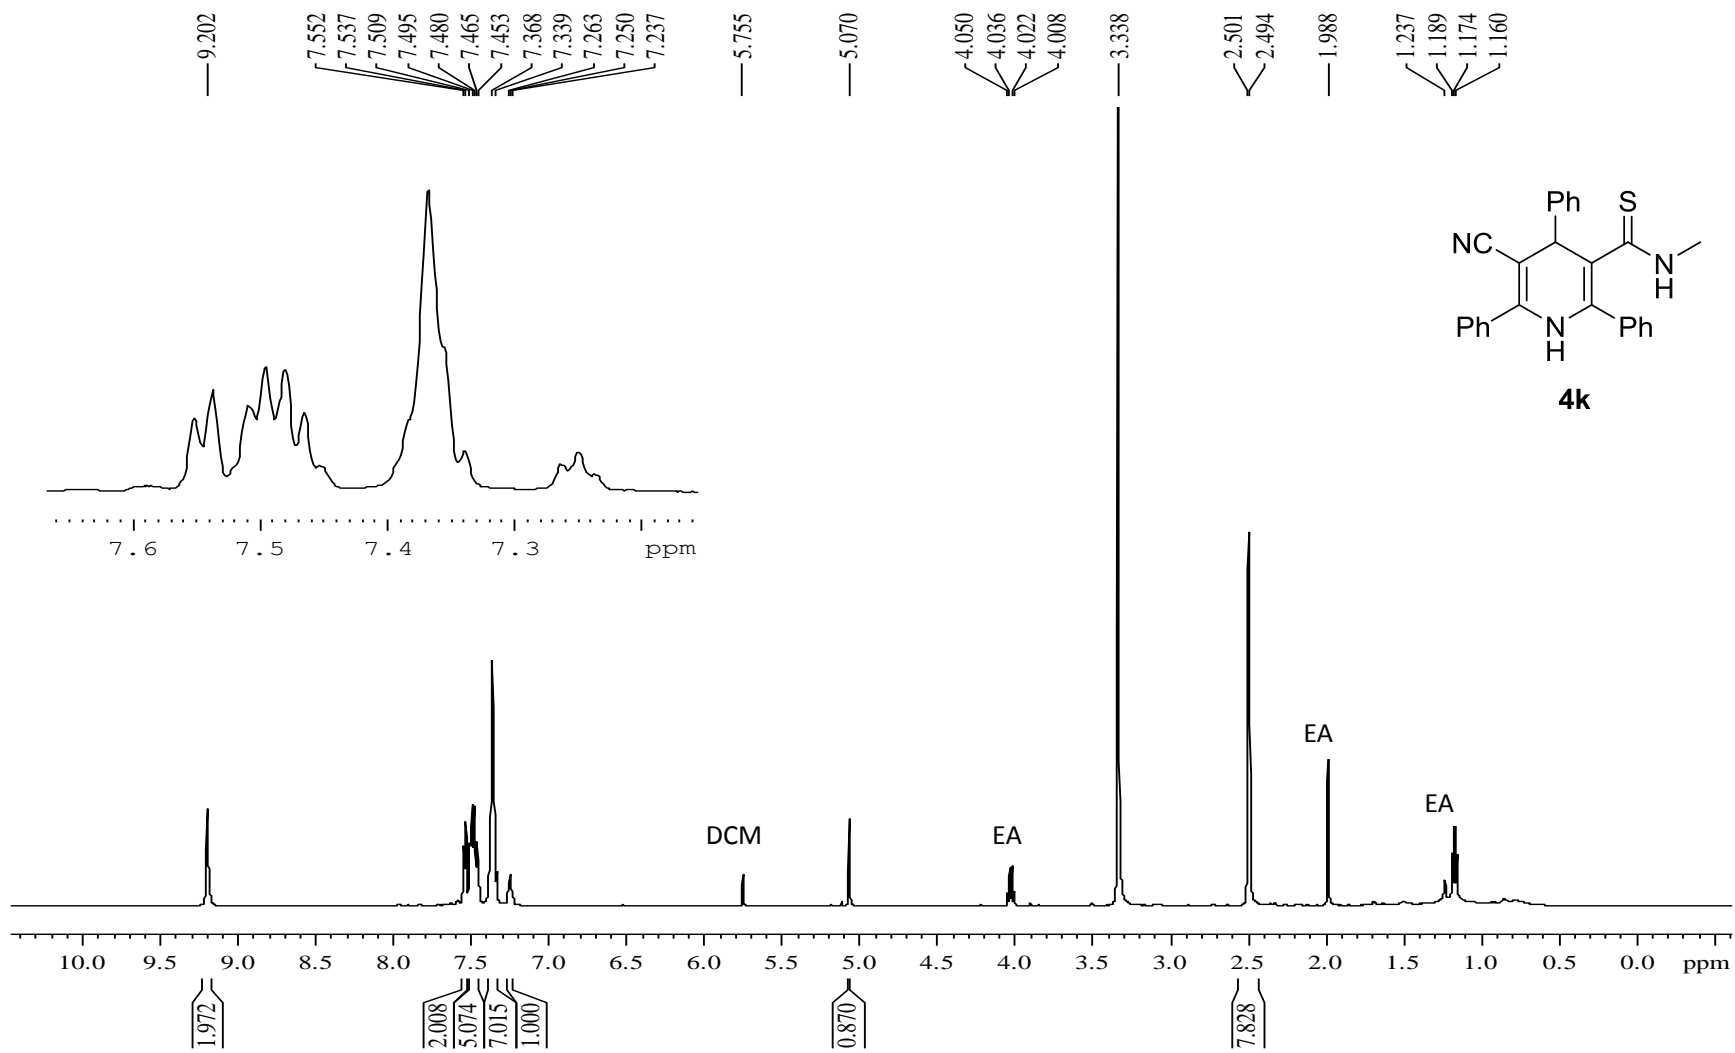



SKN-P-32 13C 2015 11 06

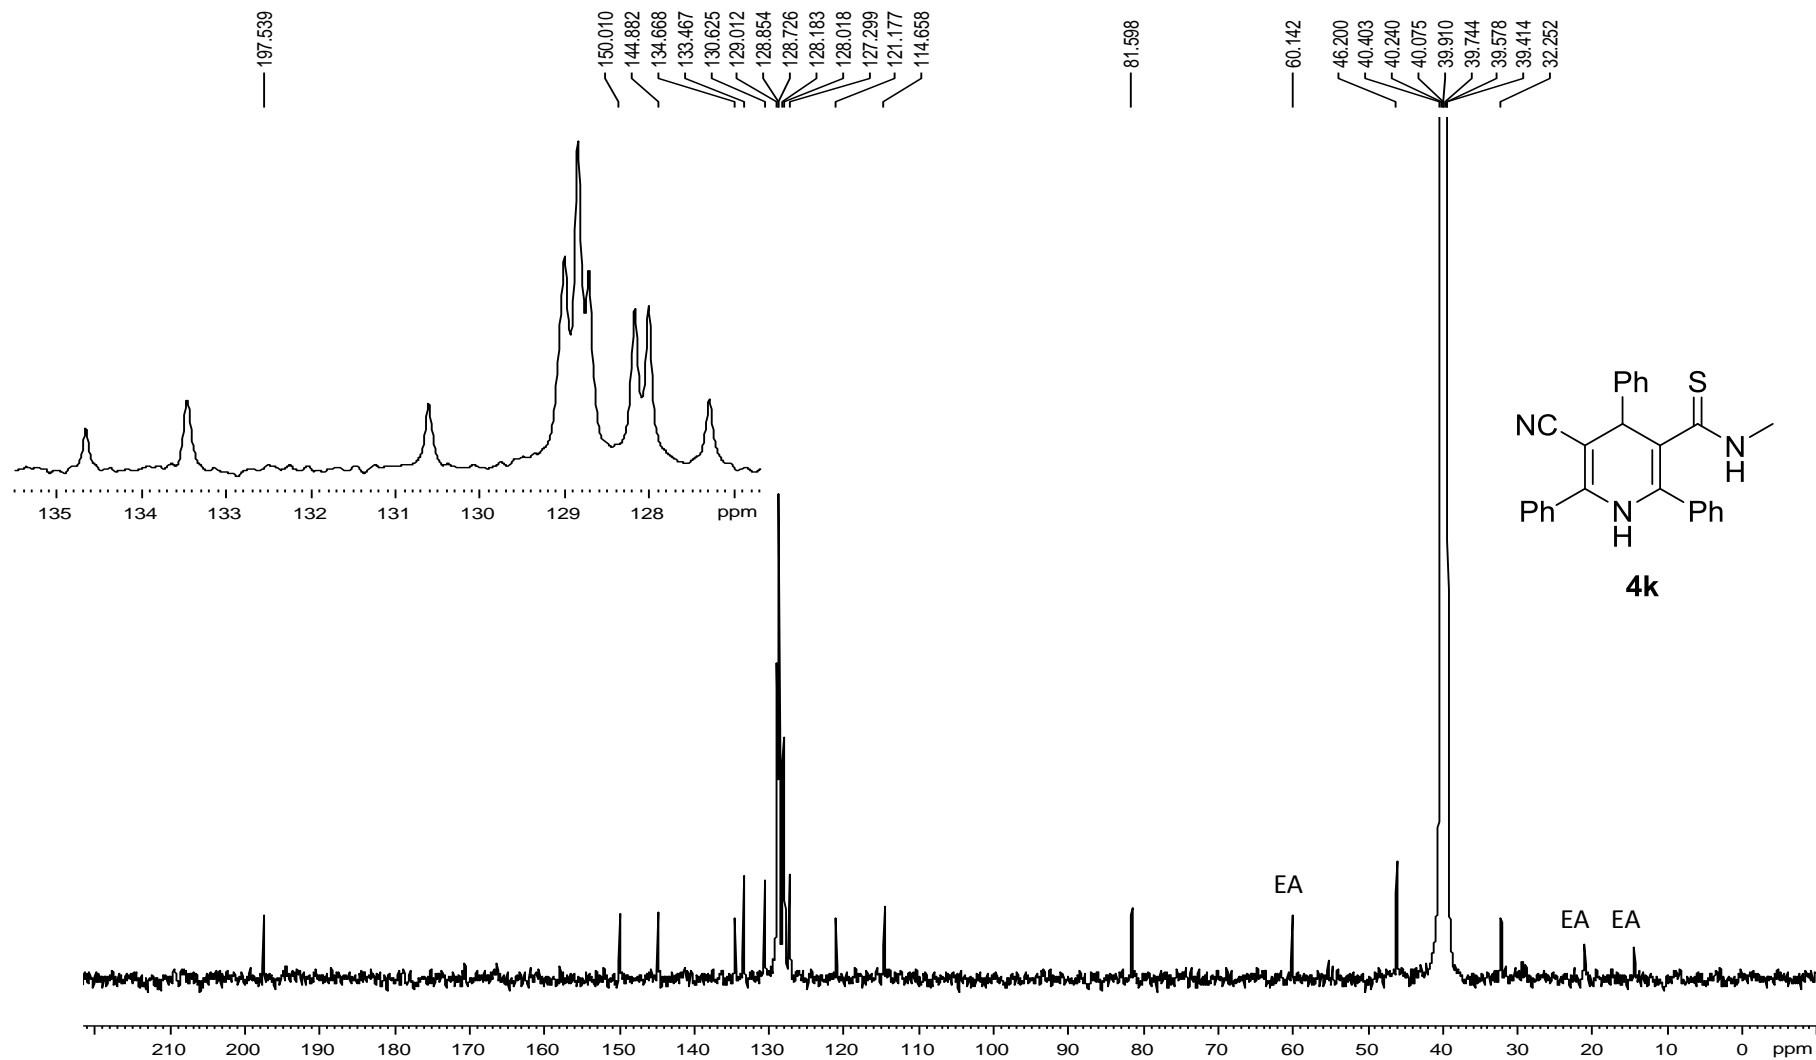

— SKN-P-20

1H 2015 04 03

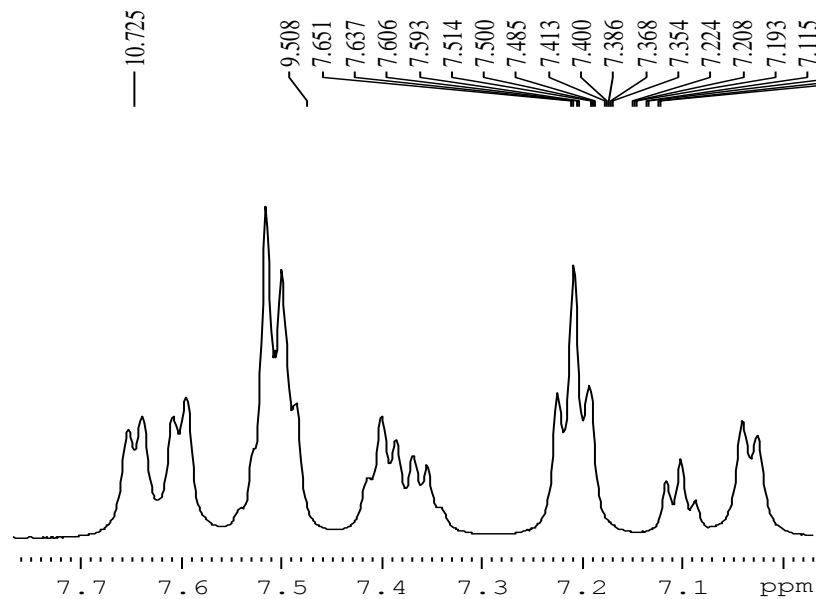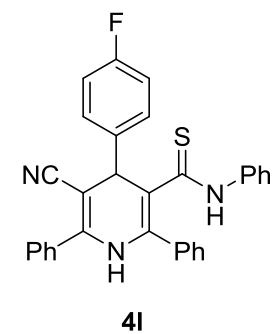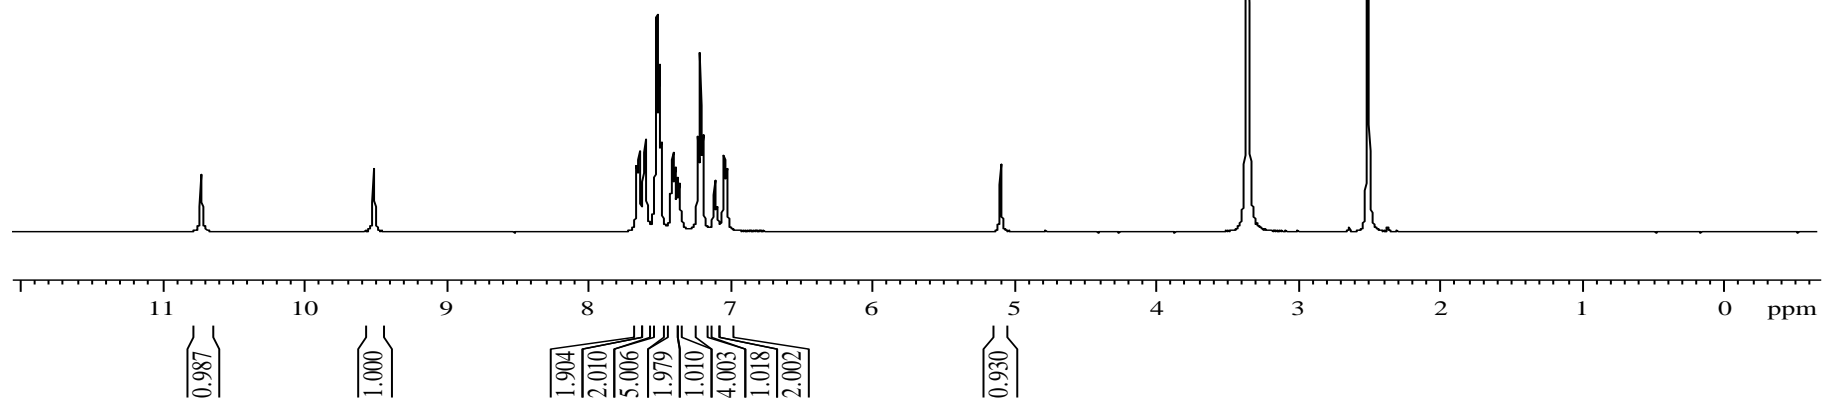

SKN-P-20 13C 2015 04 09

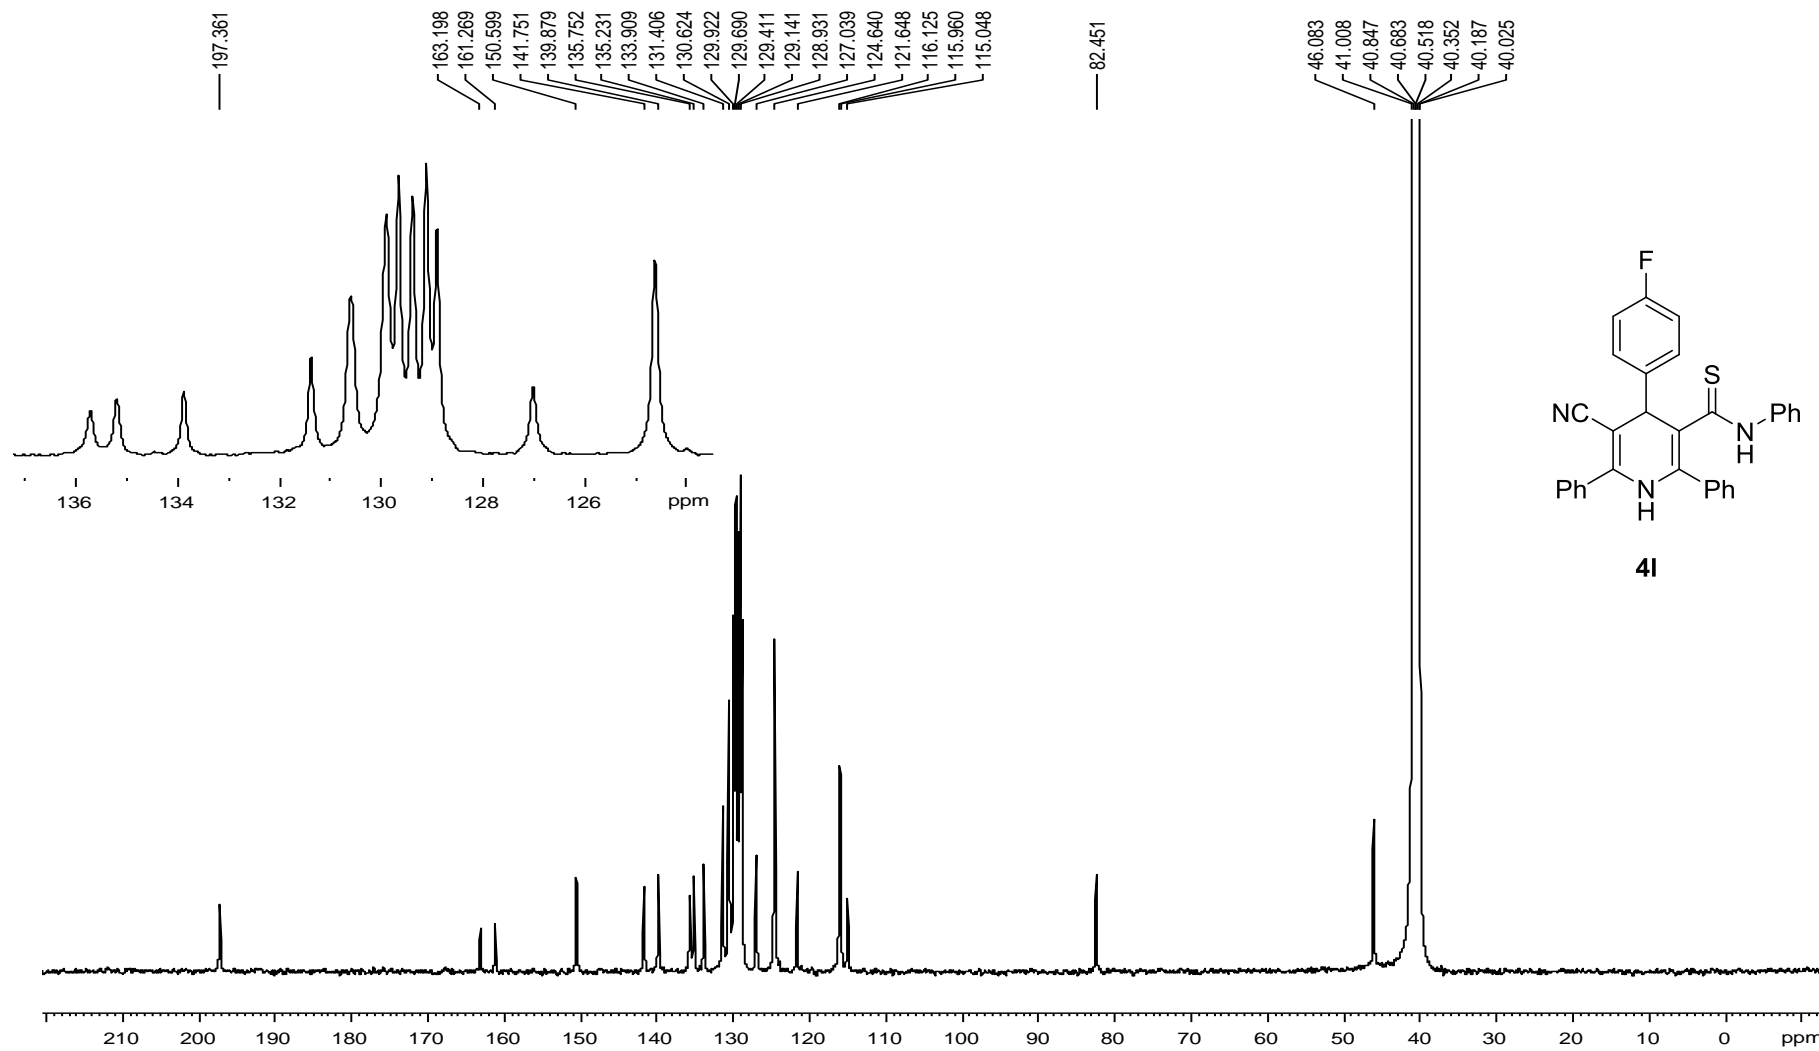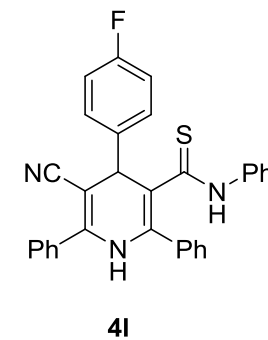

skn-p-12a 1H 2015 01 16

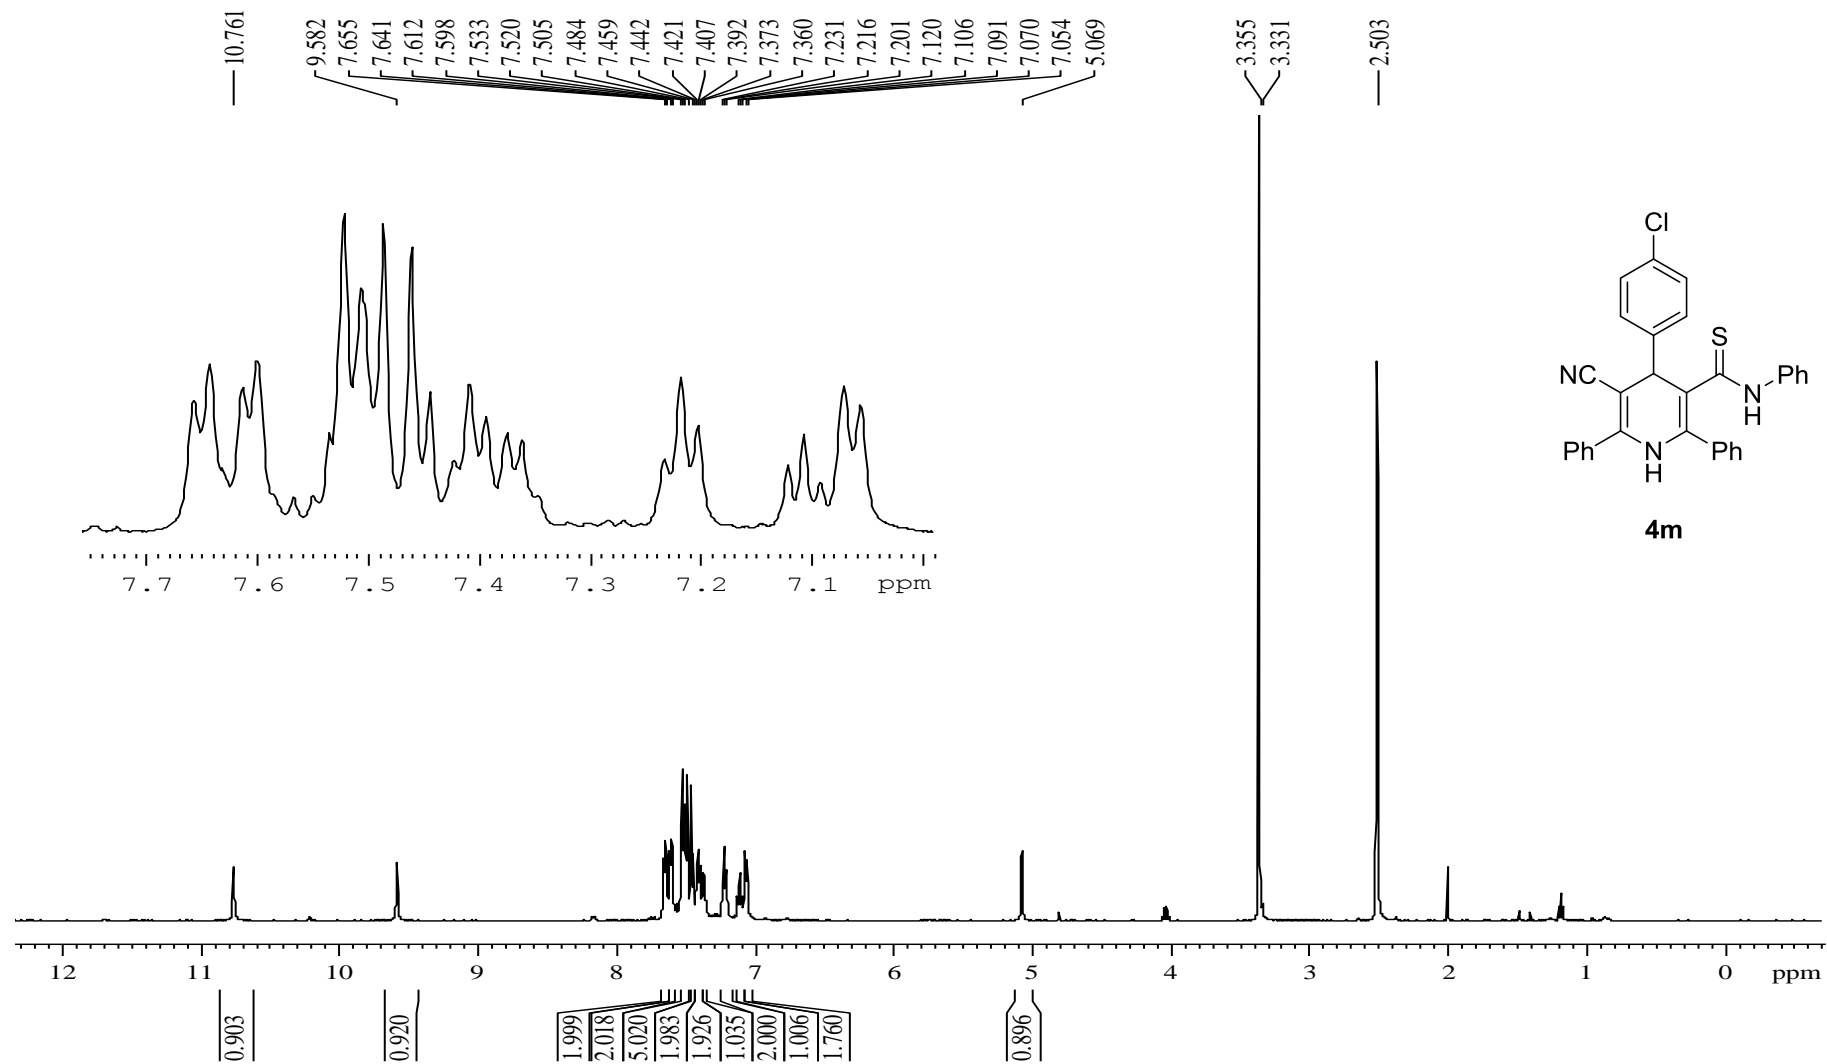

SKN-P-2a 13C 2015 01 21

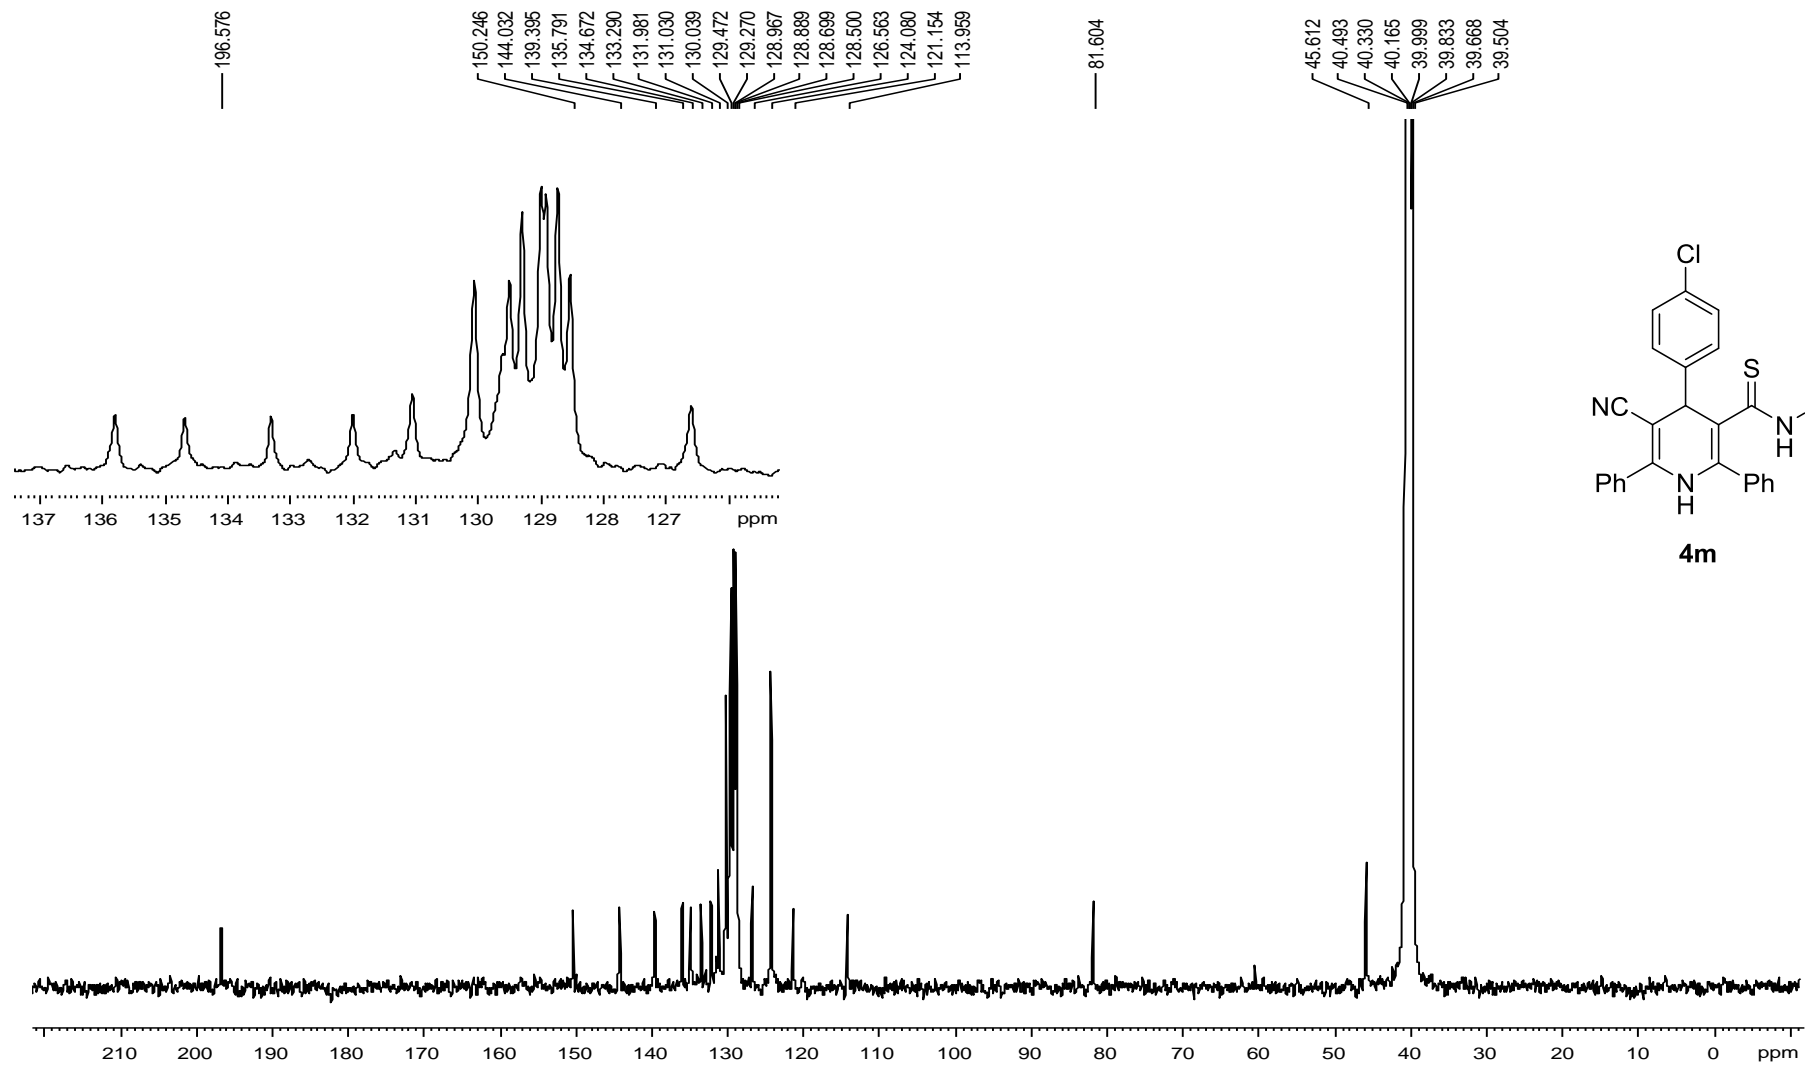

skn-p-13

1H 2015 01 22

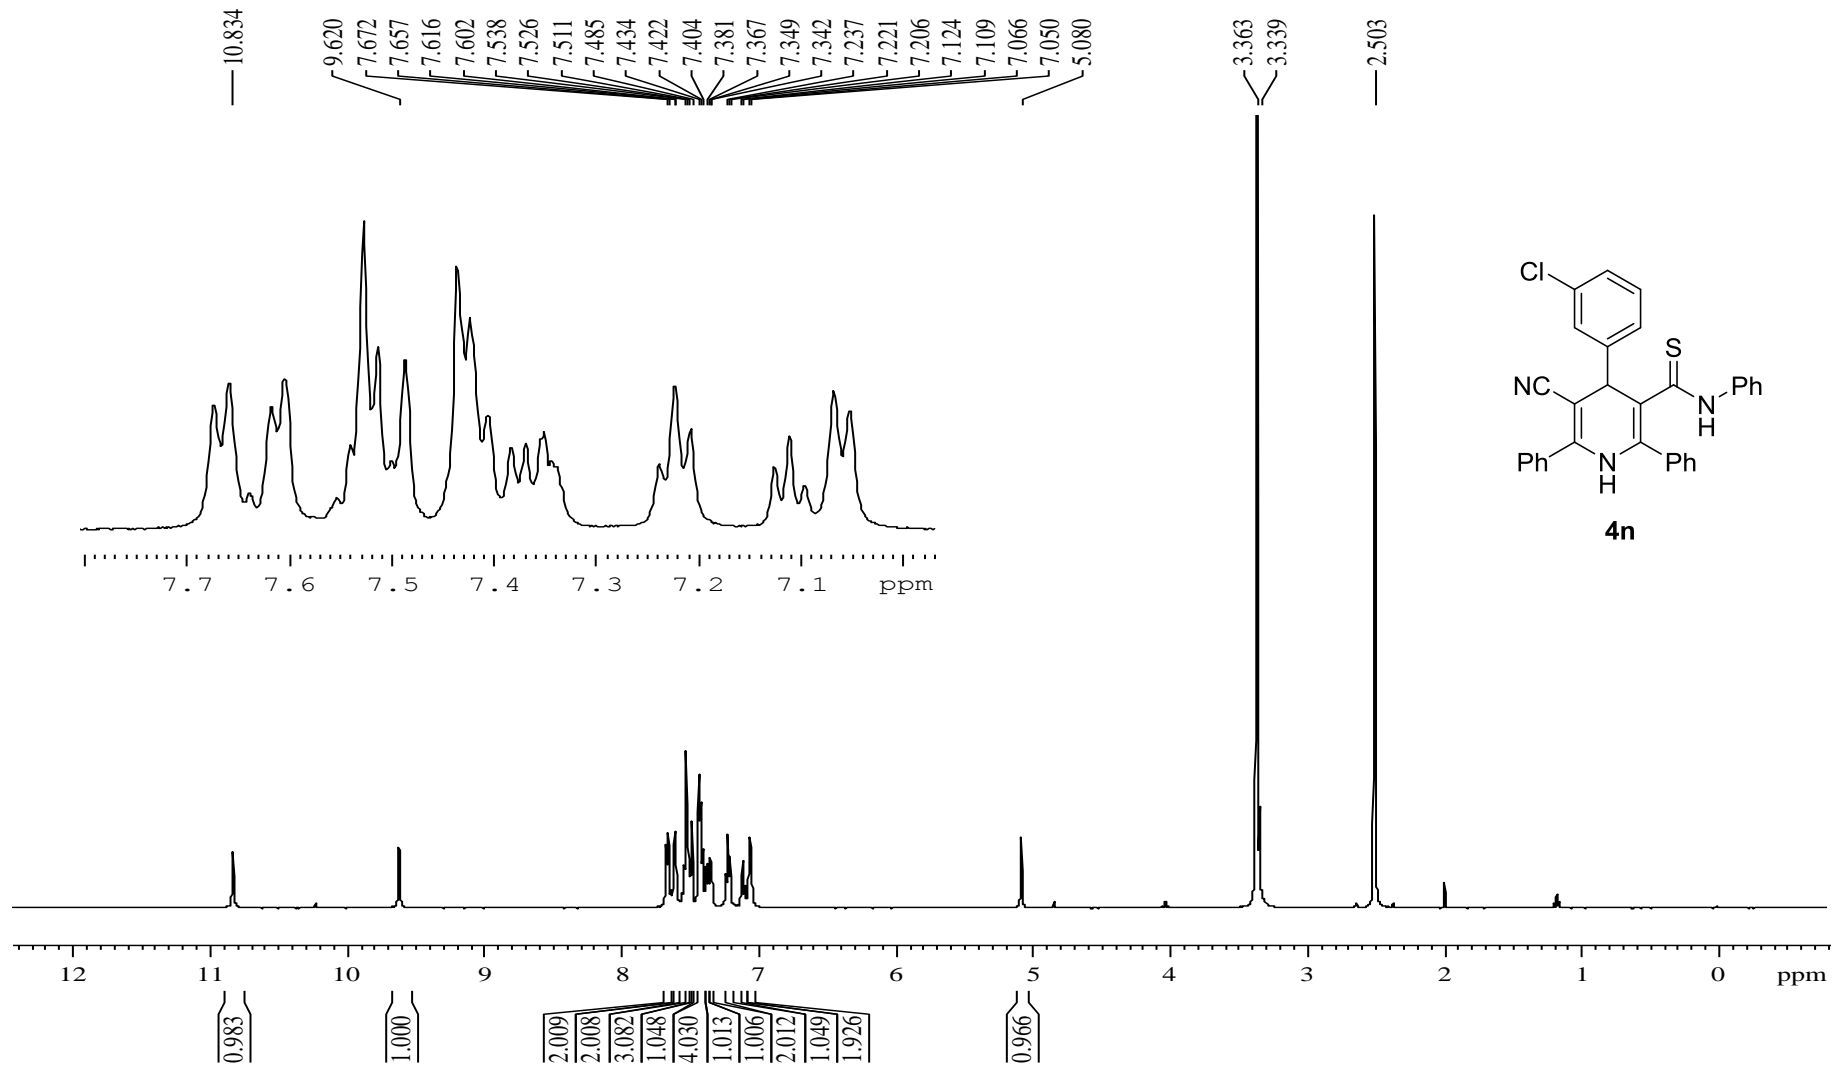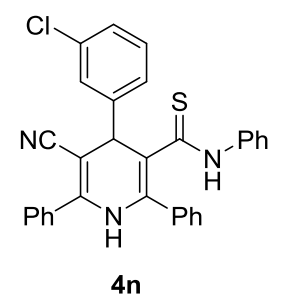

skn-p-13 13C 2015 01 22

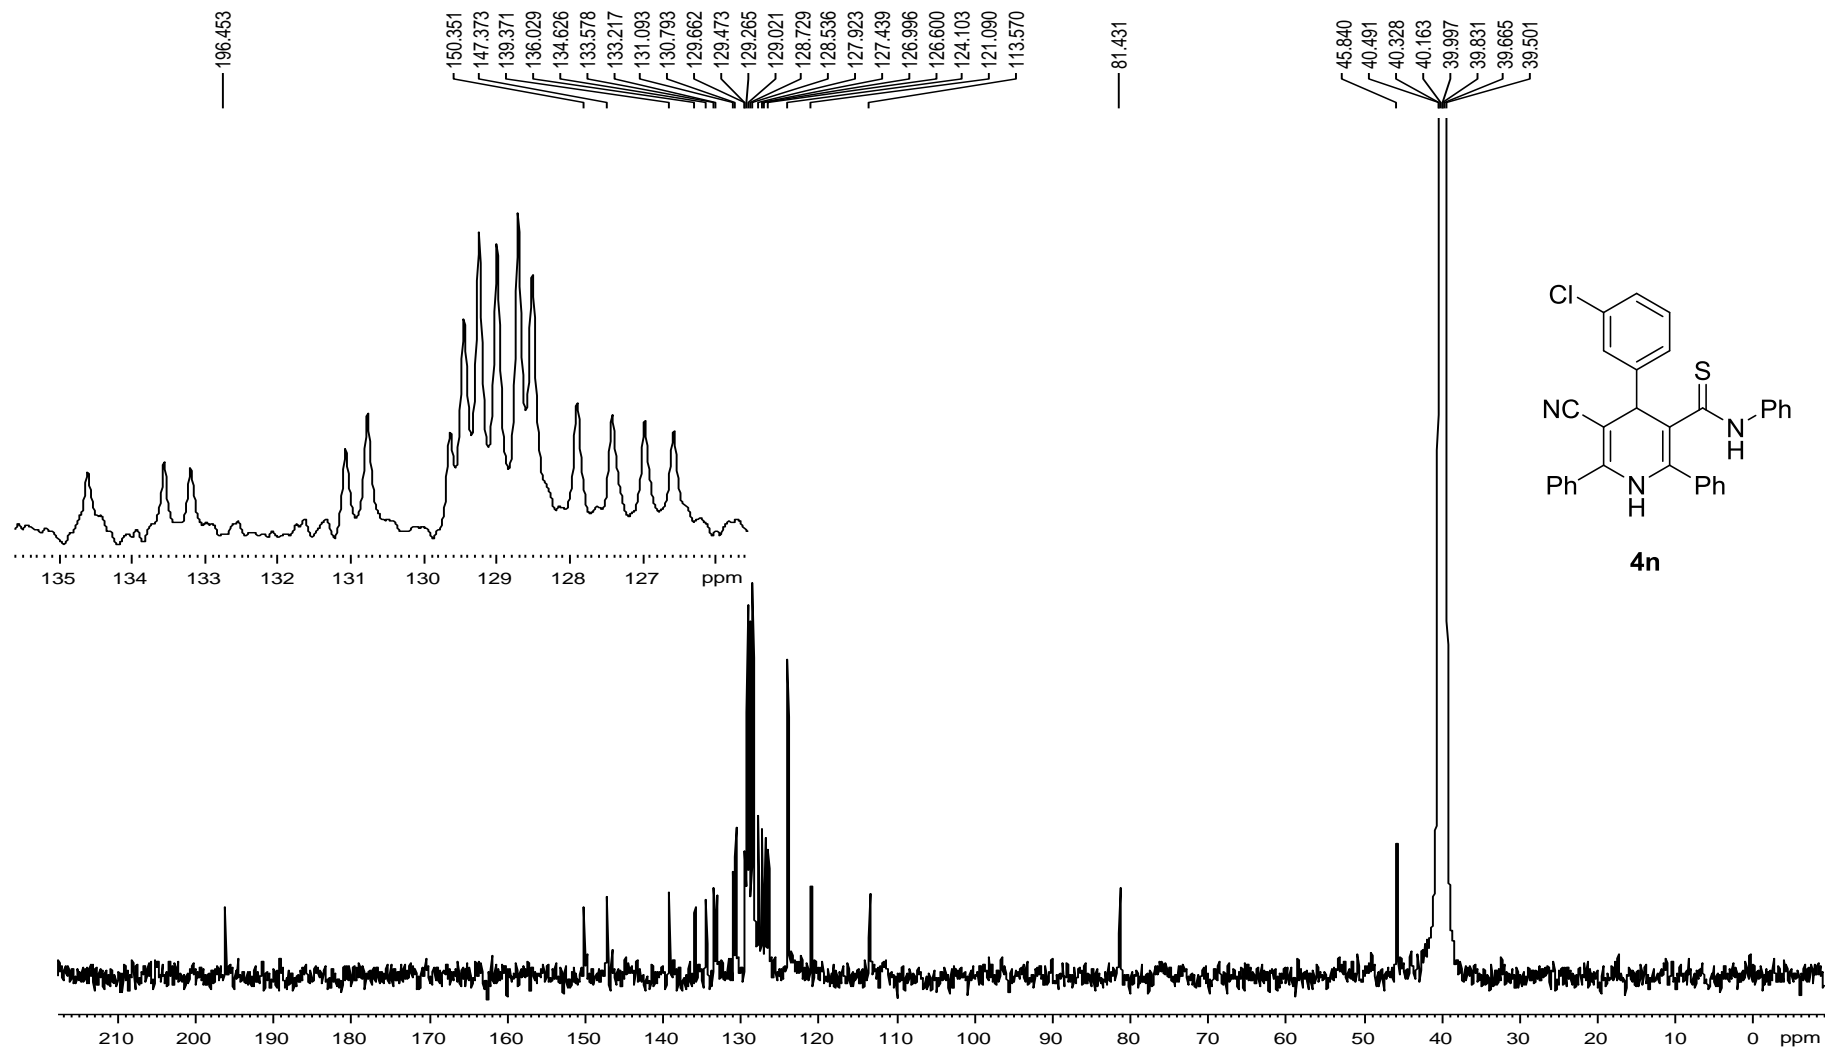

SKN-P-14-0303

1H 2015 04 03

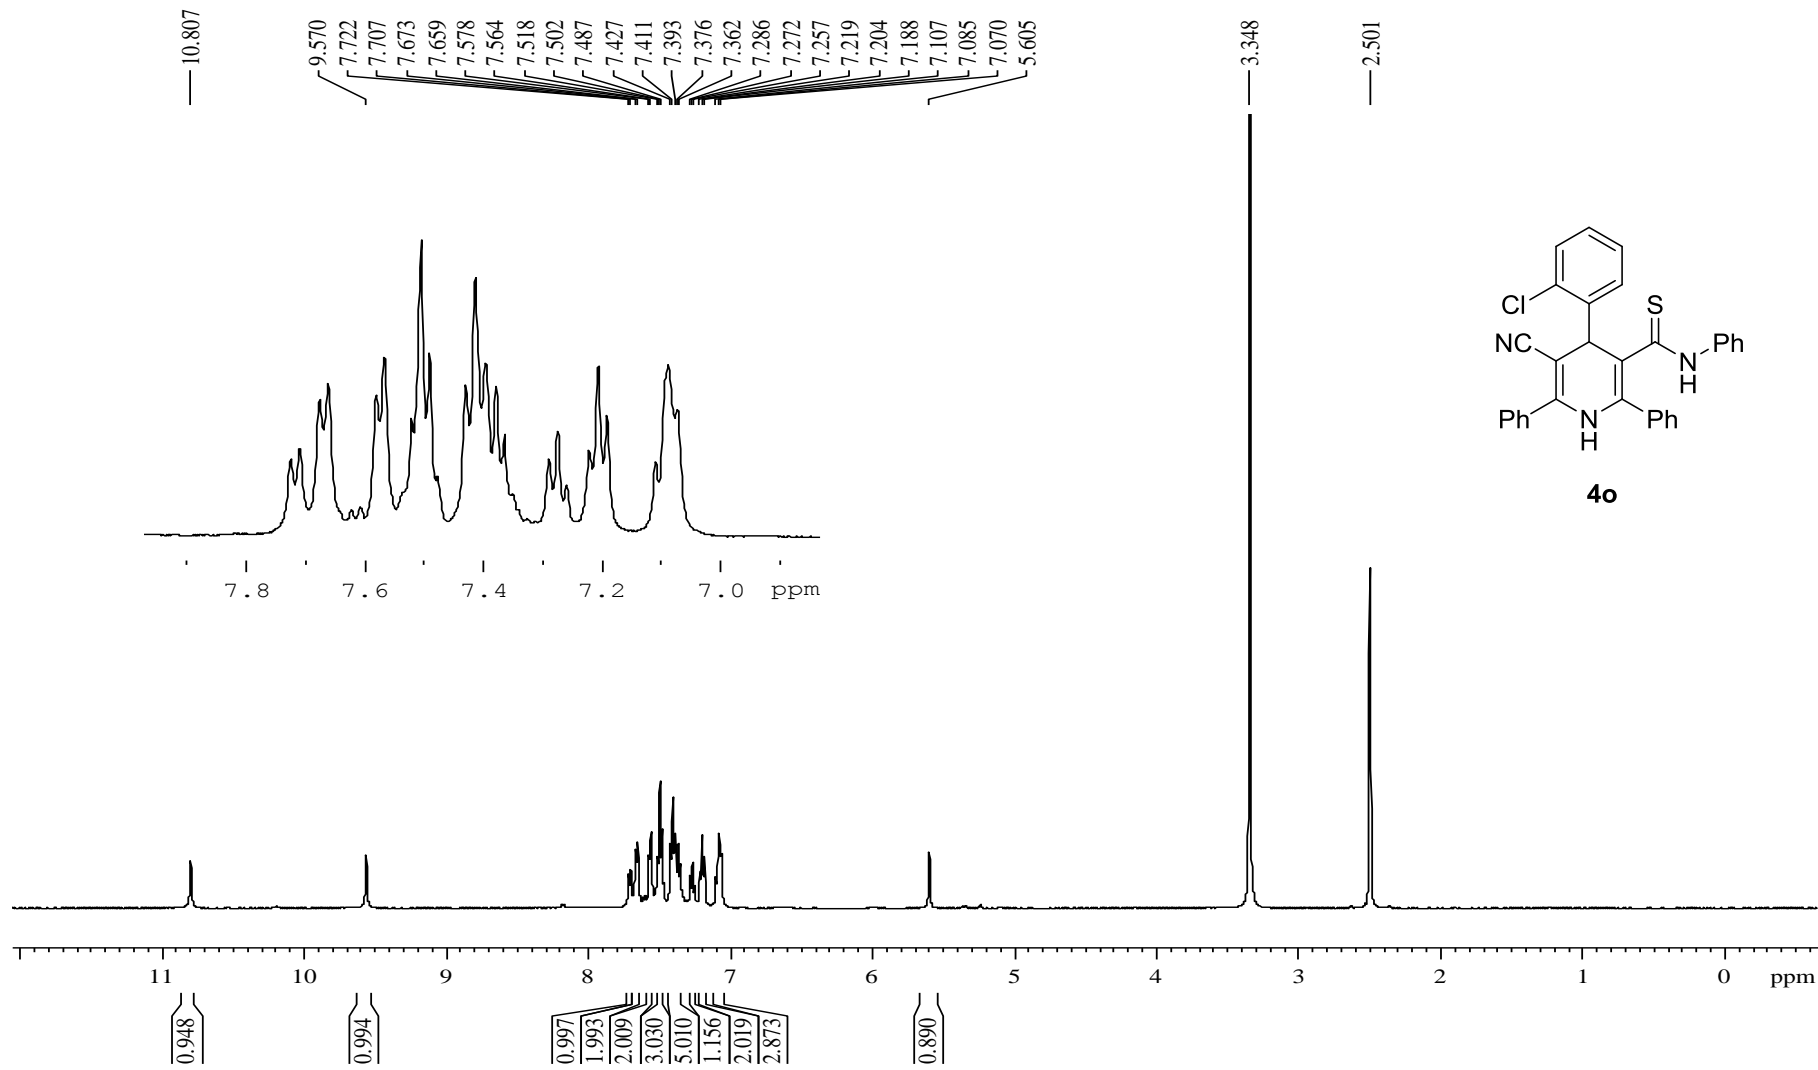





SKN-P-17

1H 2015 04 03

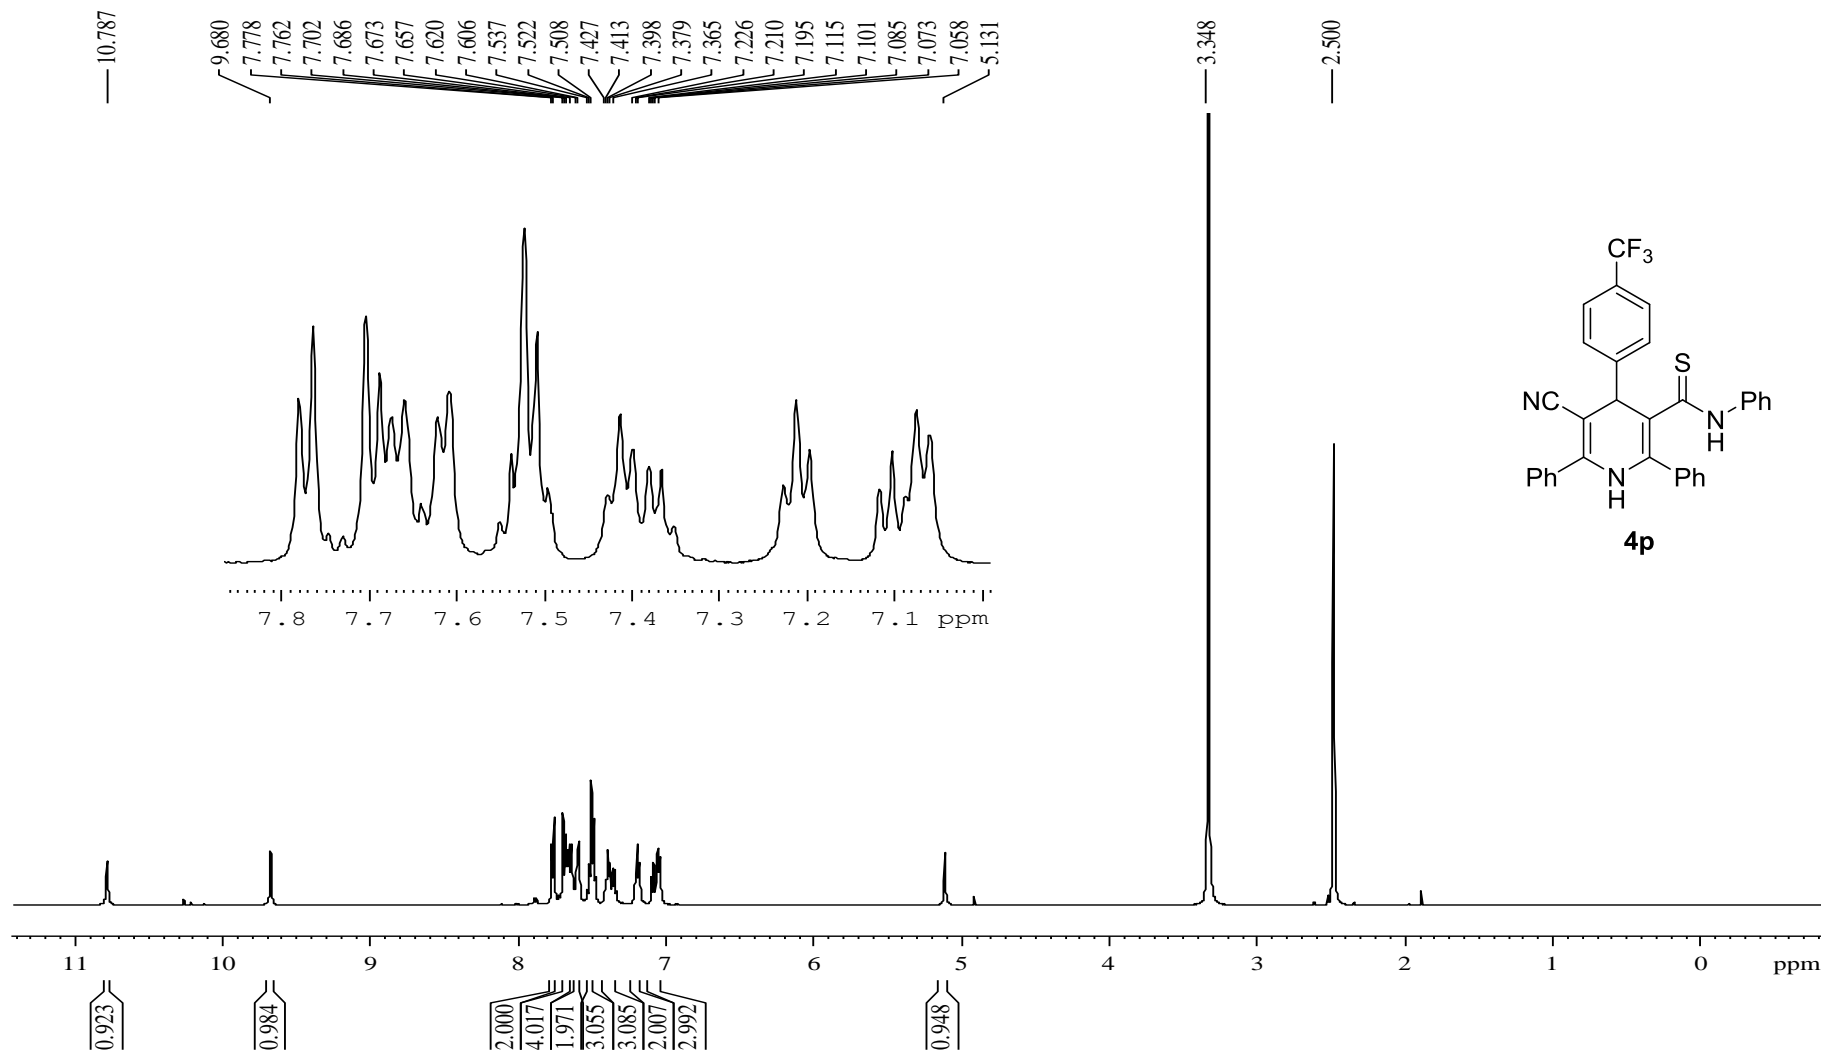

SKN-P-17 13C 2015 04 09

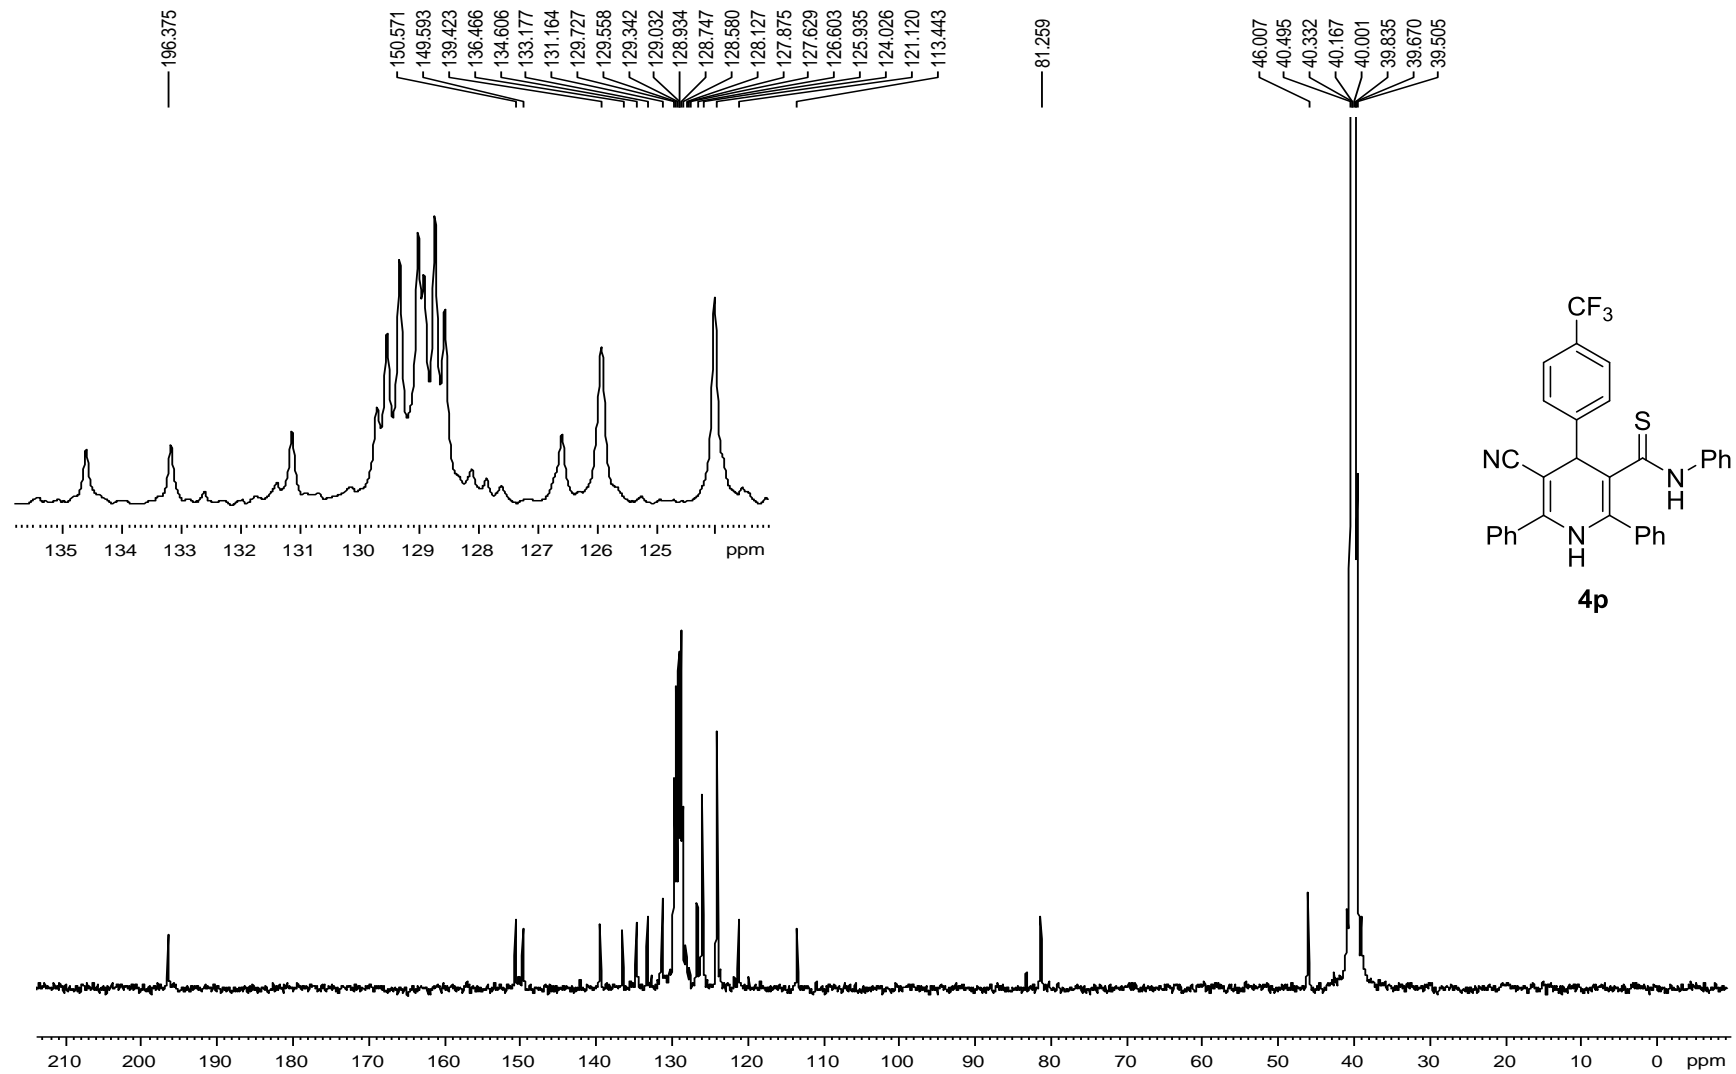

— SKN-P-18

1H 2015 04 03

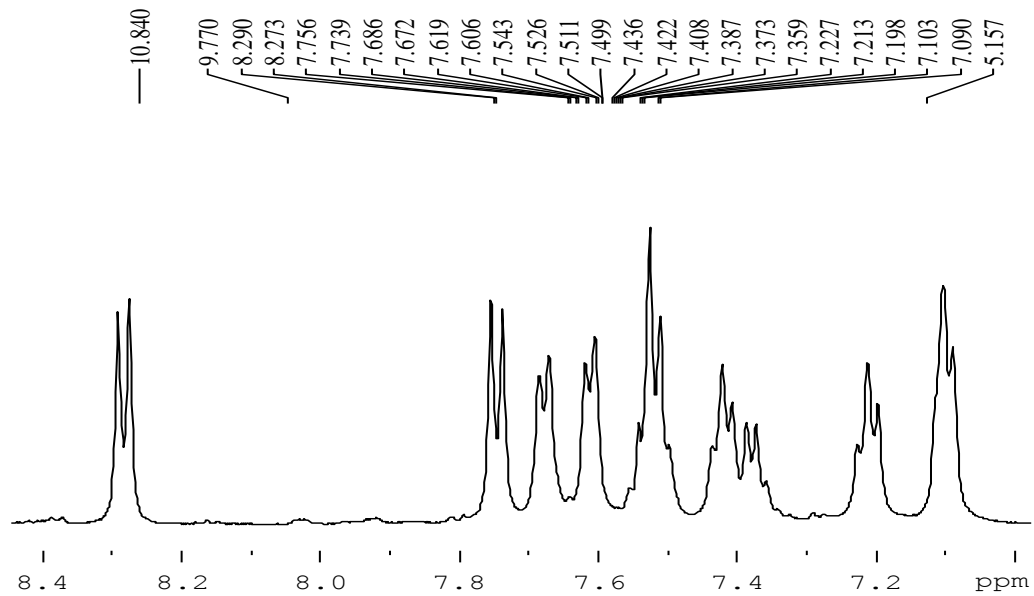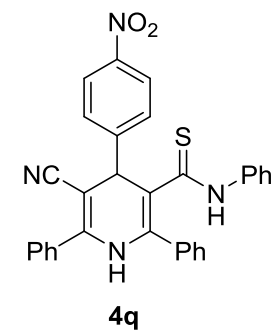

SKN-P-18 13C 2015 04 07

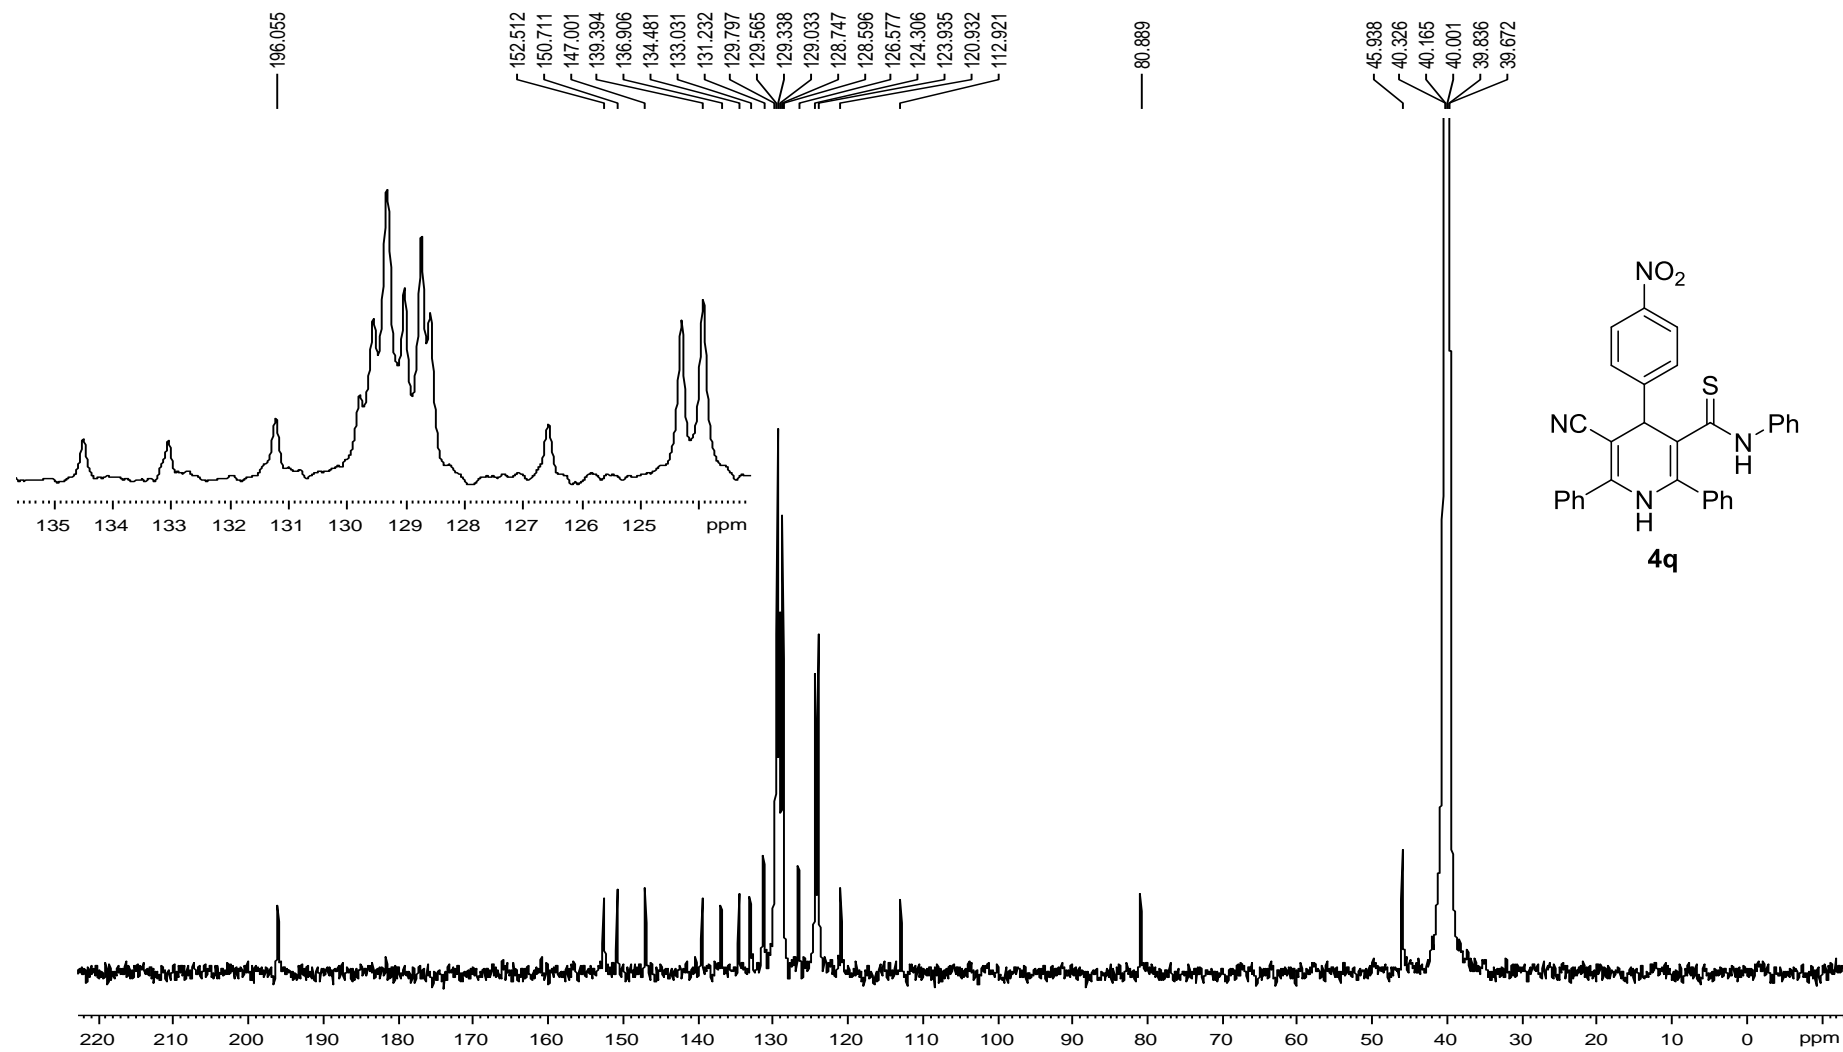

SKN-P-15

1H 2015 04 03

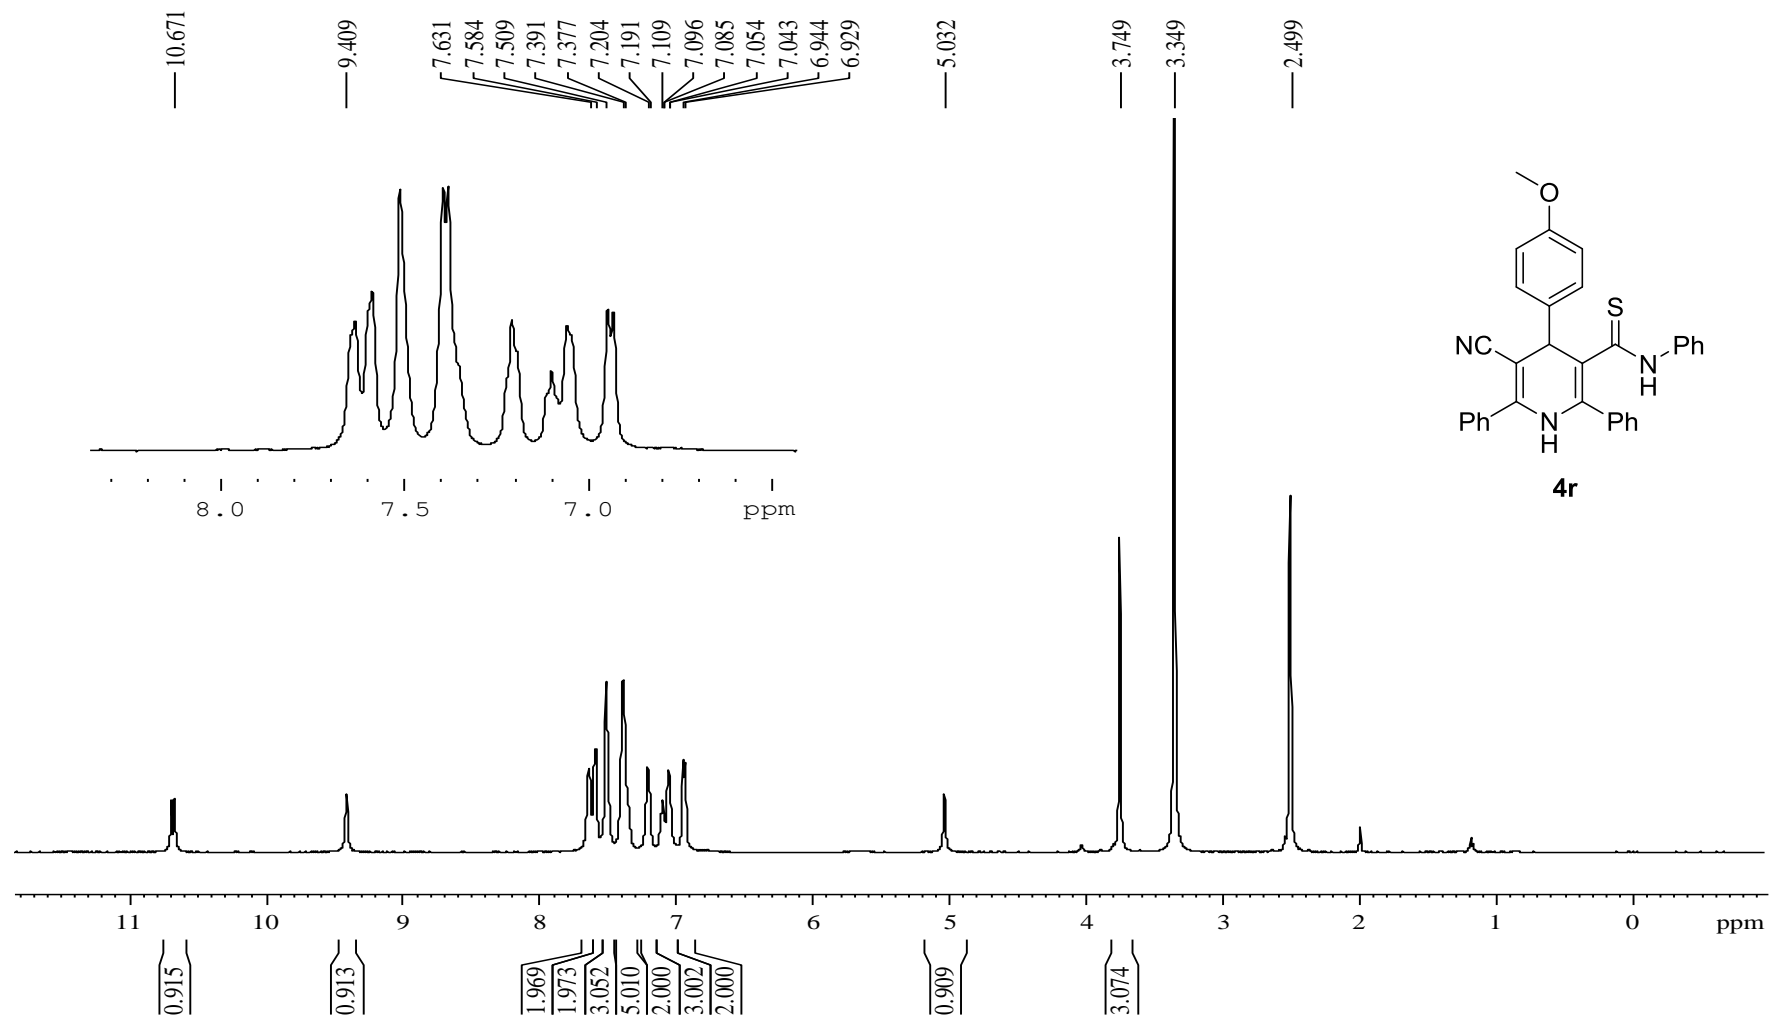

SKN-P-15

13C 2015 04 09

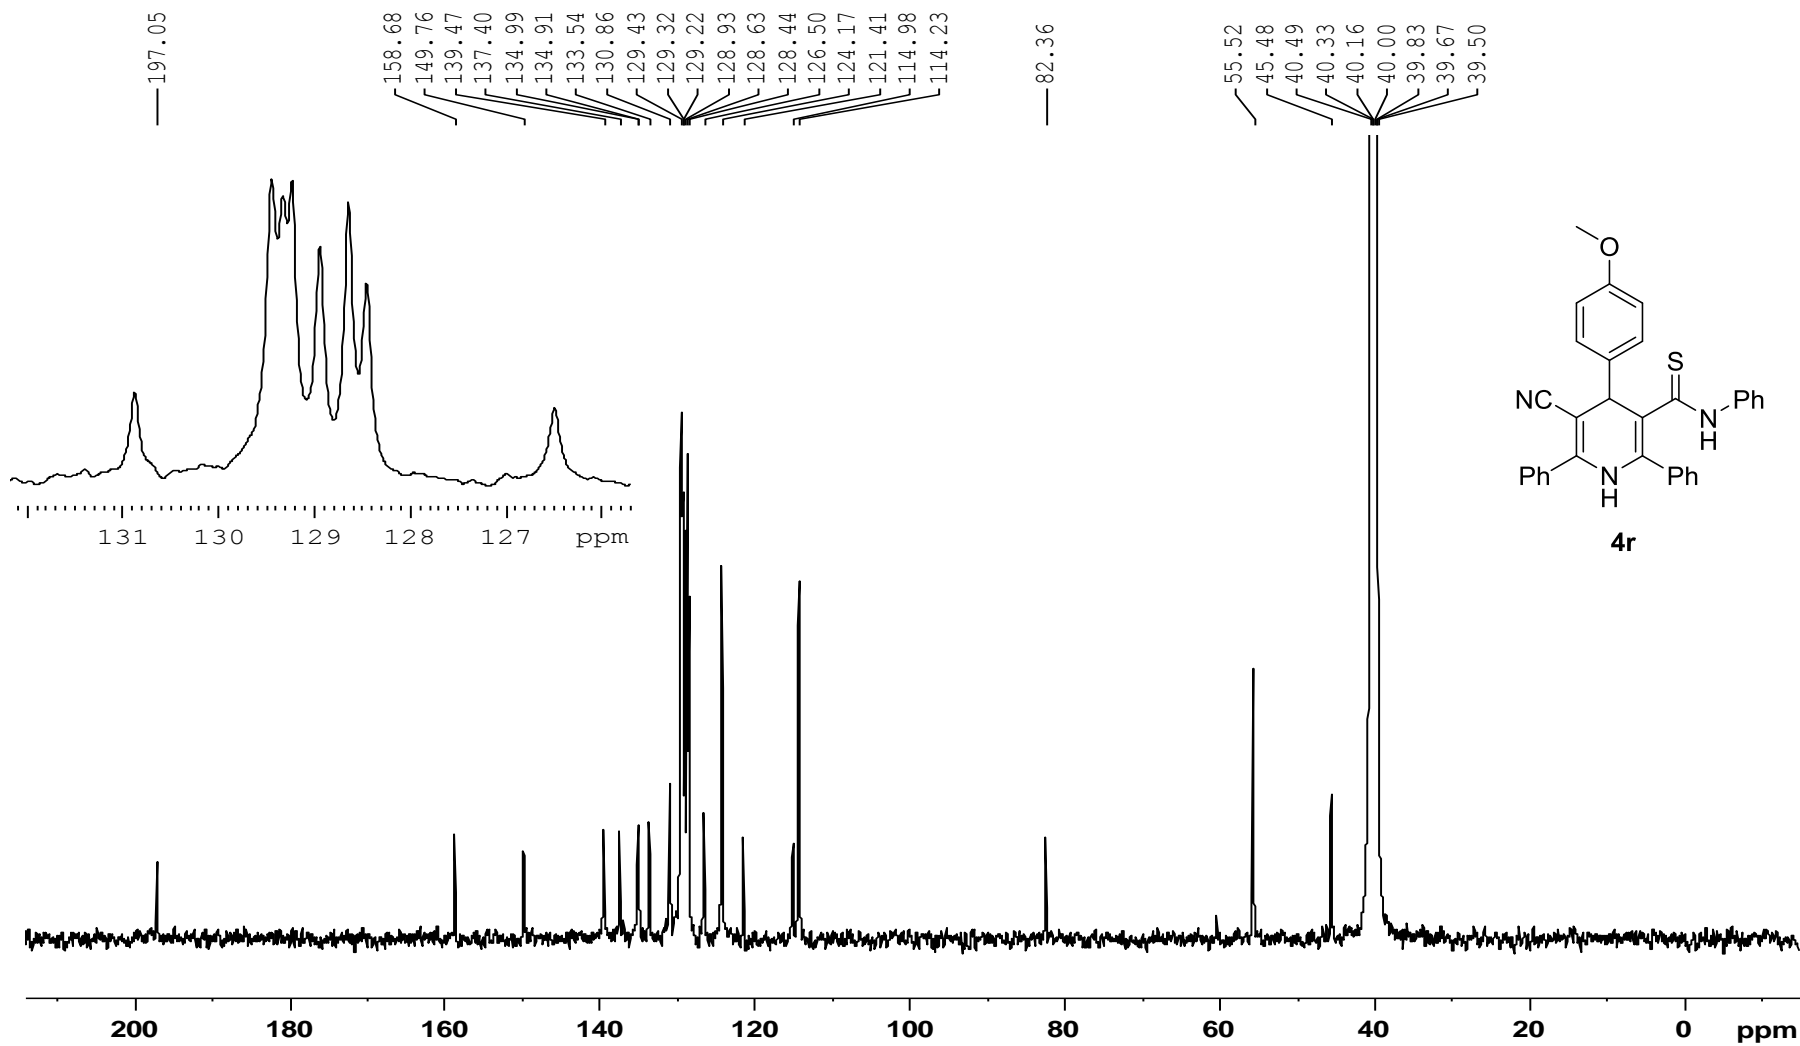

skn-p-16A

1H 2015 03 31

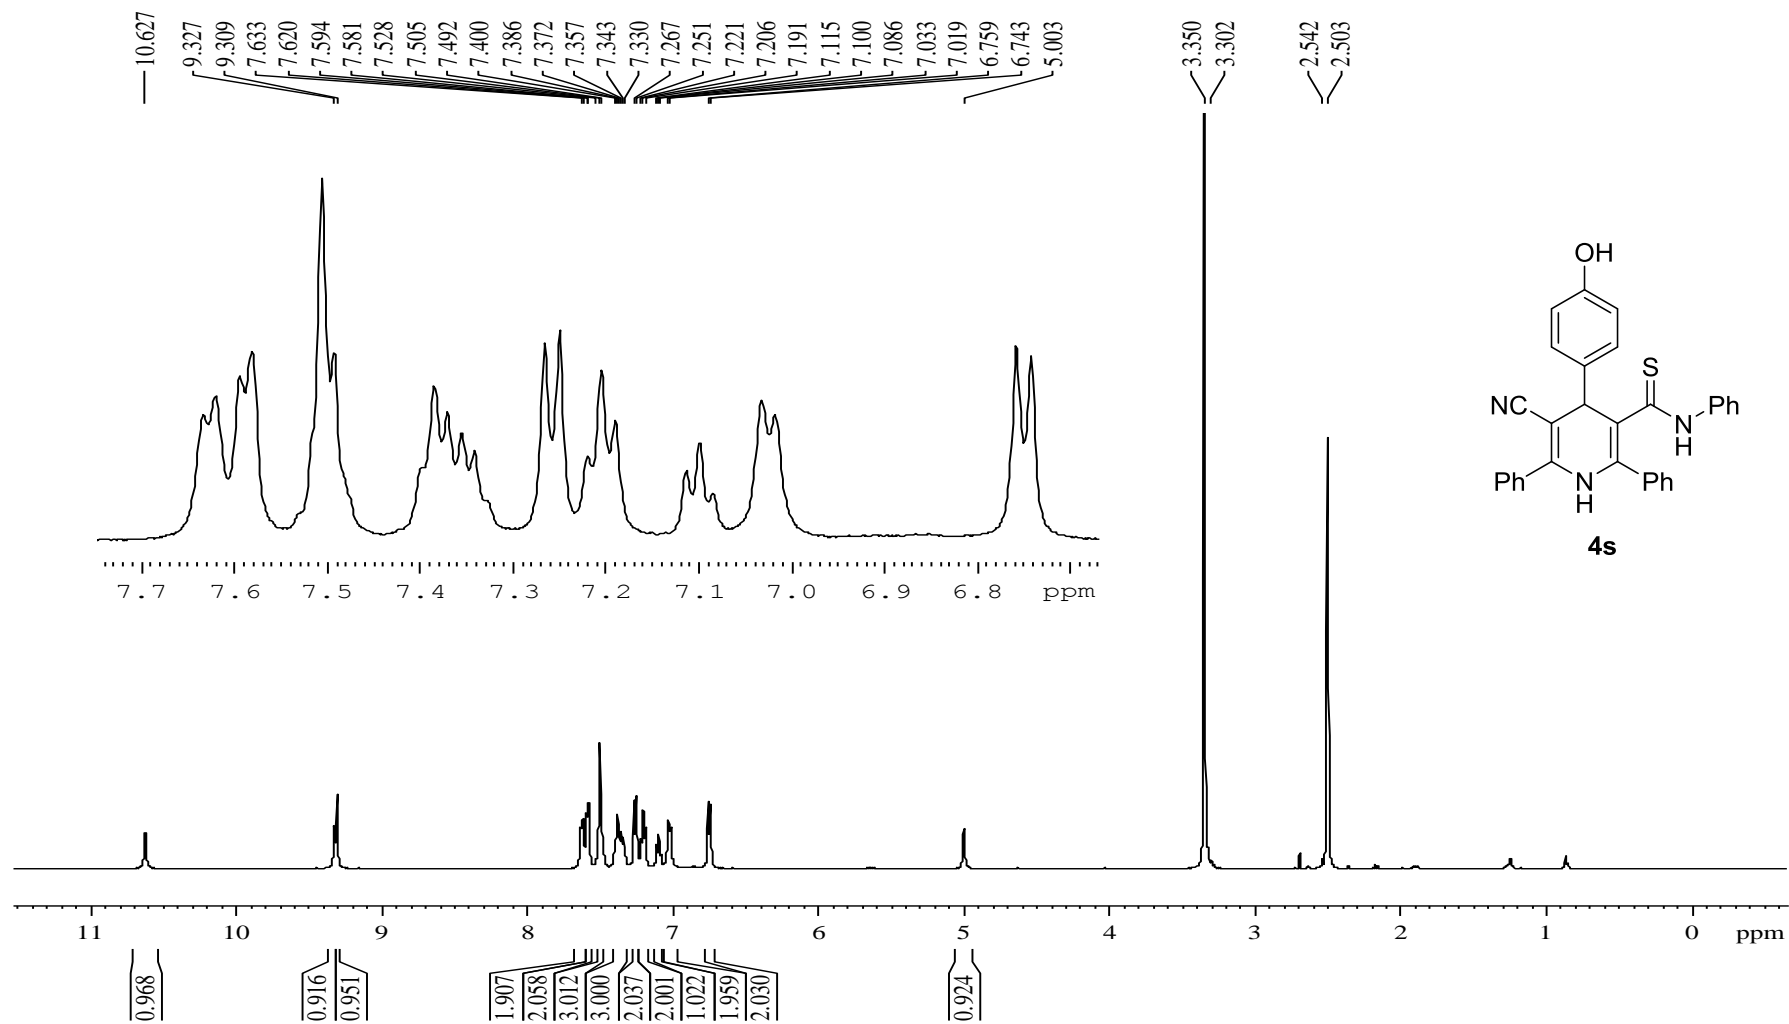



-SKN-P-16a

13C 2015 04 01

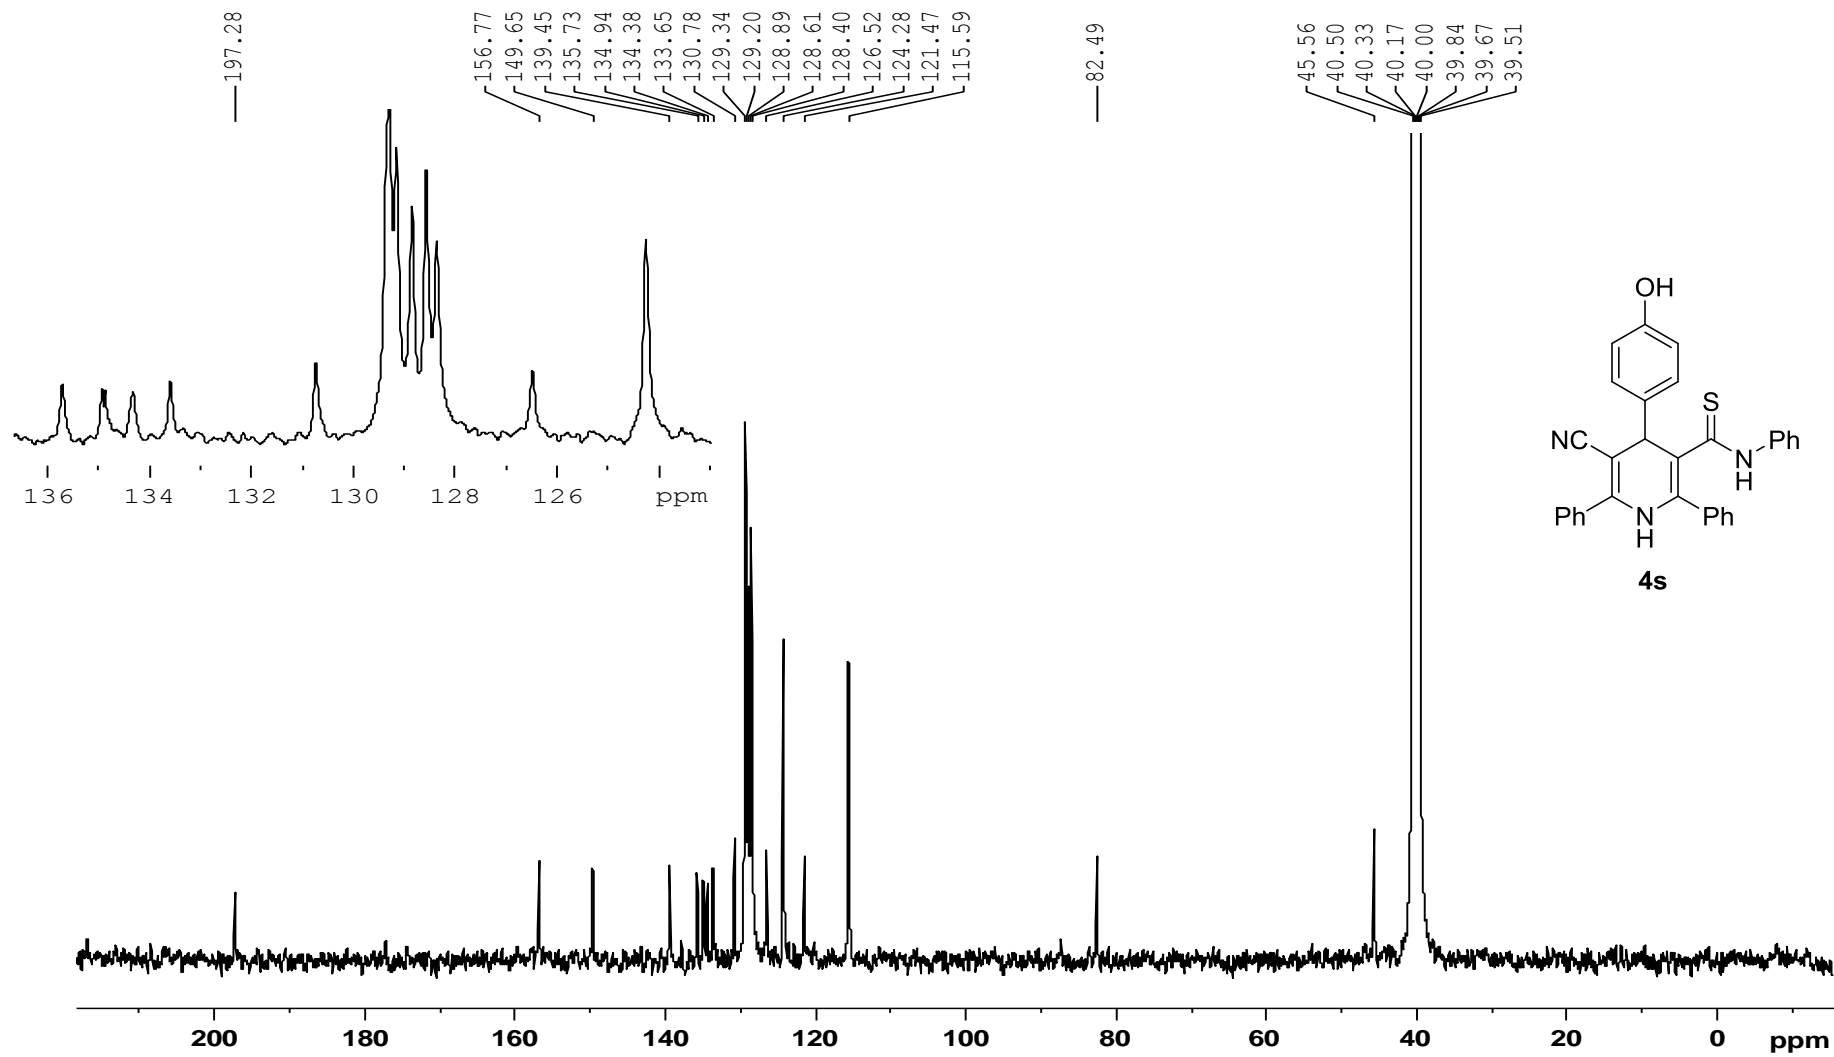

SKN-P-22

1H 2015 04 08

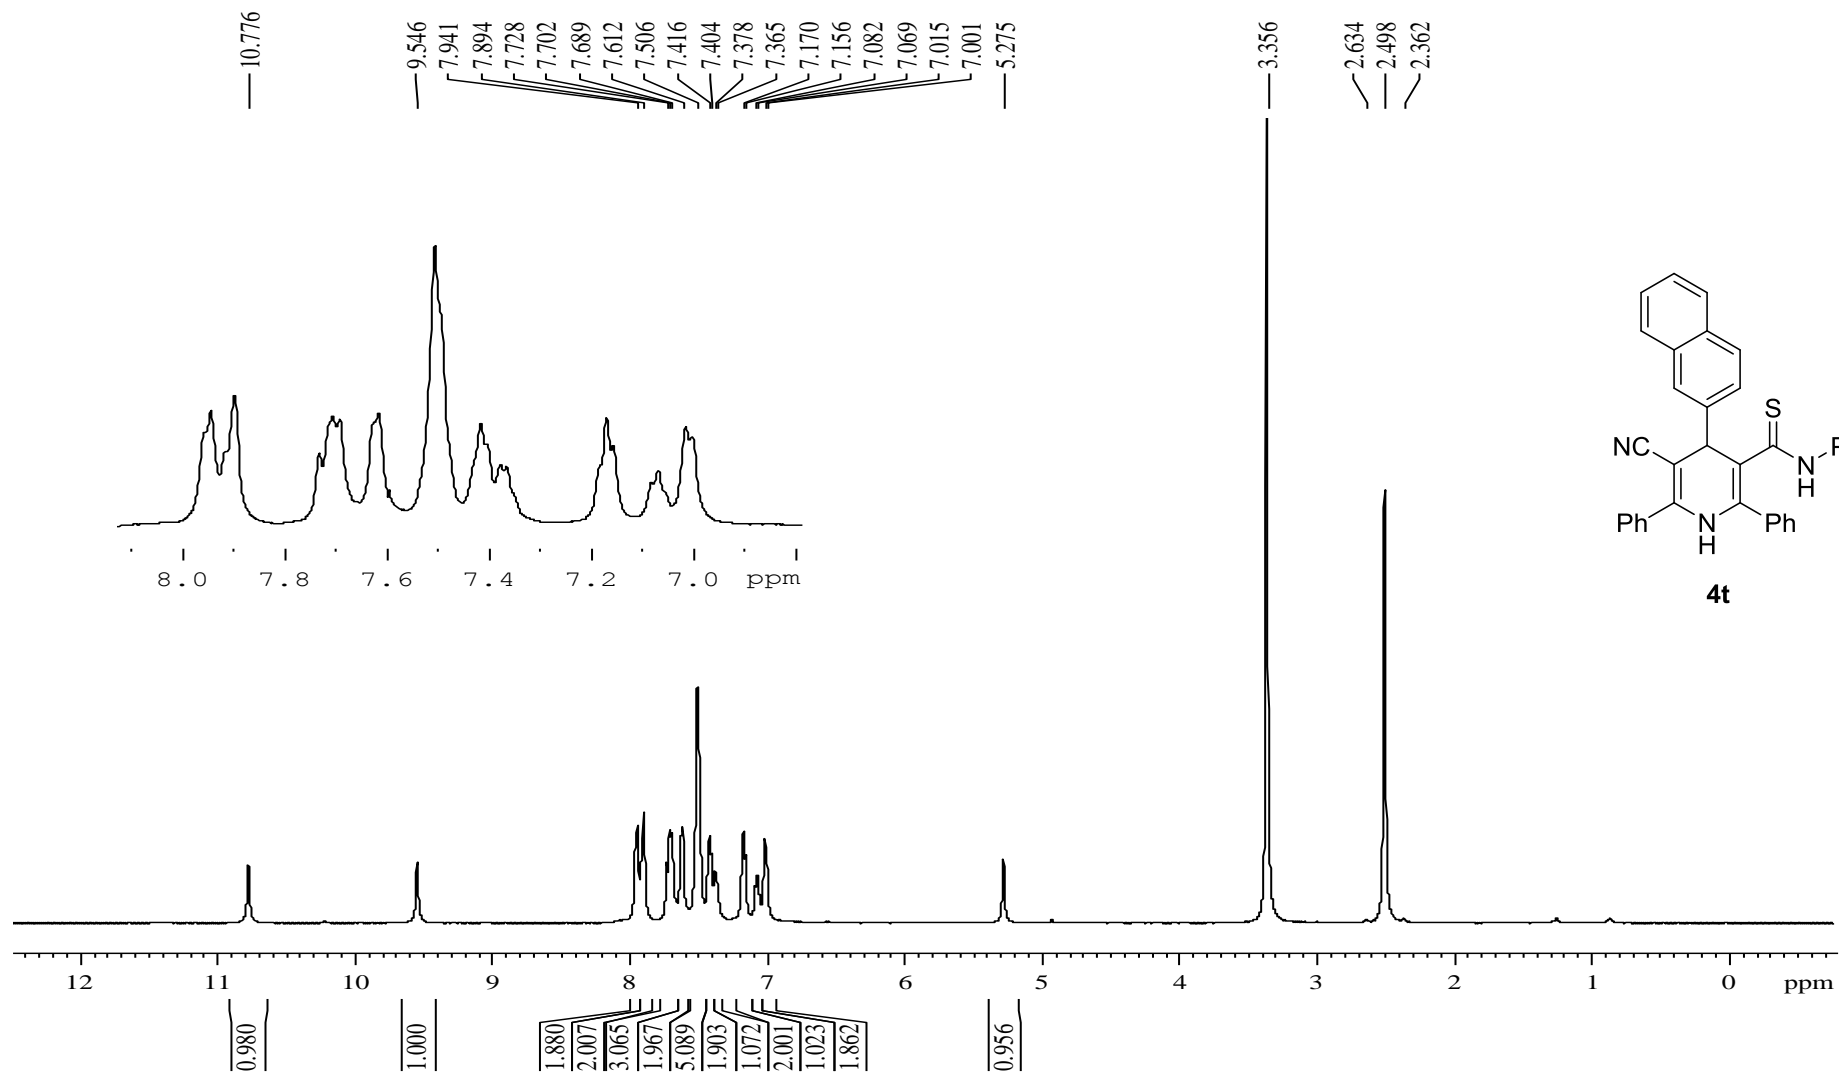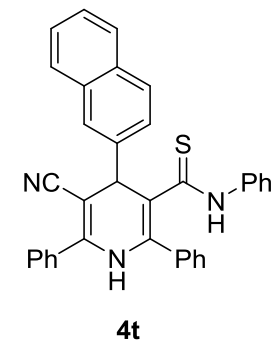

SKN-P-22 13C 2015 04 10

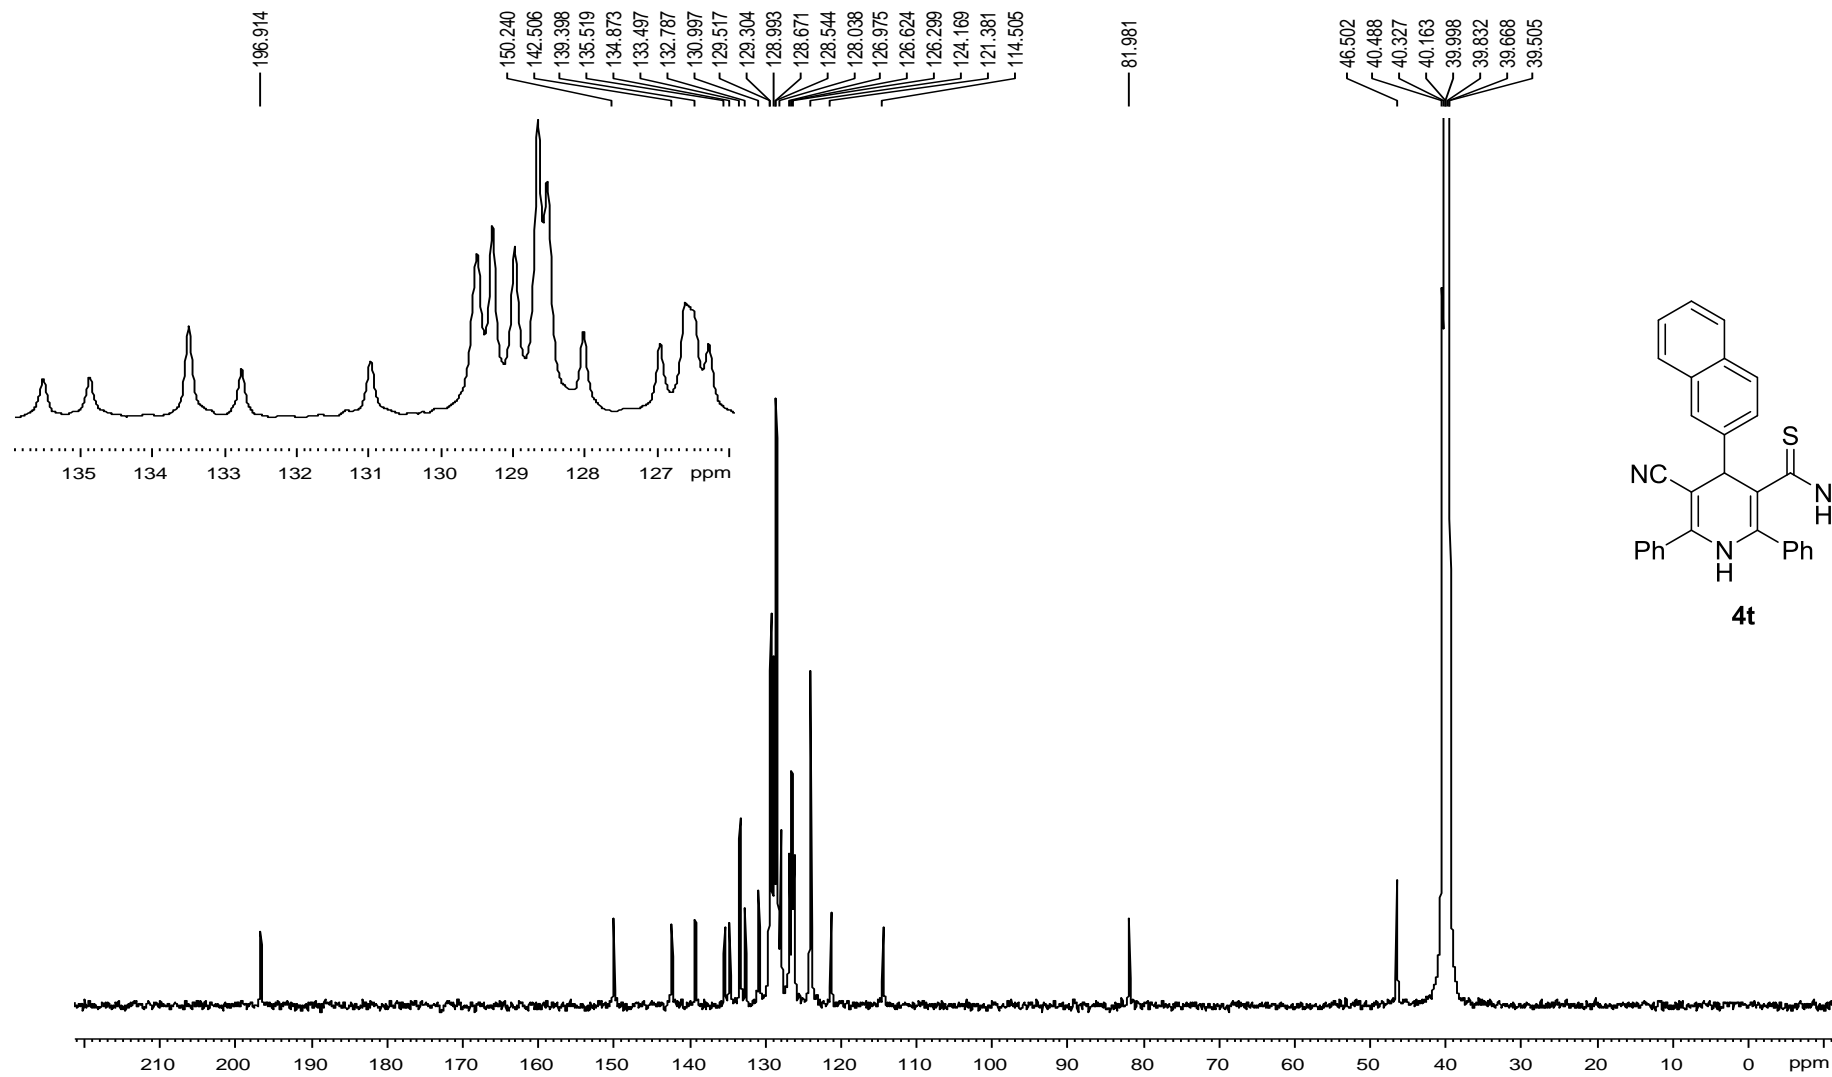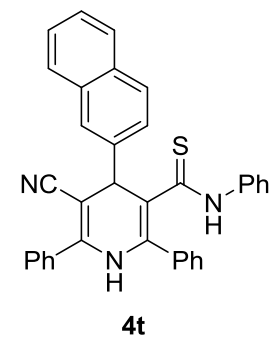

SKN-P-23a

1H 2015 04 16

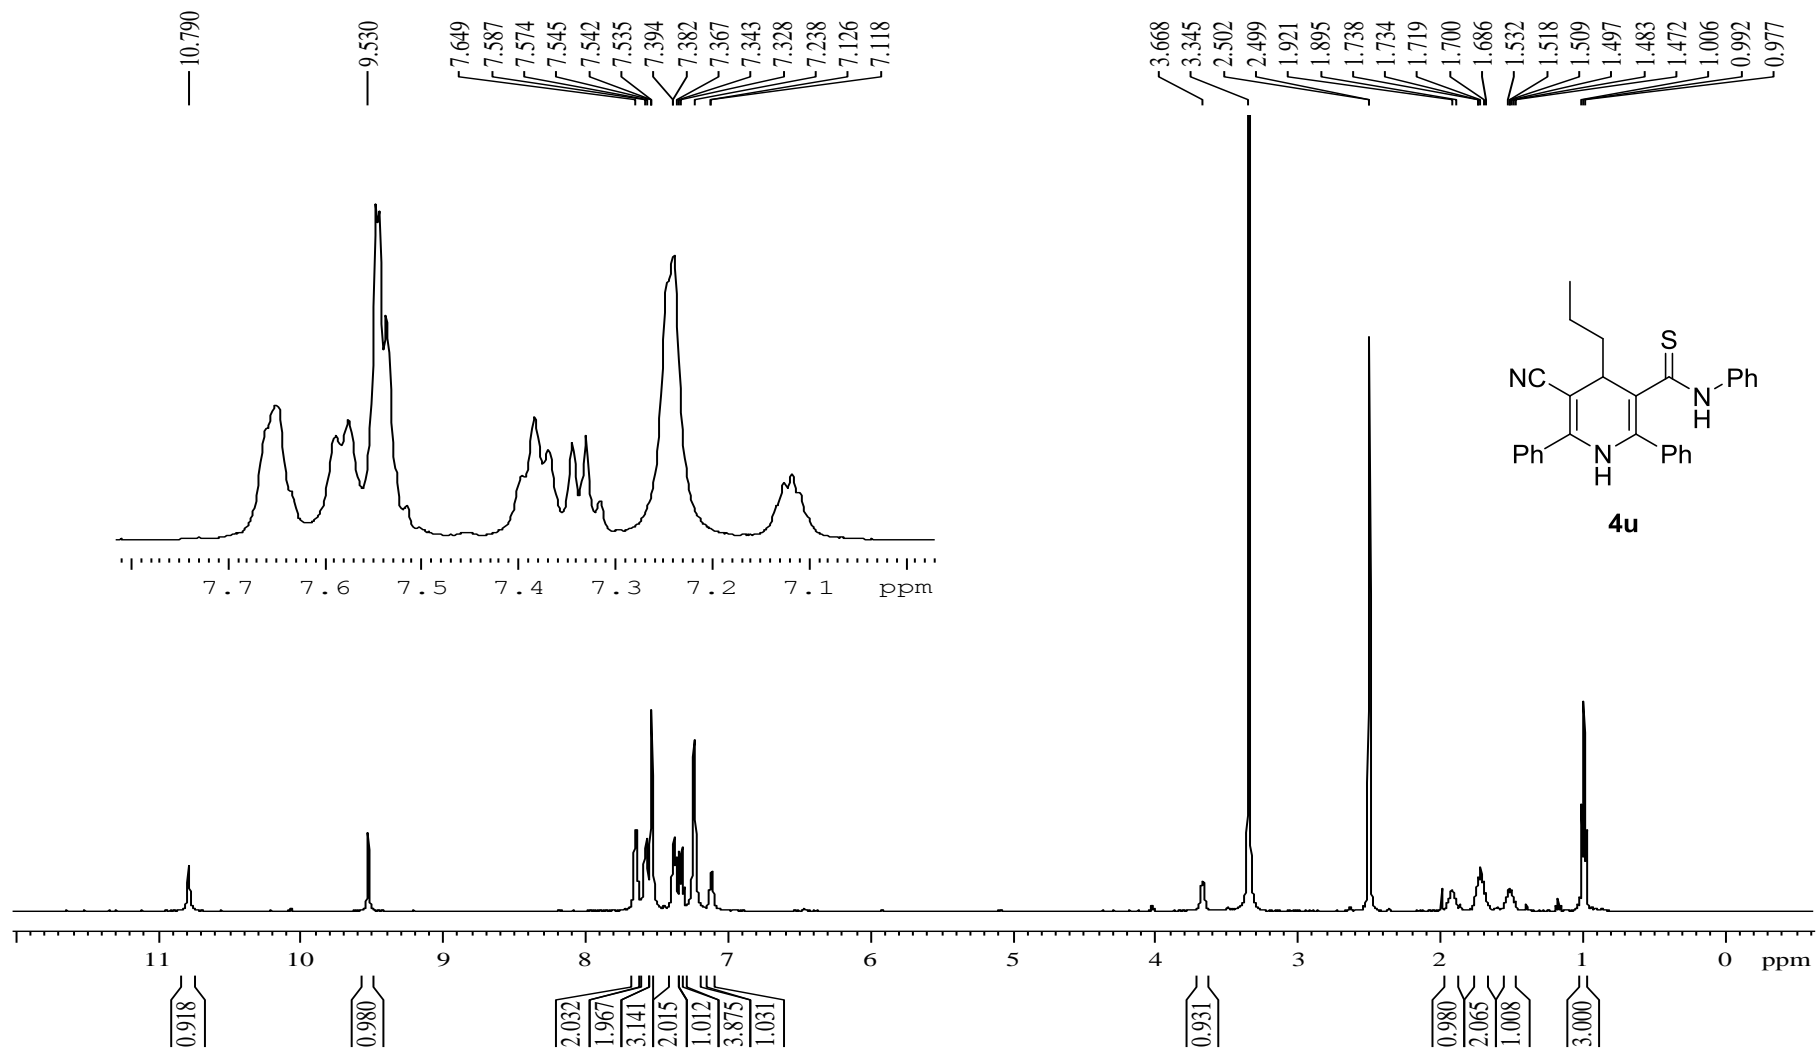

SKN-P-23a 13C 2015 04 17

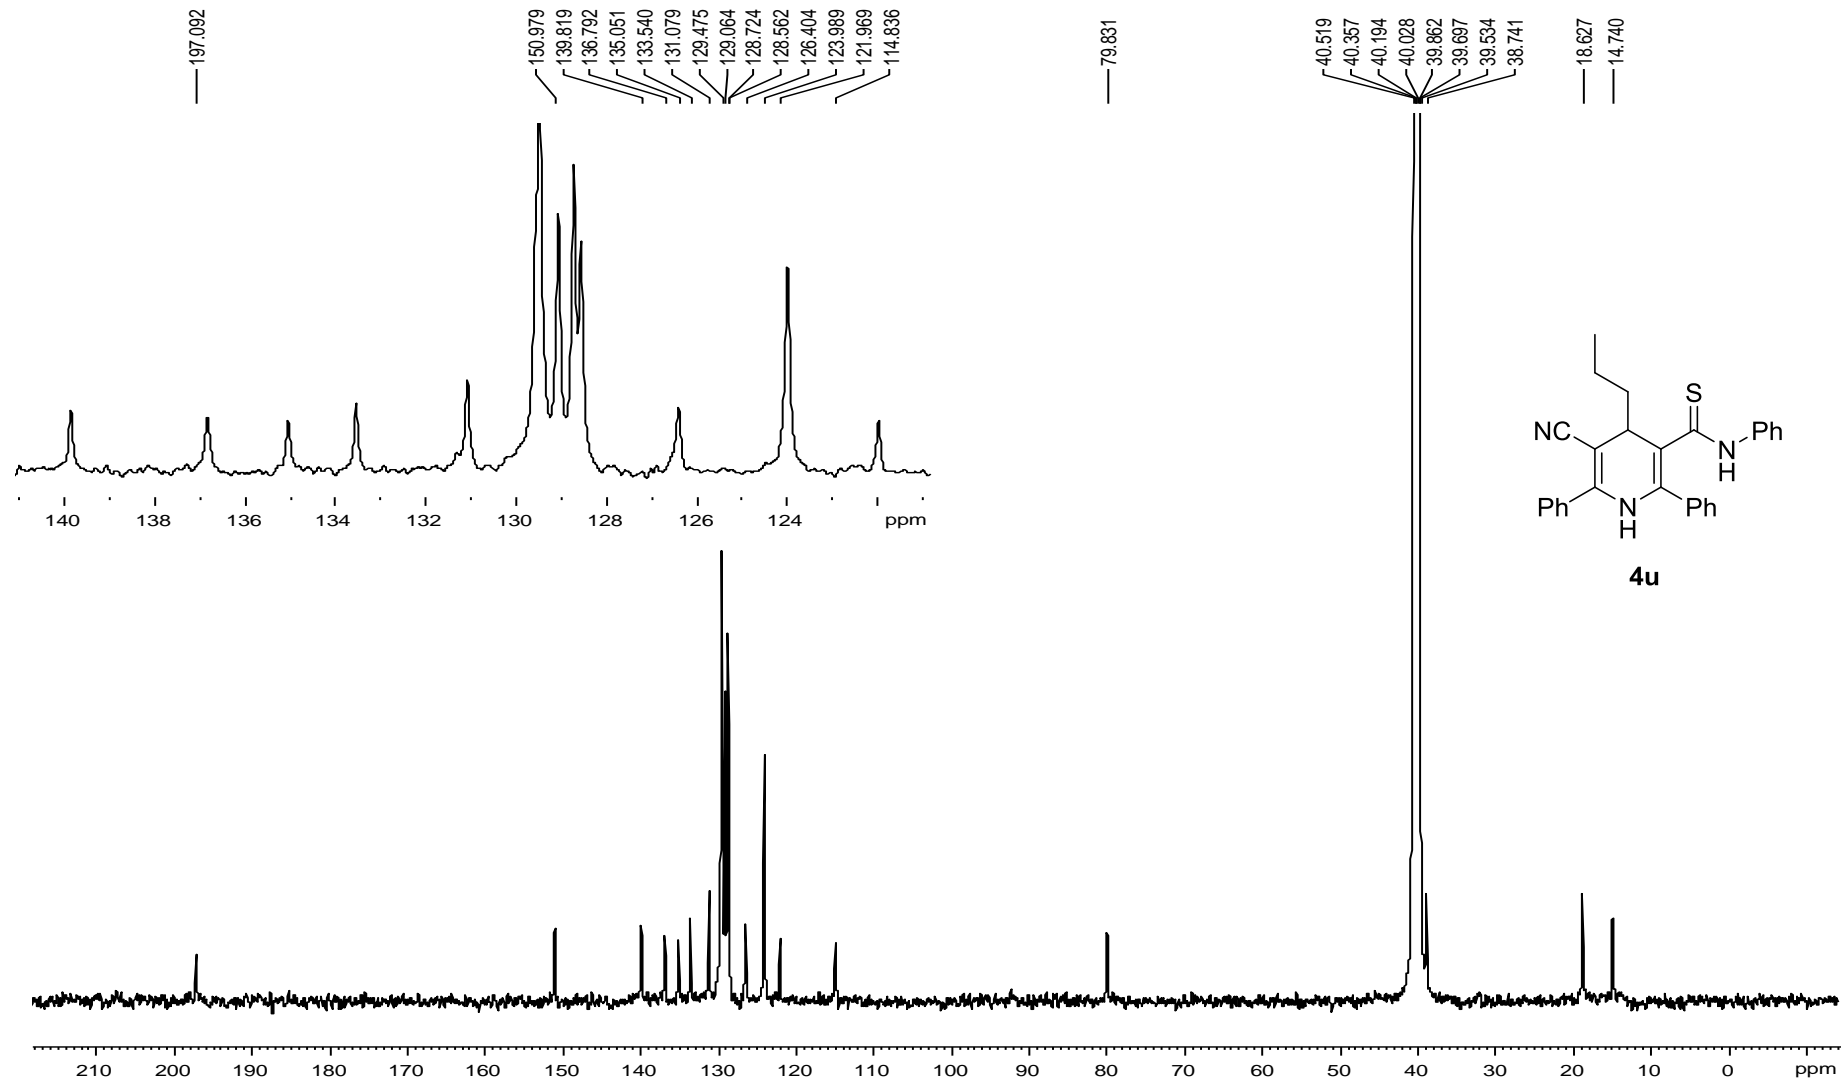

SKN-P-25

1H 2015 04 14

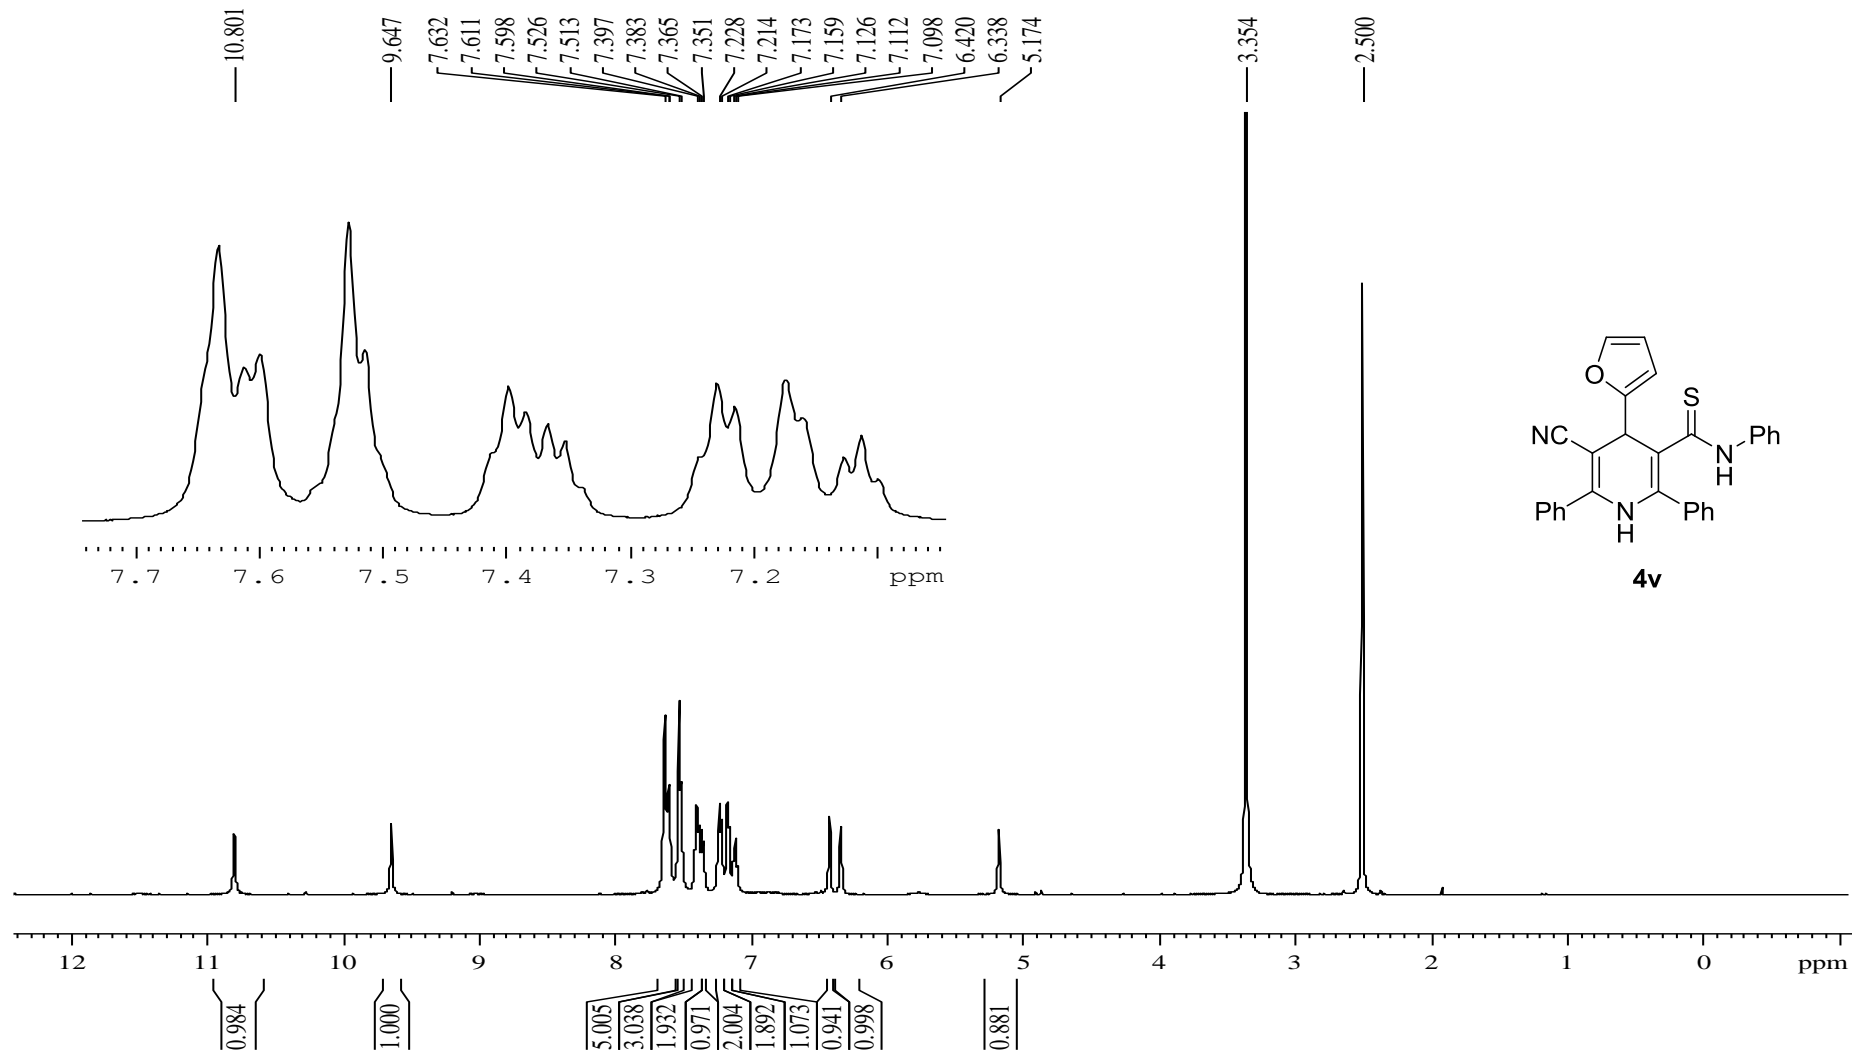

SKN-P-25 13C 2015 04 17

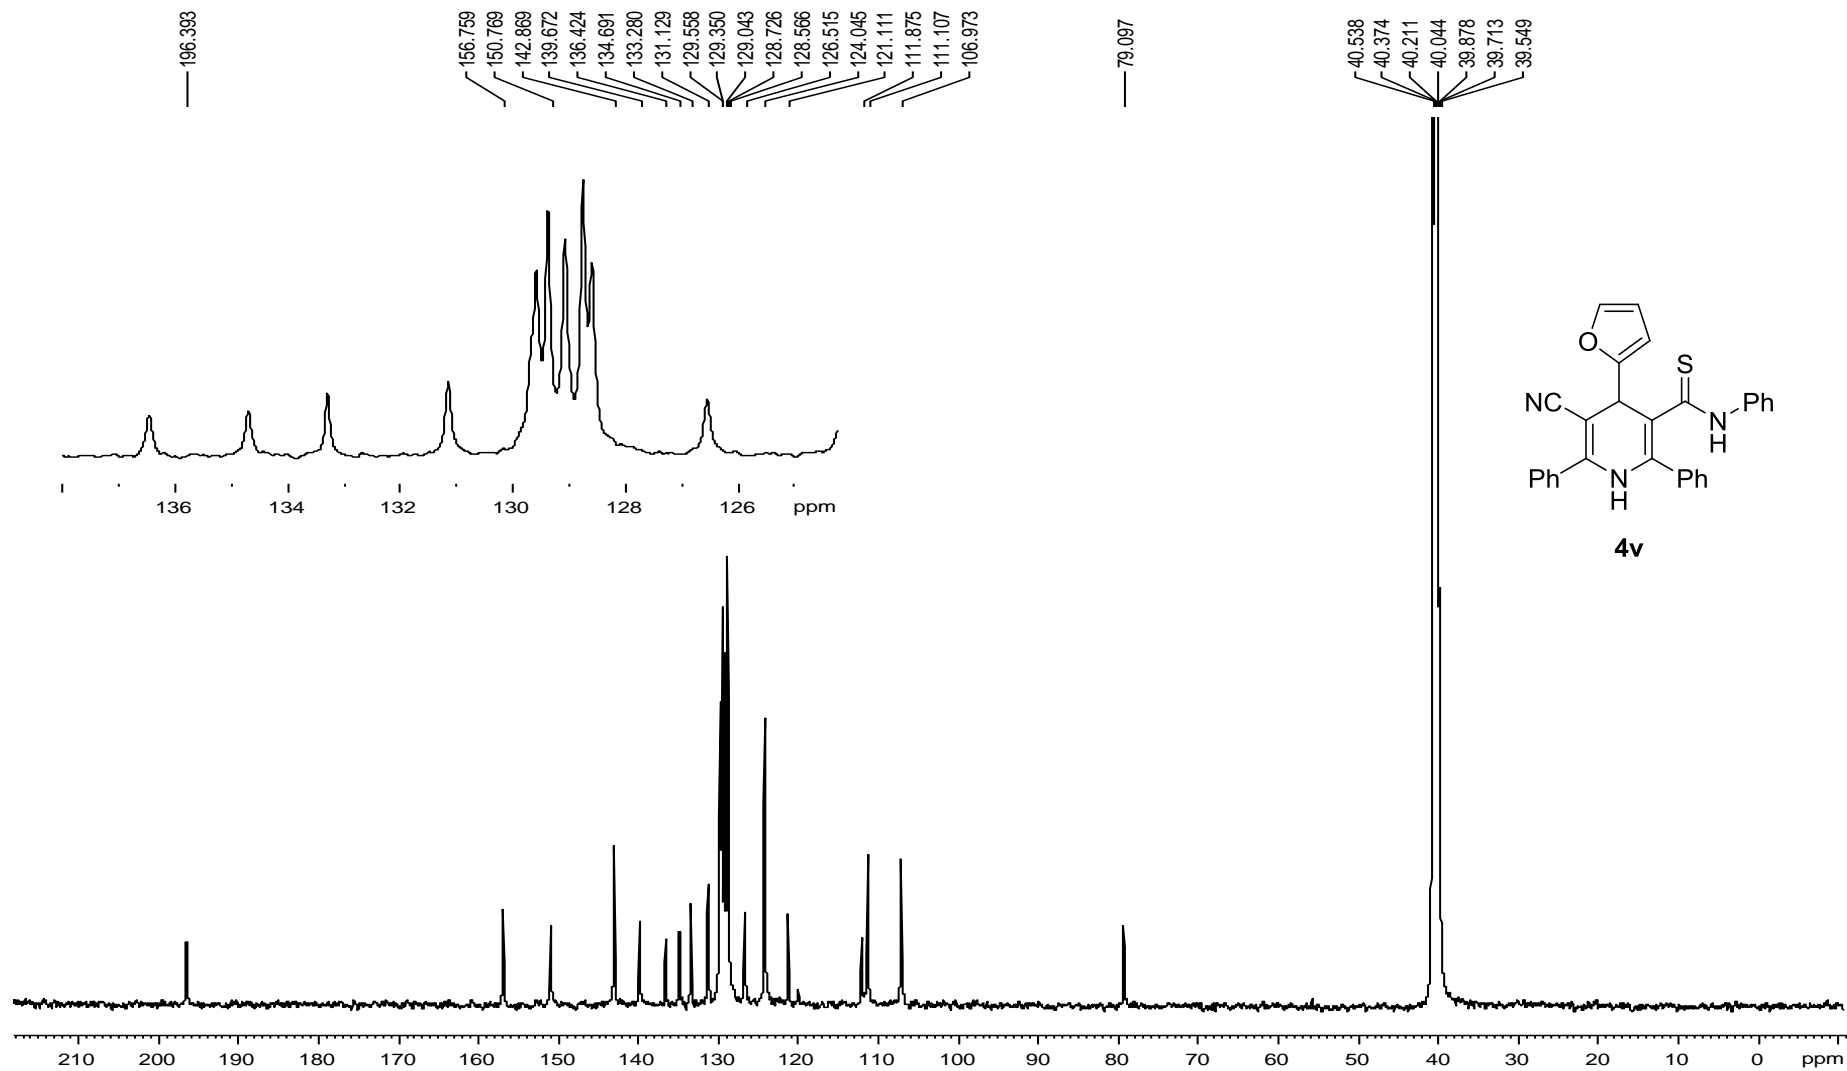

SKN-P-19

1H

2015 04 01

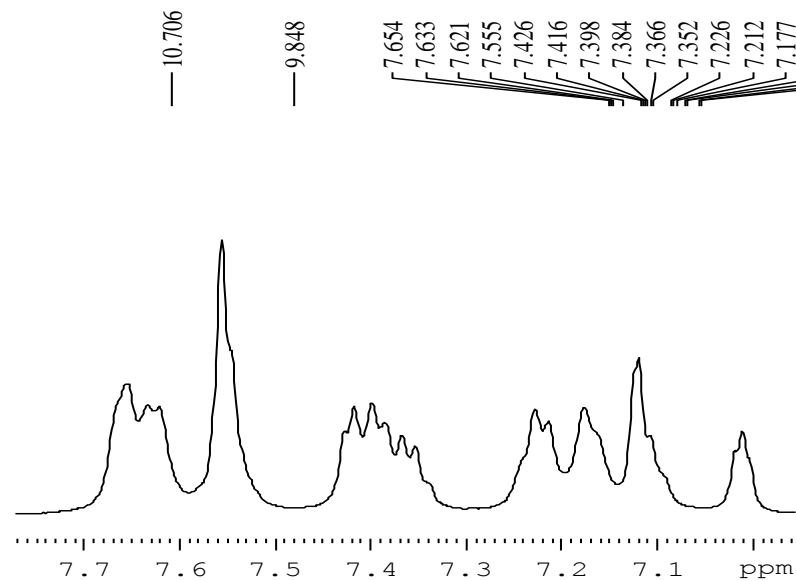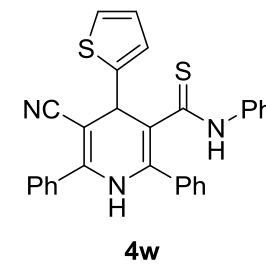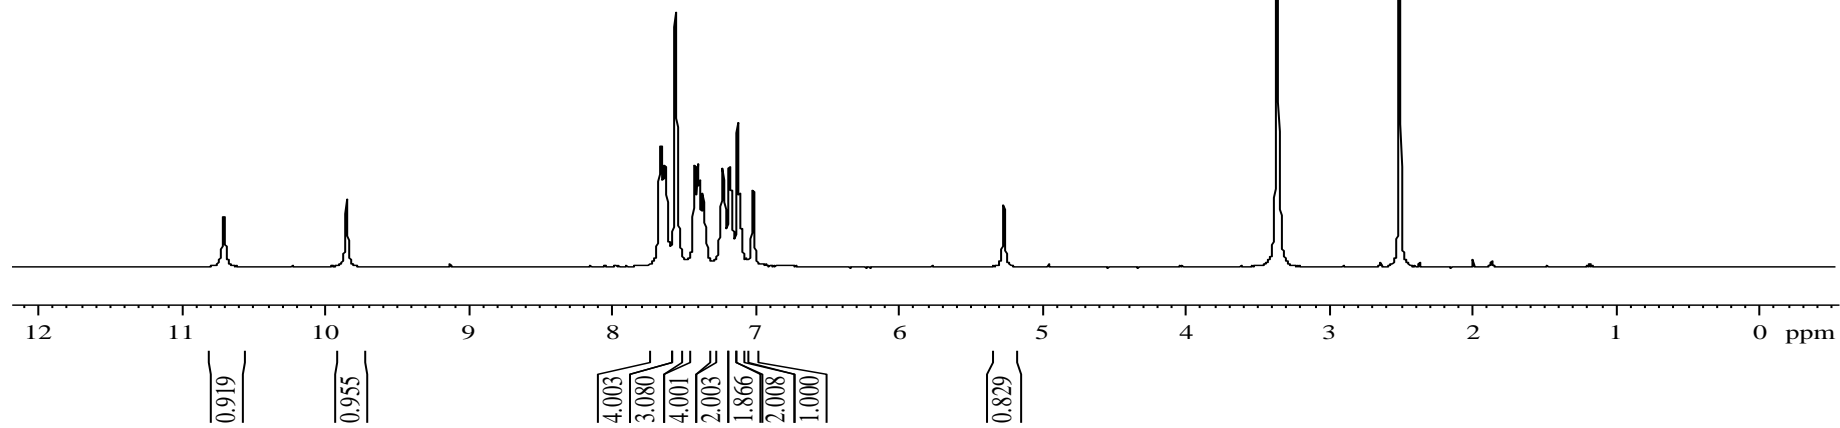



— SKN-P-19 13C 2015 04 03

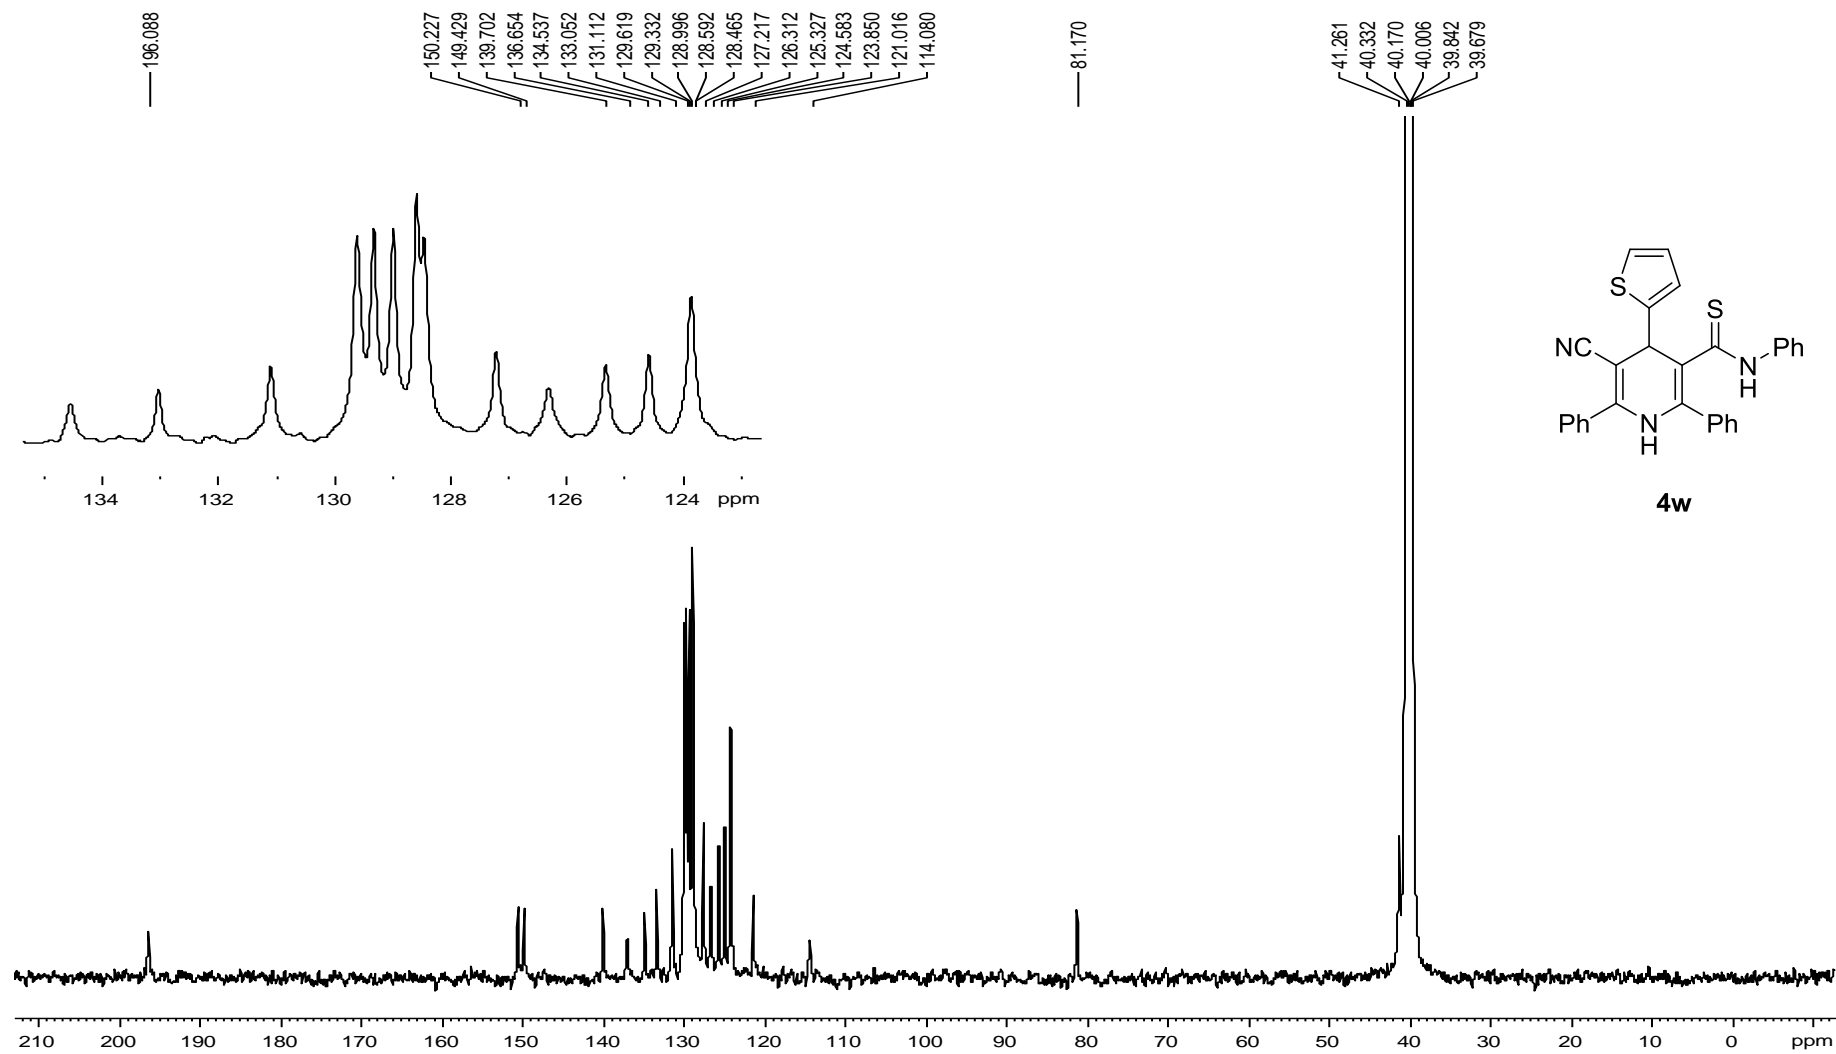

SKN-P-9

1H 2015 04 16

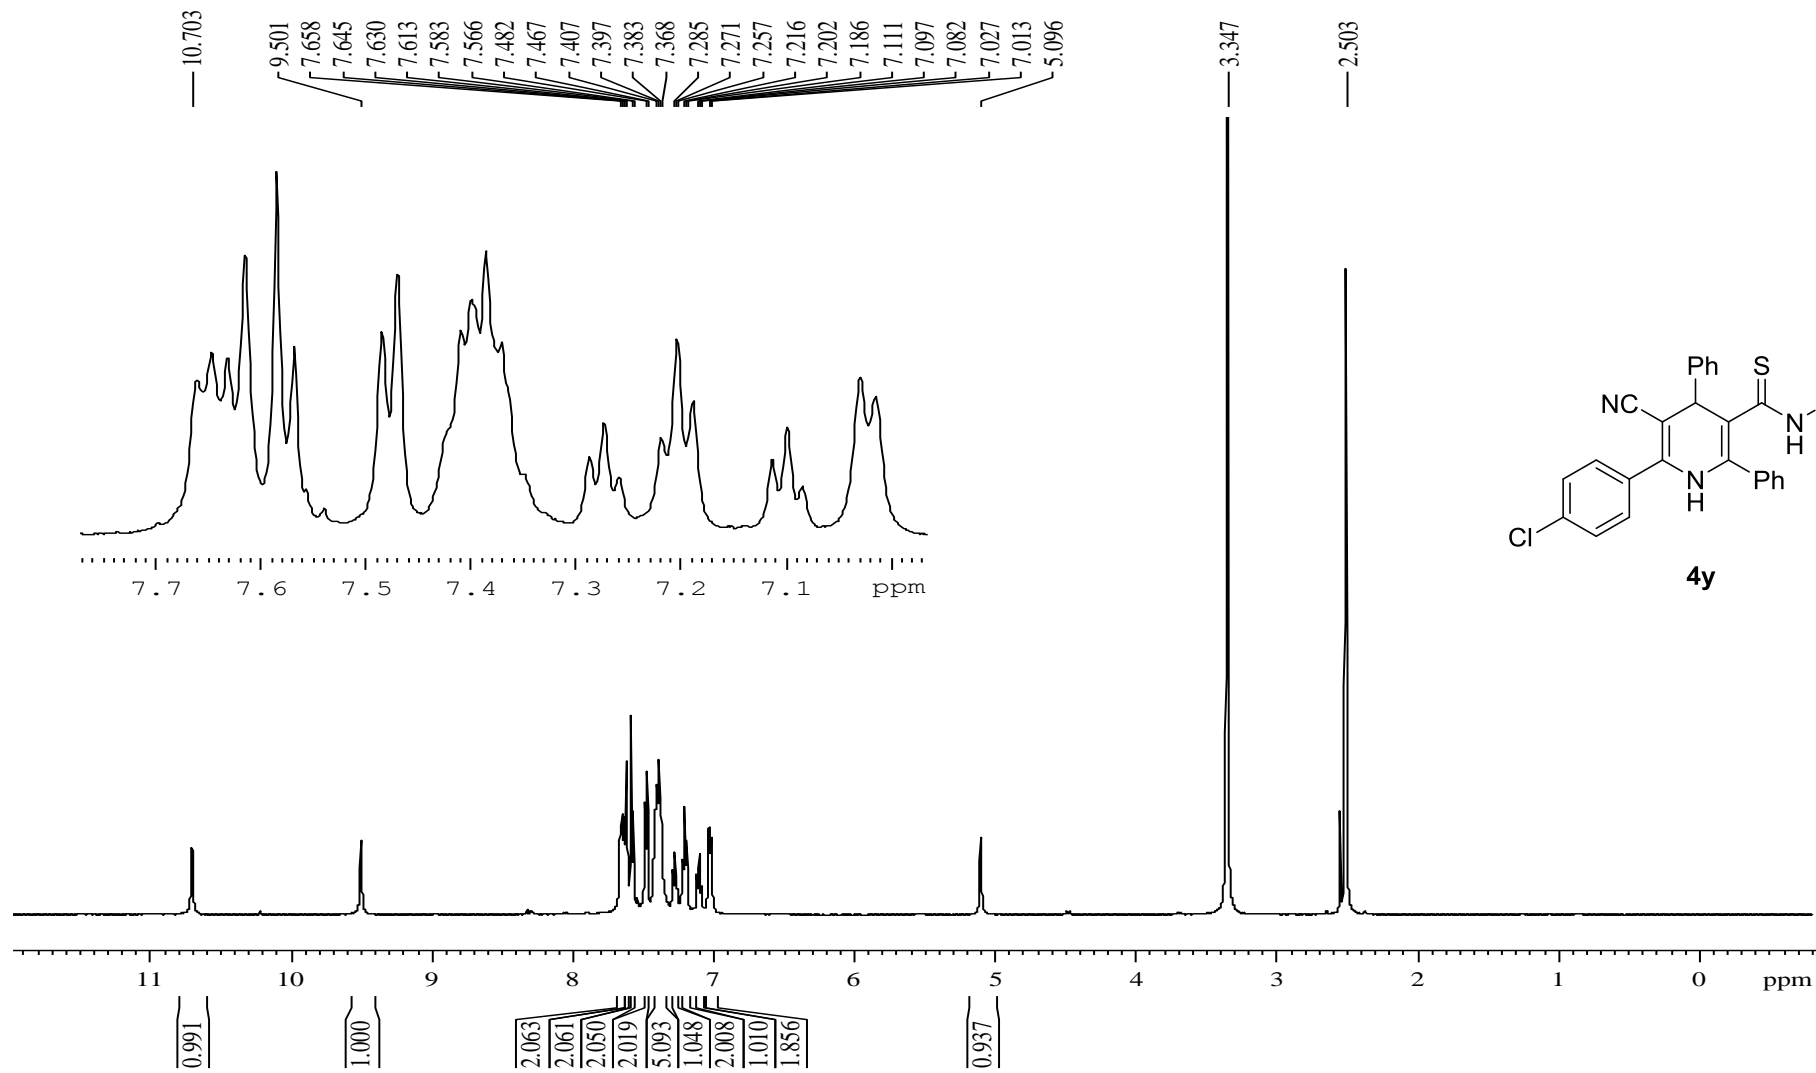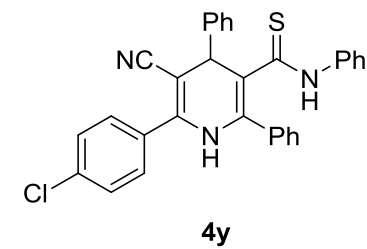

— SKN-P-9

13C 2015 04 19

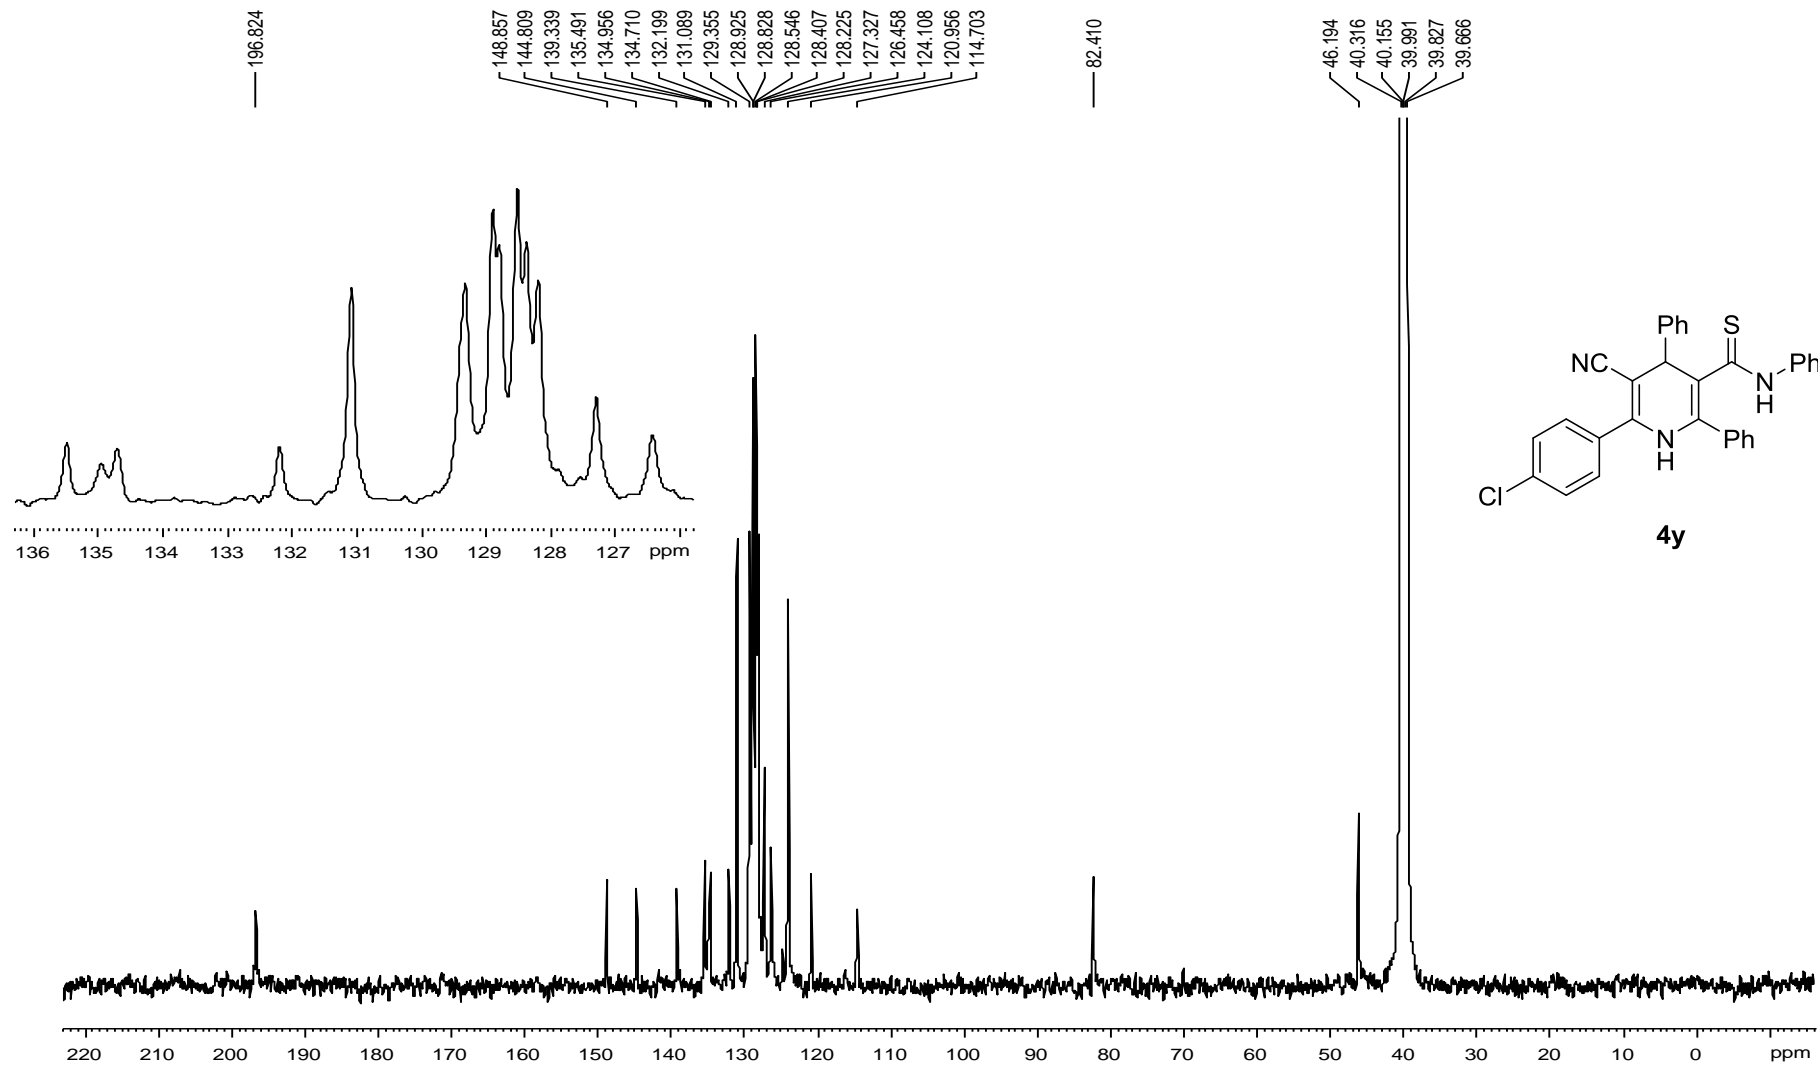

SKN-P-26 1H 2015 04 27

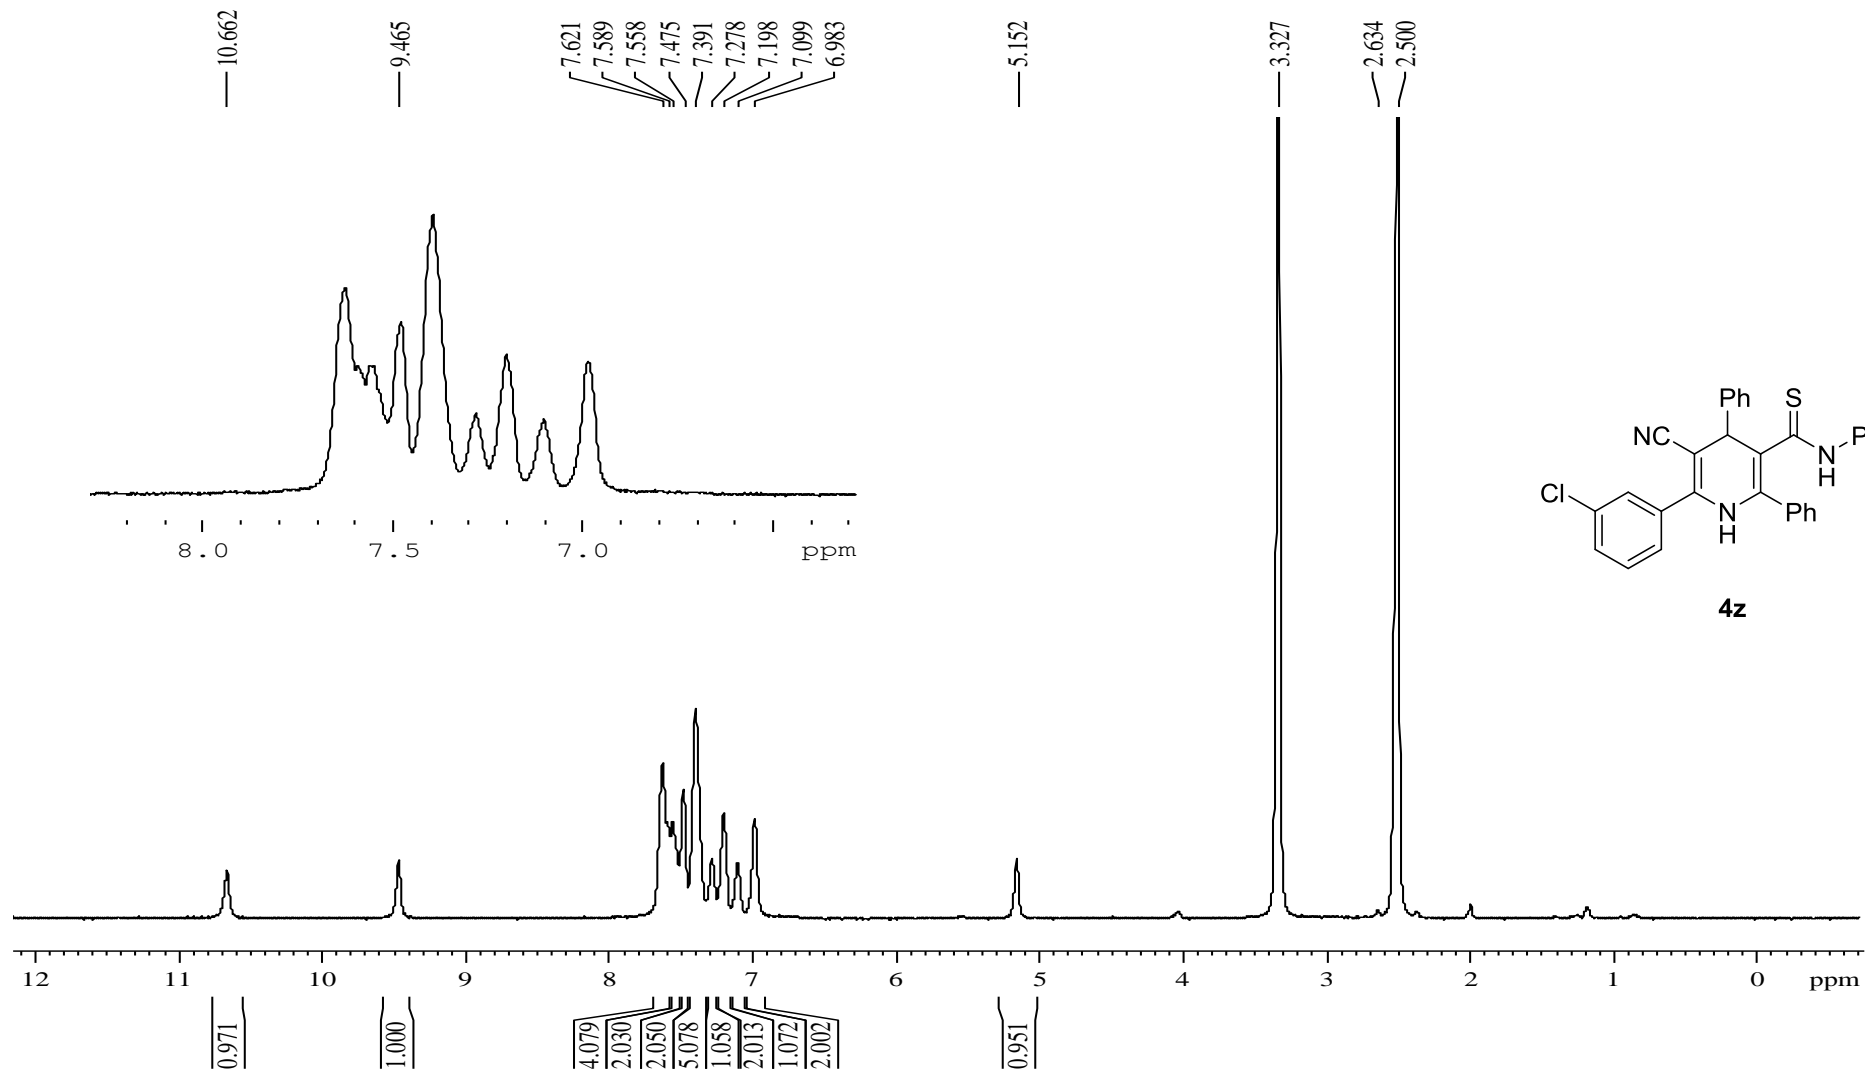

SKN-P-26 13C 2015 04 28

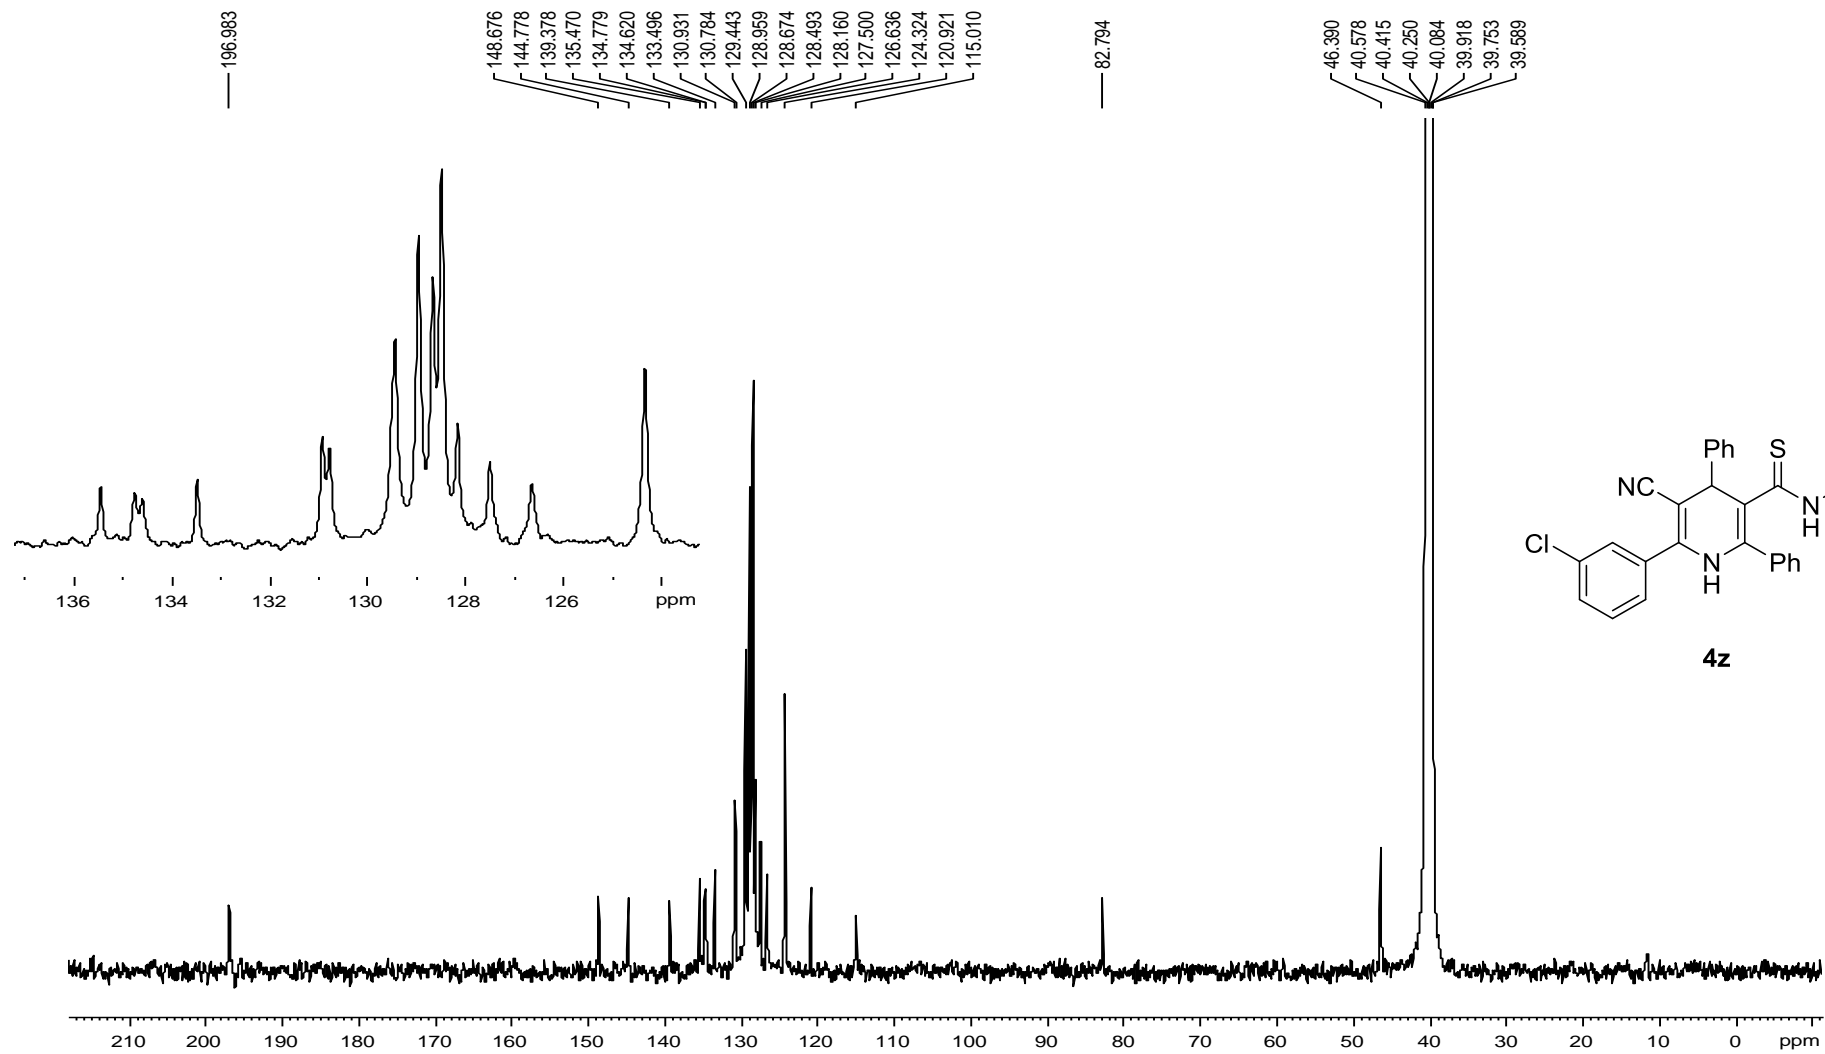

SKN-P-116

1H

2015 04 24

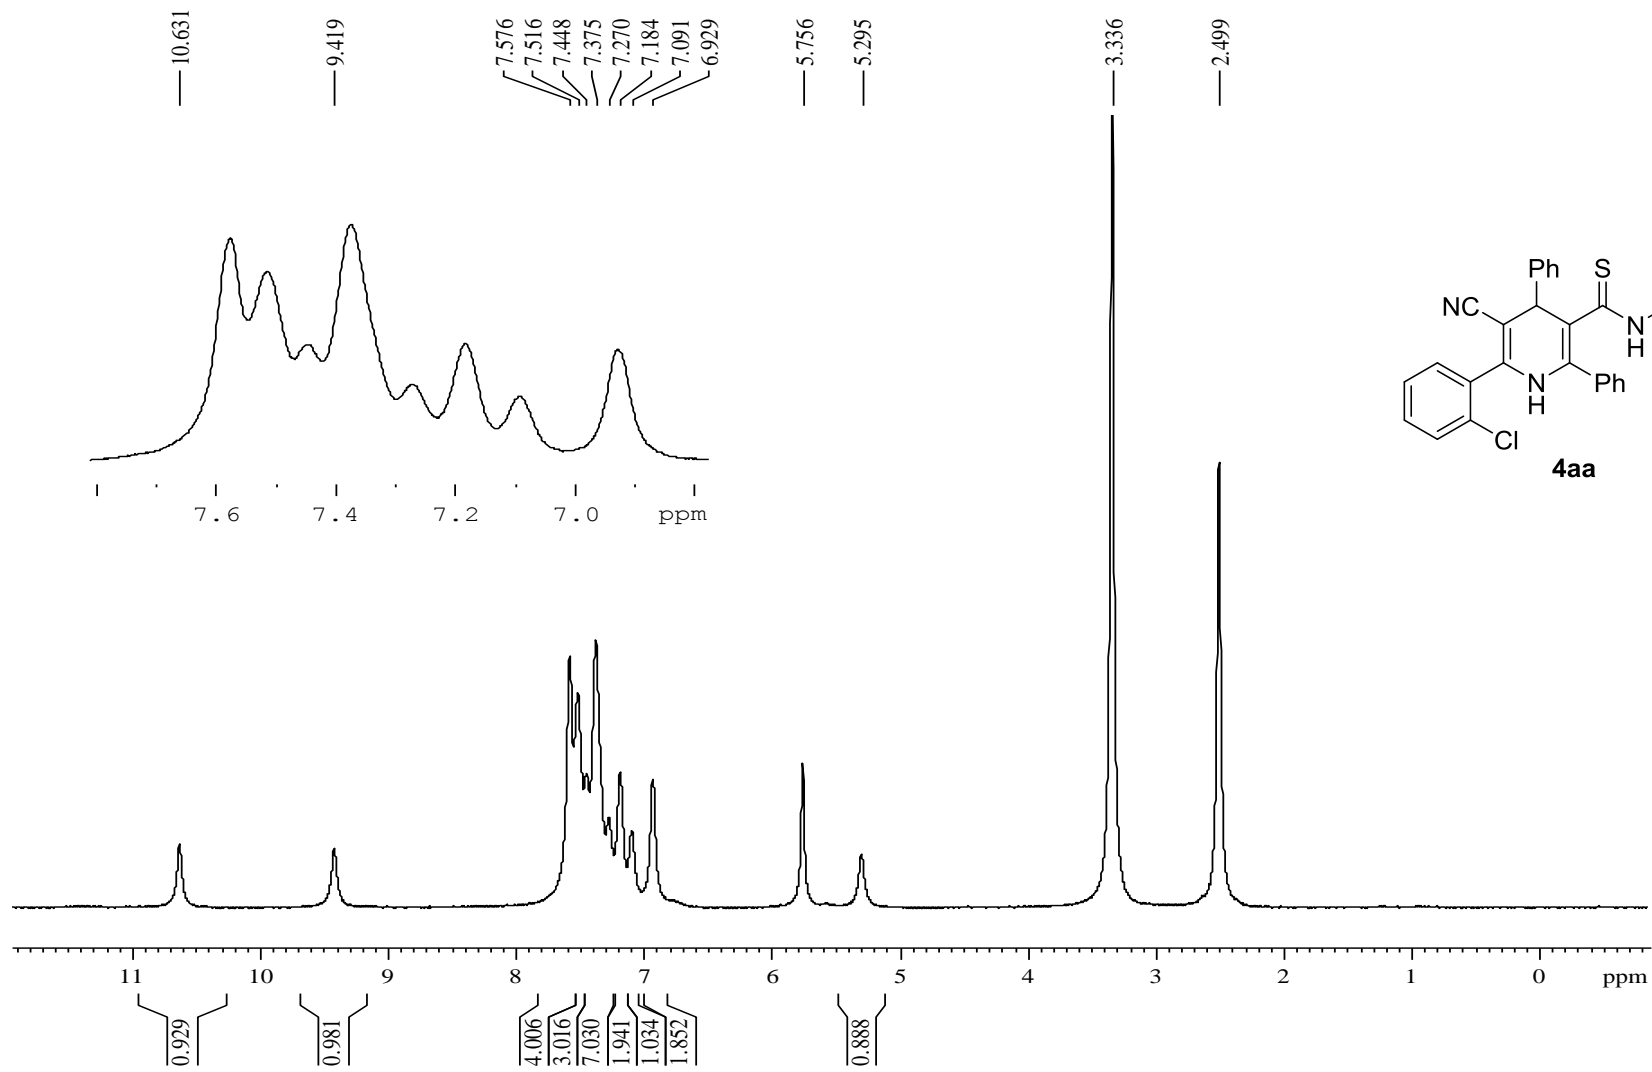

SKN-P-11b 13C 2015 04 27

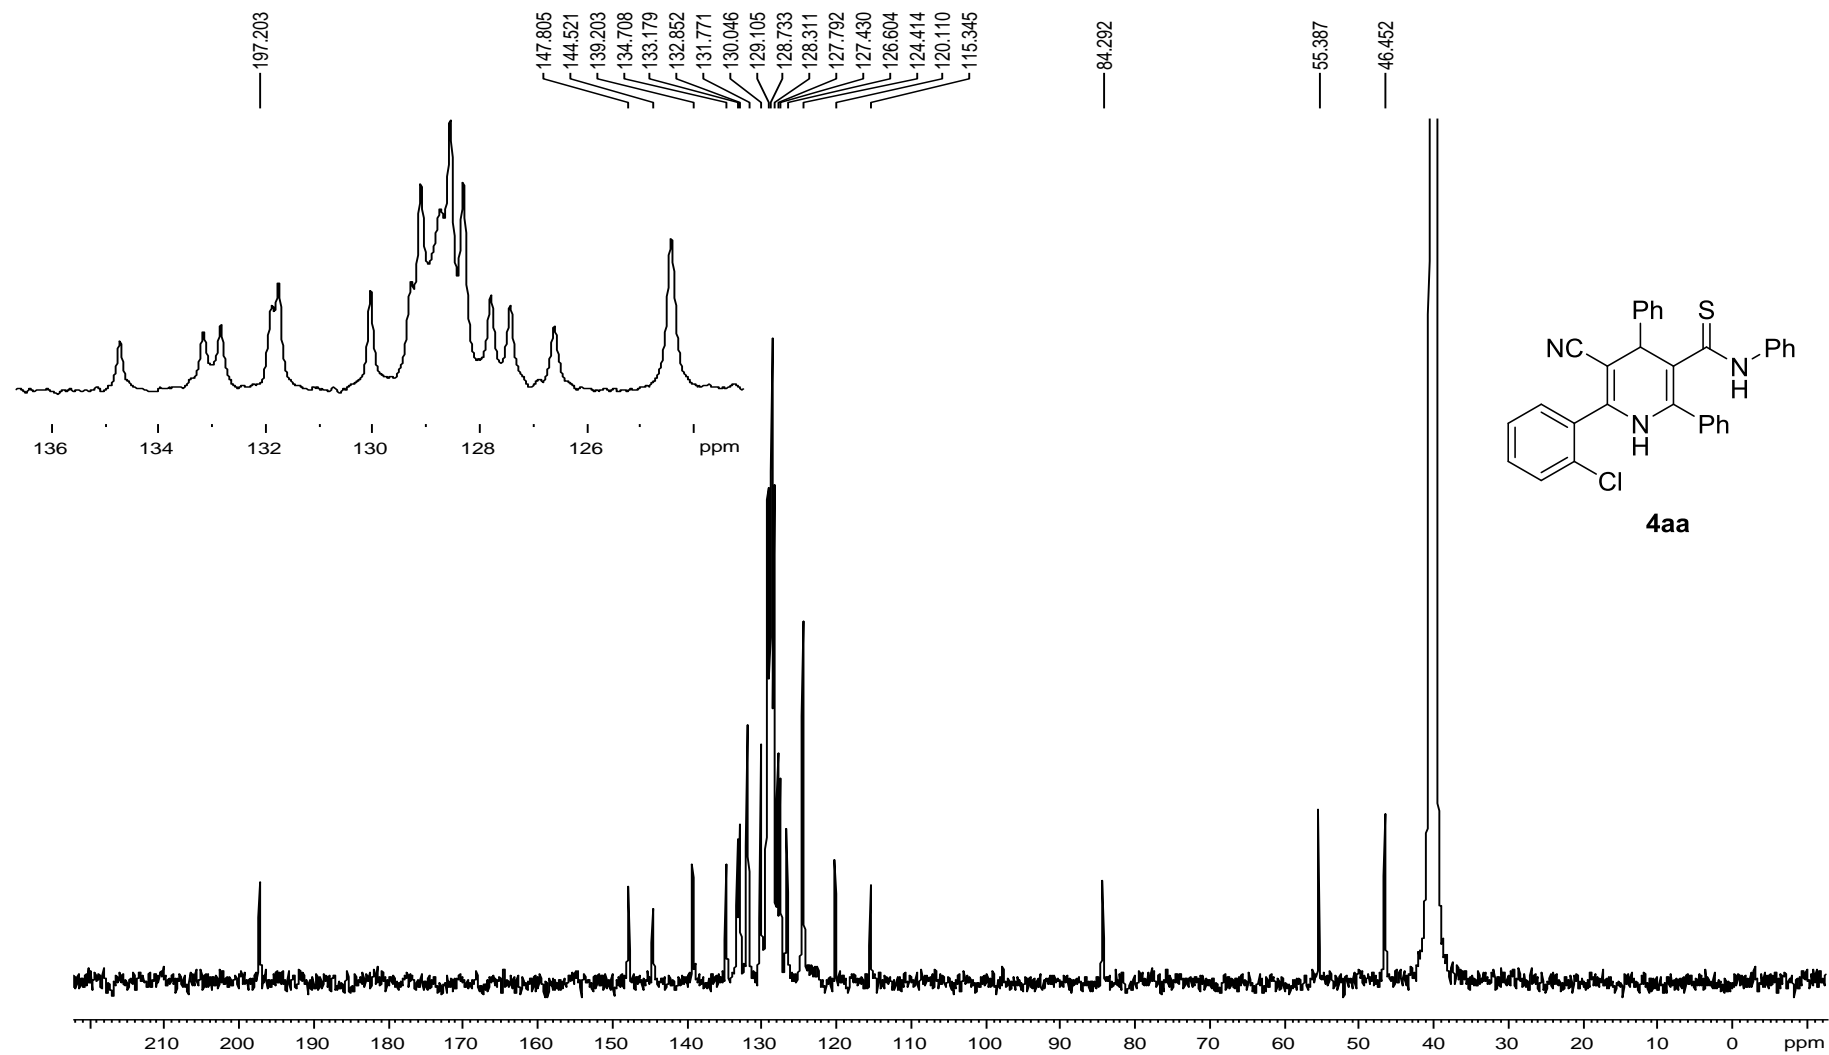

SKN-P-27

1H 2015 04 13

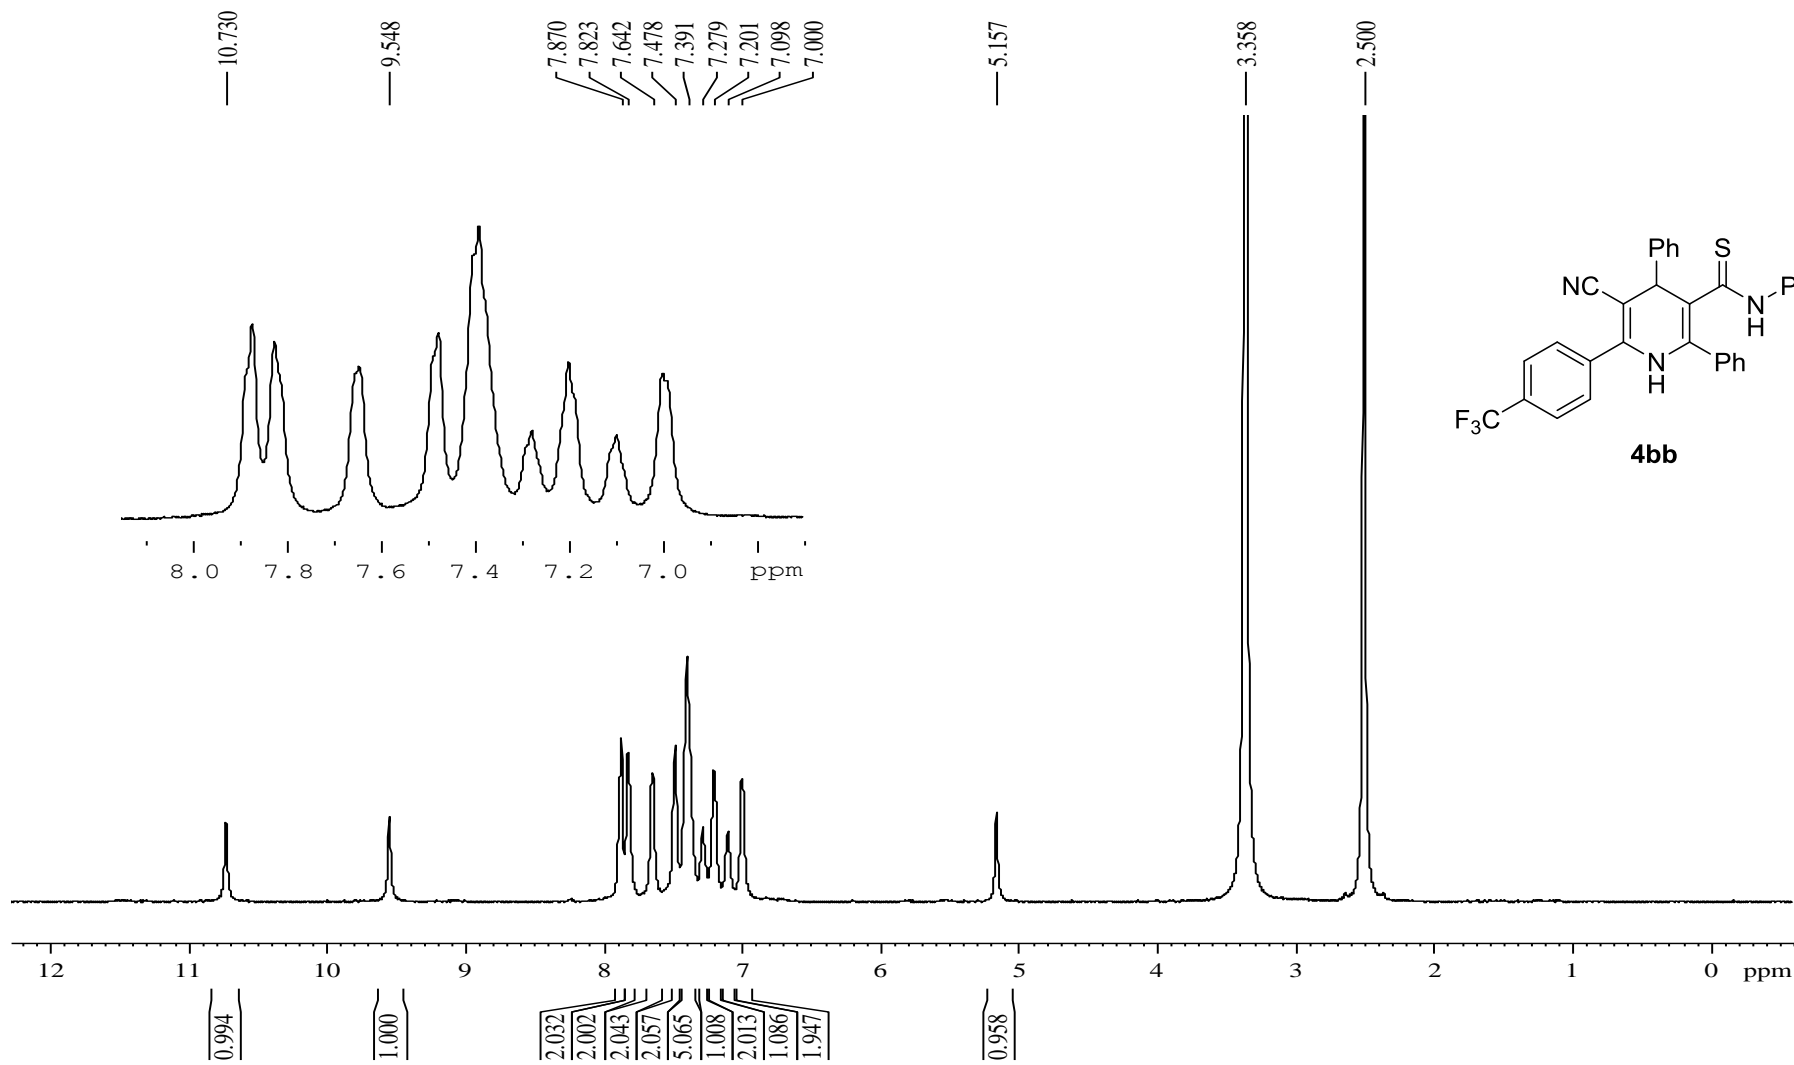



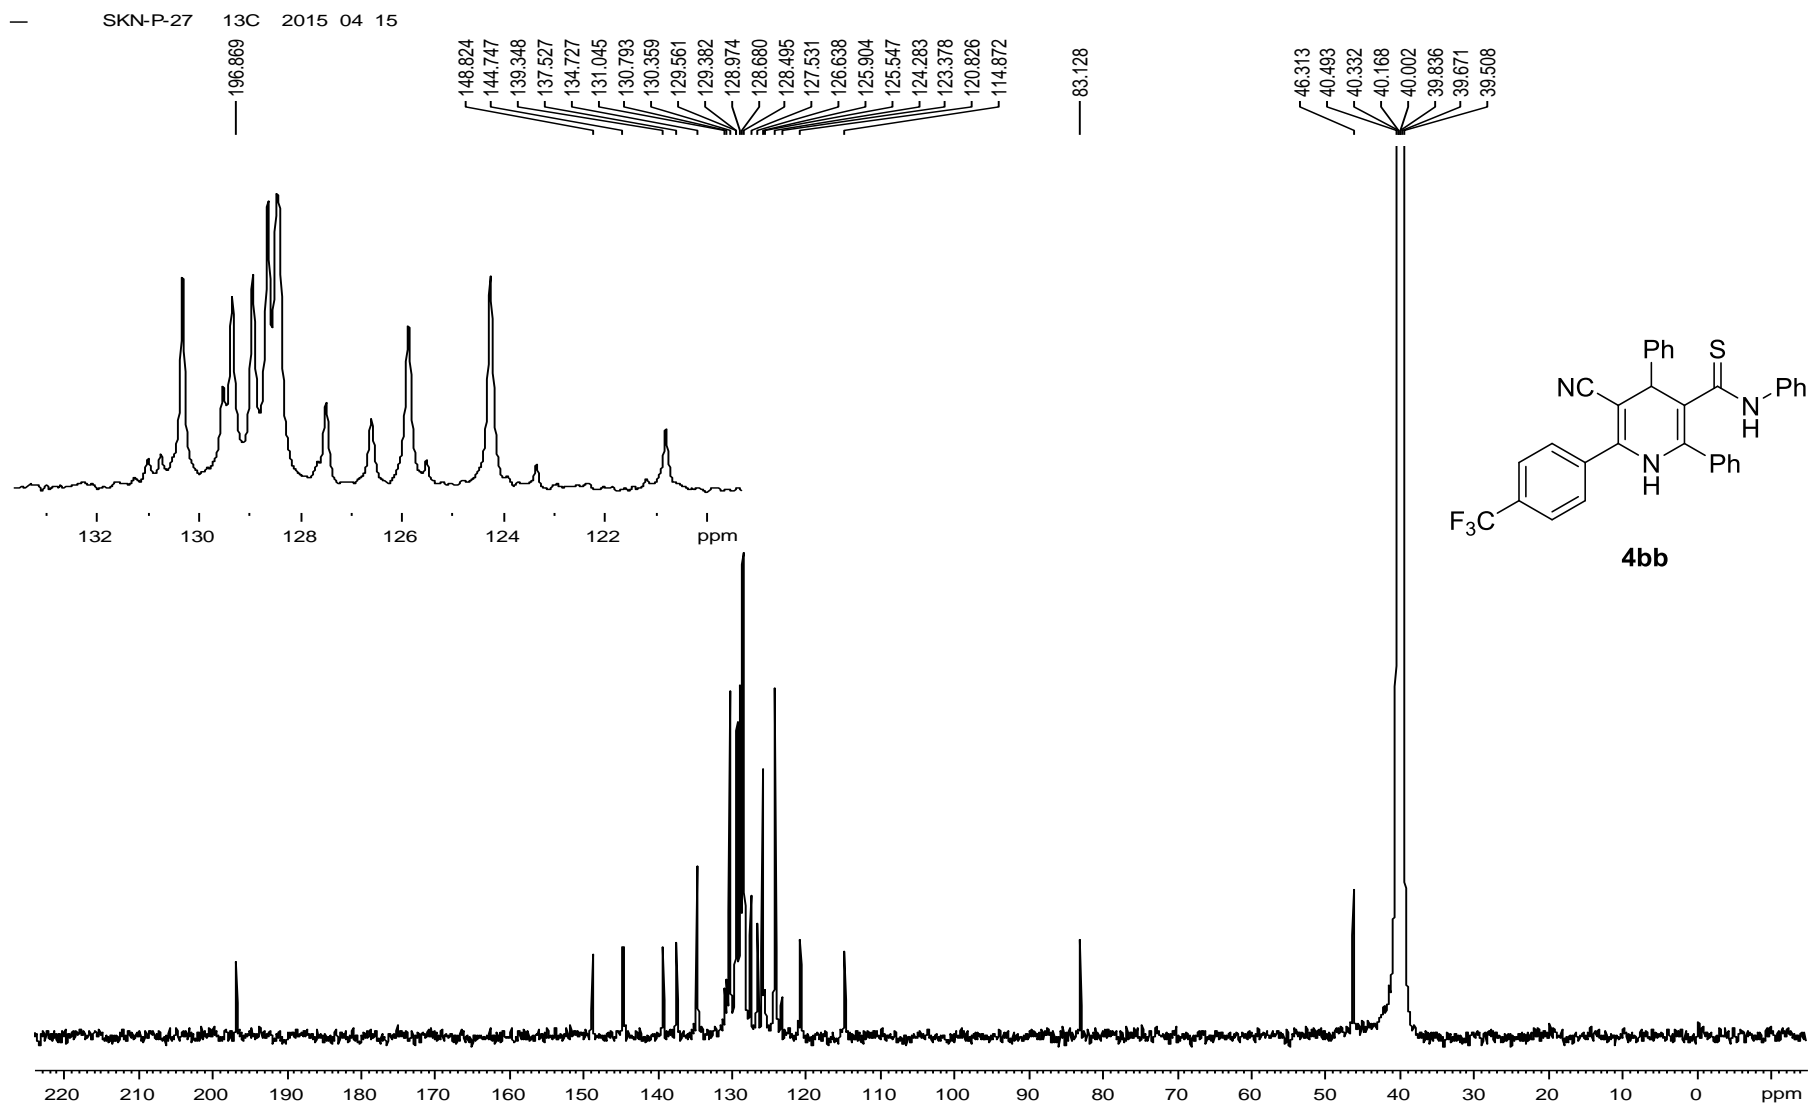

SKN-P-28

1H 2015 04 10

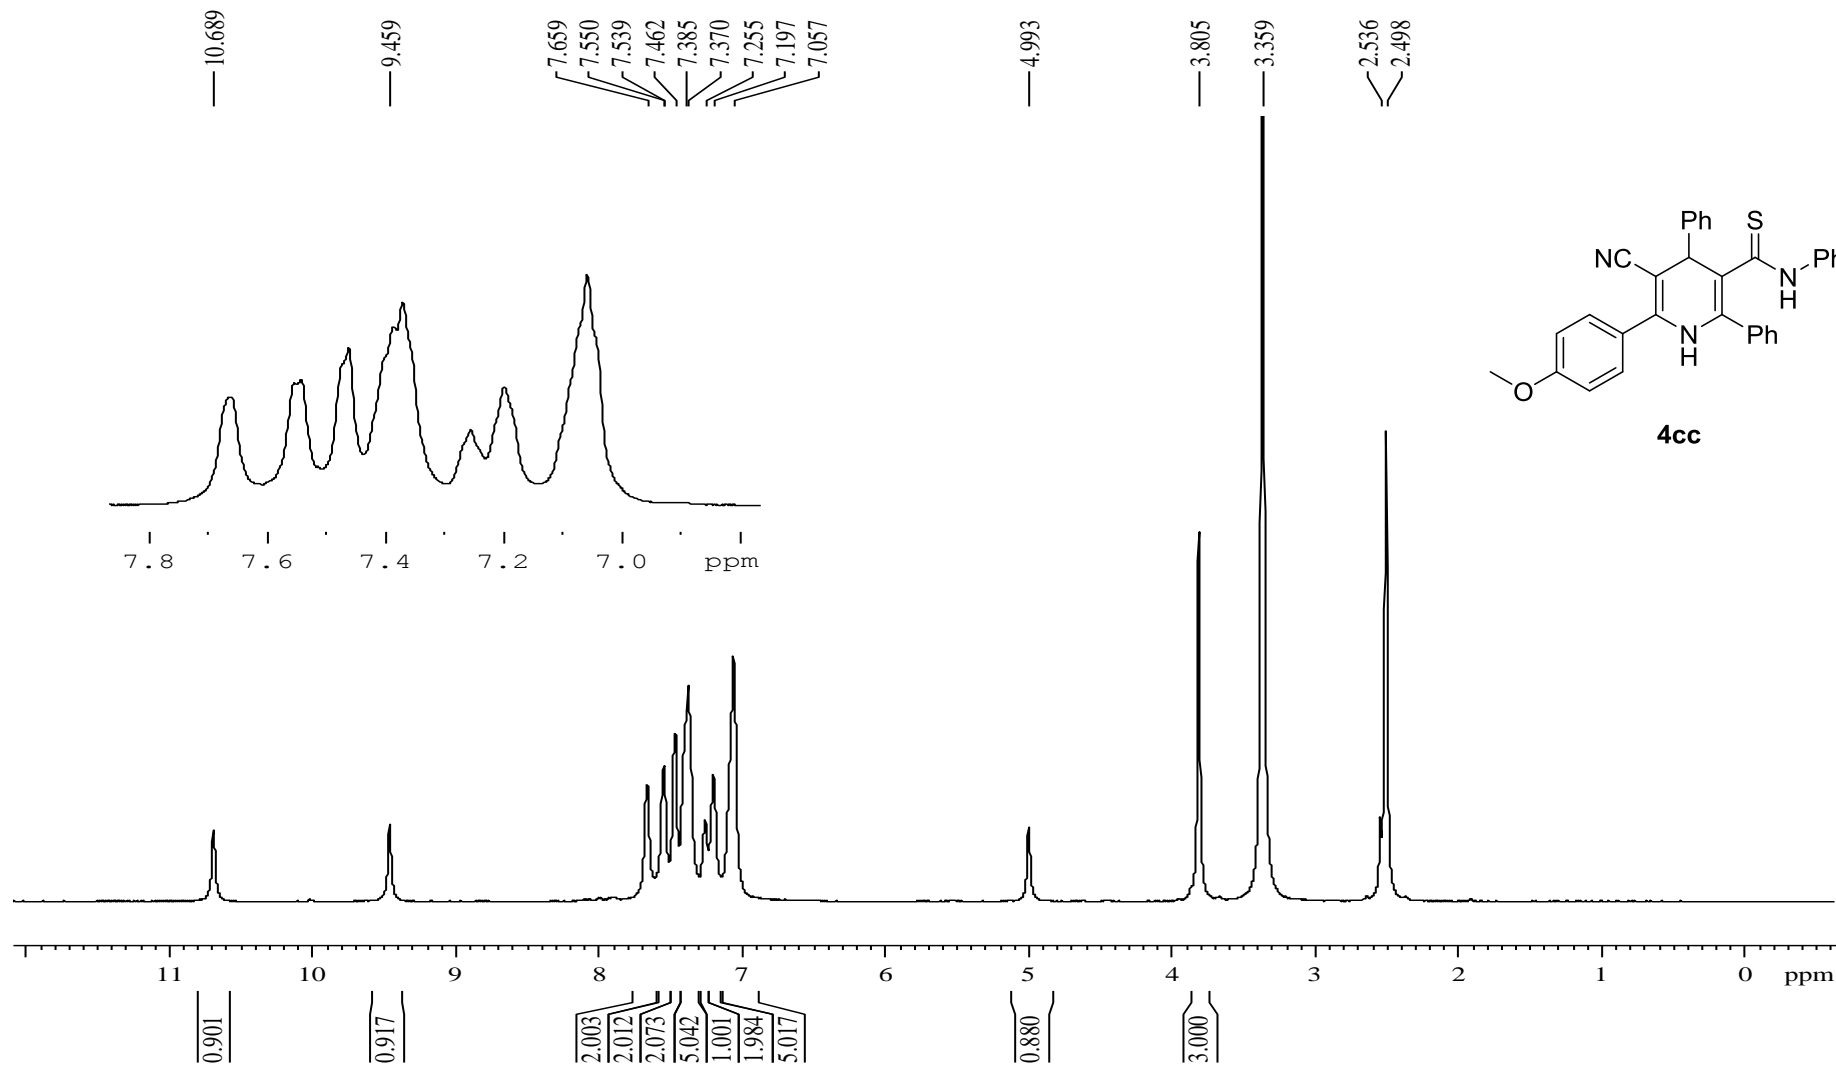

SKN-P-28 13C 2015 04 13

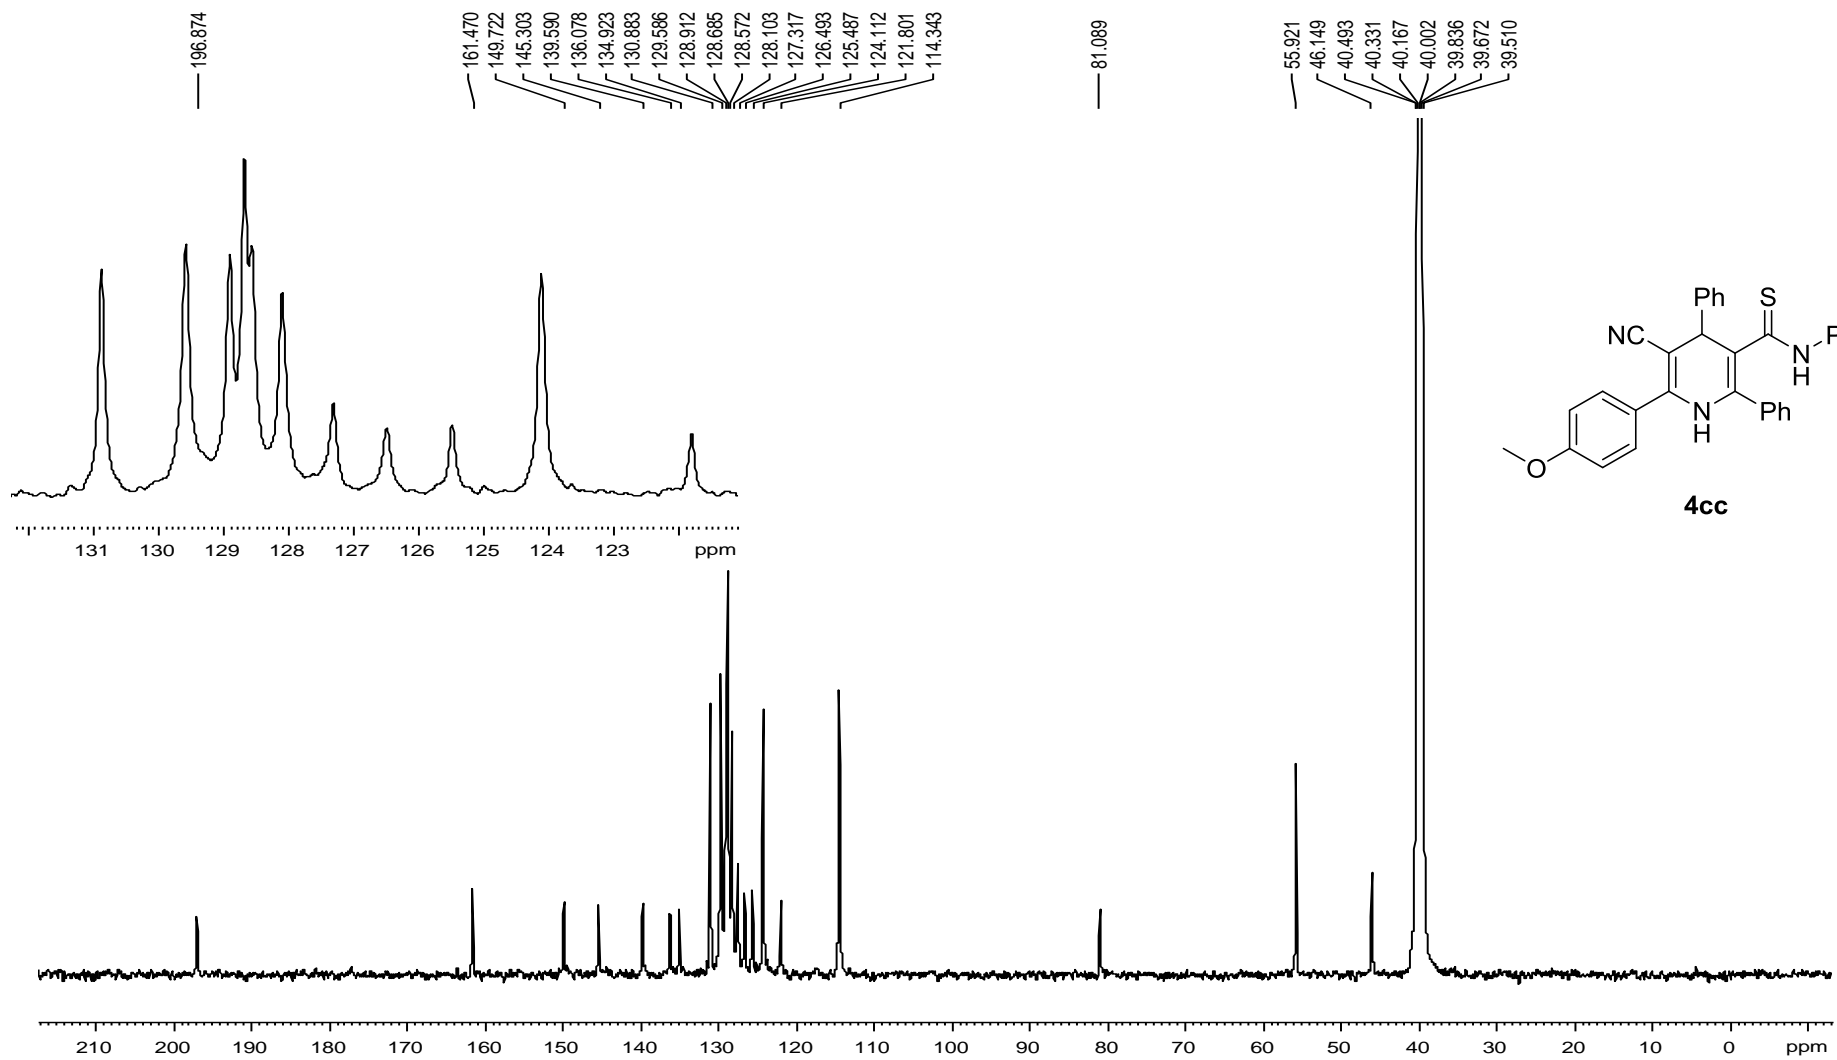

SKN-P-20a

1H 2015 07 02

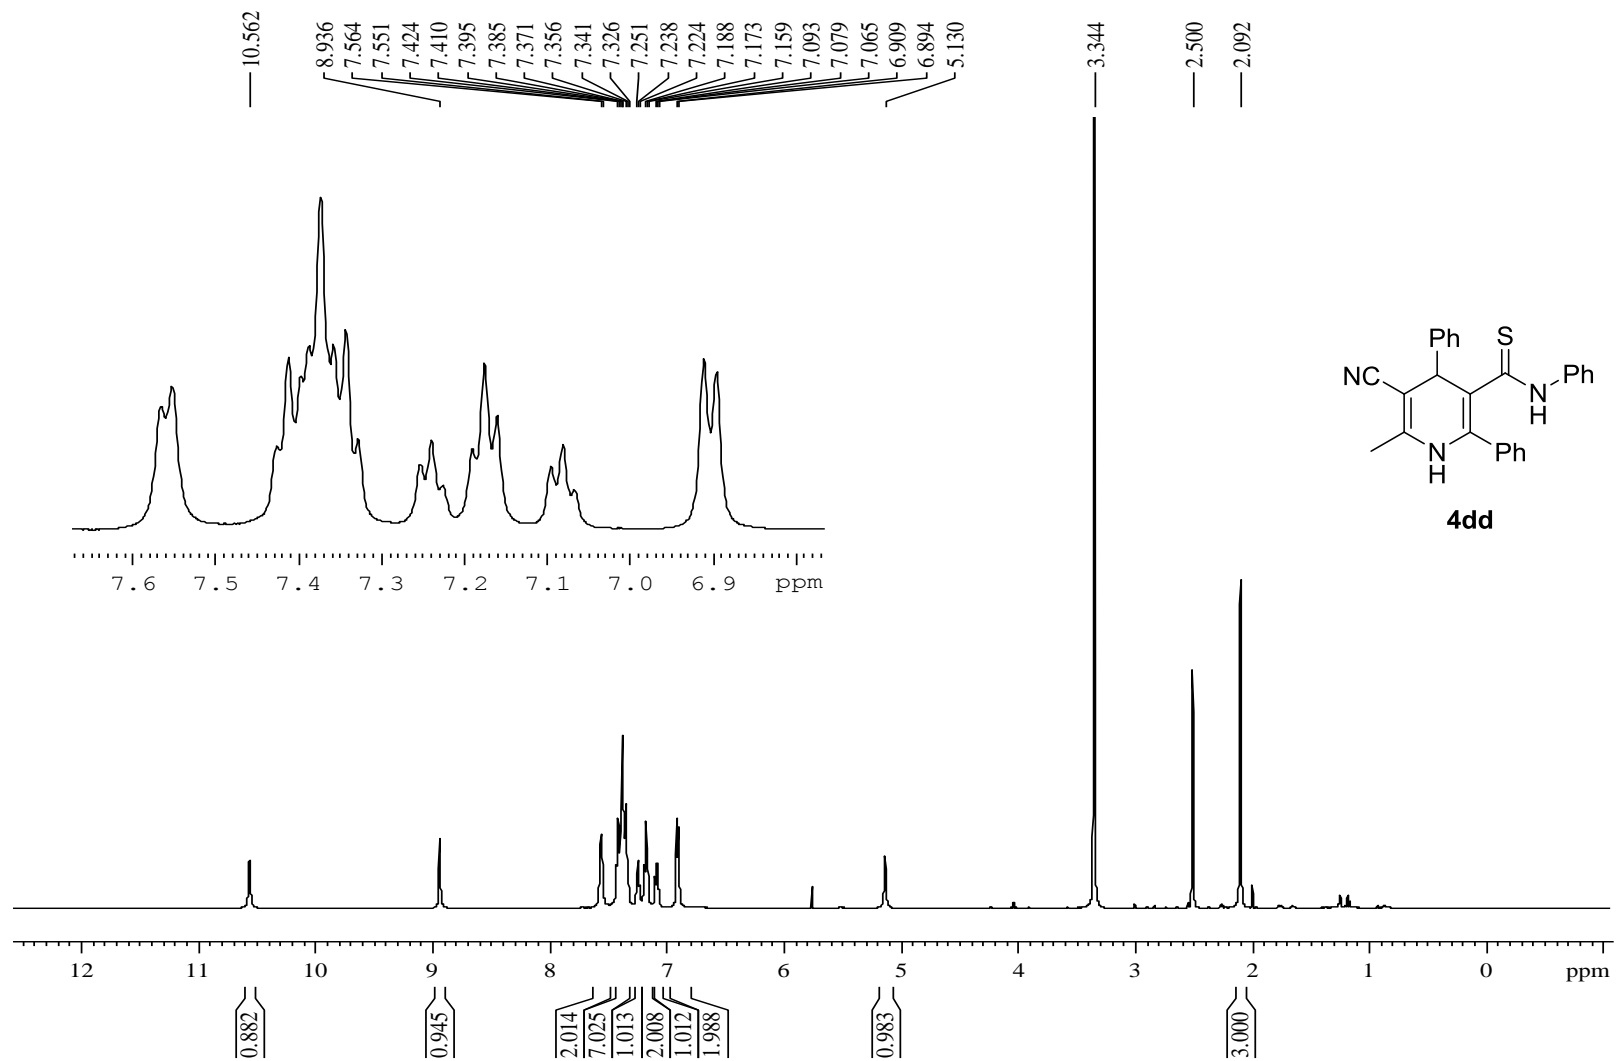

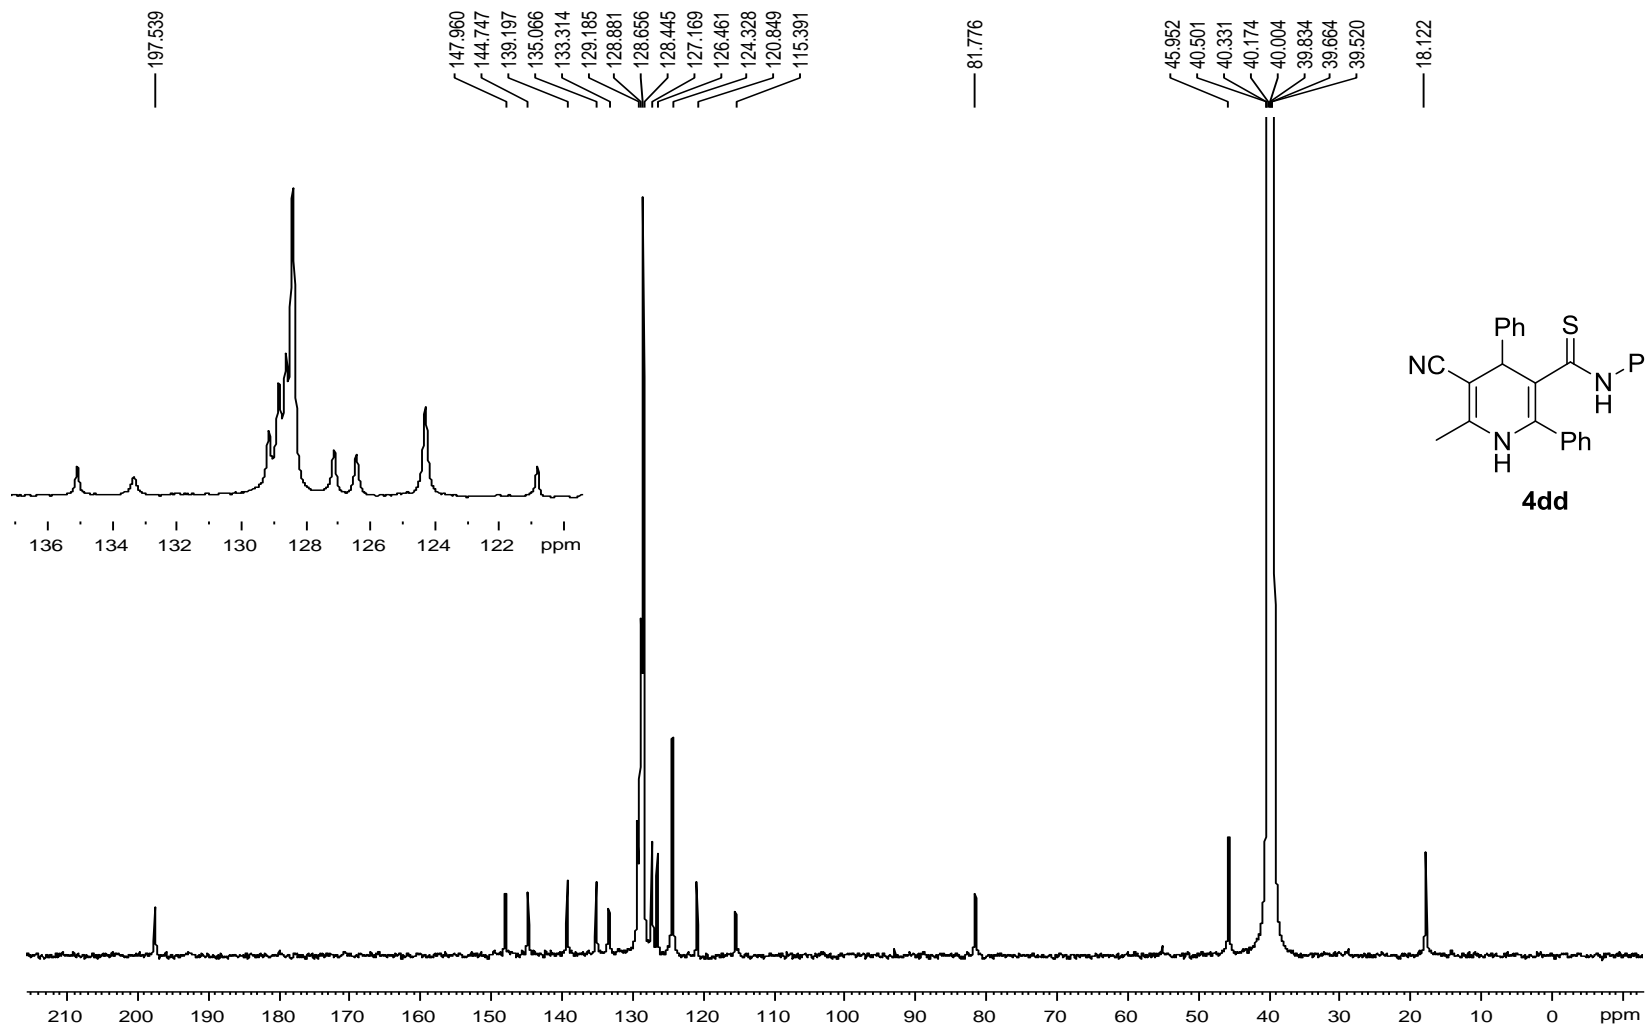

SKN-E-1 1H 1D 2014 09 04

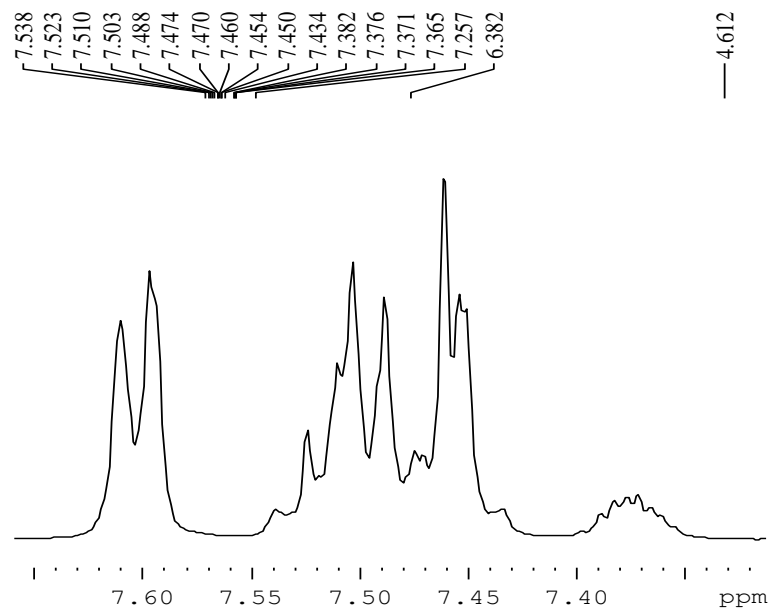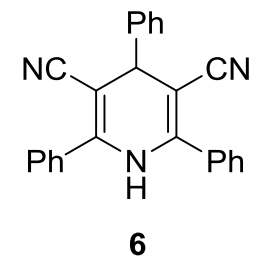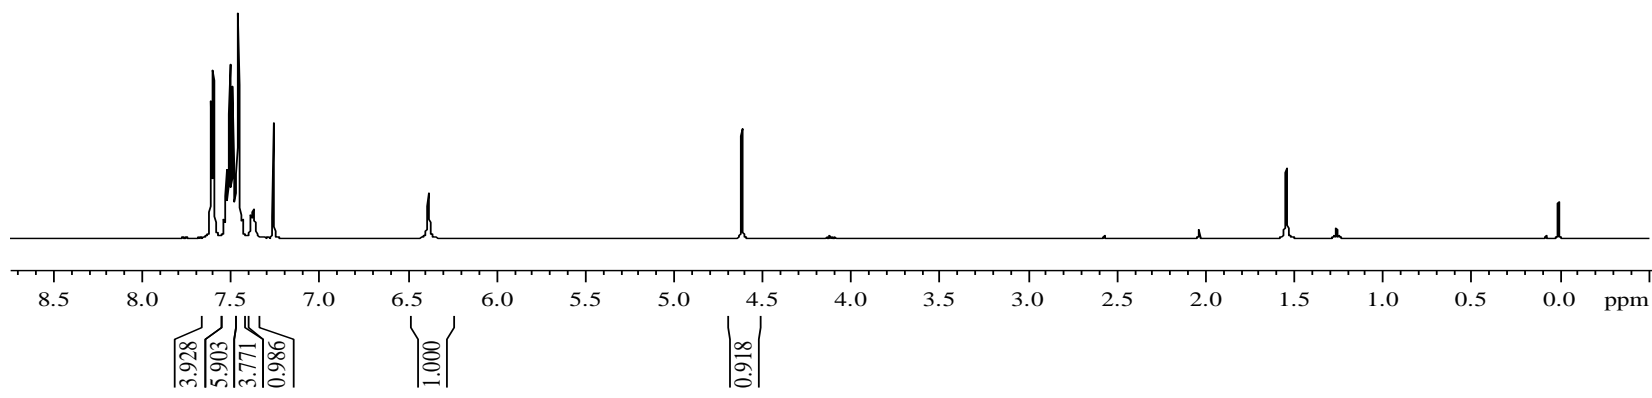

Supplement: c5ra26931h1.pdf [file c5ra26931h1.pdf]
